# Supplementary material for: Spin transitions in bis(amidinato)-N-heterocyclic carbene iron(ii) and iron(iii) complexes
Source: Royal Society of Chemistry journal article supplement (doi:10.1039/c5dt02440d), 2015-01-01
Supplement: c5dt02440d1.pdf [file c5dt02440d1.pdf]

# Spin Transitions in Bis(amidinato)-N-Heterocyclic Carbene Iron(II) and Iron(III) Complexes

Jessica L. Drake,<sup>a</sup> Hilan Z. Kaplan,<sup>a</sup> Matthew J. T. Wilding,<sup>b</sup> Bo Li,<sup>a</sup> and Jeffery A. Byers<sup>a,\*</sup>

<sup>a</sup> Eugene F. Merkert Chemistry Center, Department of Chemistry, Boston College, 2609 Beacon Street, Chestnut Hill, Massachusetts, 02467.

<sup>b</sup> Department of Chemistry and Chemical Biology, Harvard University, 12 Oxford Street, Cambridge, Massachusetts, 02138.

## TABLE OF CONTENTS

|                                                                                                                                                                        |      |
|------------------------------------------------------------------------------------------------------------------------------------------------------------------------|------|
| 1. General Considerations.....                                                                                                                                         | S-2  |
| 2. X-Band EPR Spectra for [(CDA <sup>iPr</sup> )FeCl <sub>2</sub> ]BF <sub>4</sub> •0.5CH <sub>2</sub> Cl <sub>2</sub> ( <b>3</b> ).....                               | S-3  |
| 3. <sup>57</sup> Fe Mössbauer Spectra for [(CDA <sup>iPr</sup> )FeCl <sub>2</sub> ]BF <sub>4</sub> •0.5CH <sub>2</sub> Cl <sub>2</sub> ( <b>3</b> ).....               | S-4  |
| 4. Sorai model for SQUID data for [(CDA <sup>iPr</sup> )FeCl <sub>2</sub> ]BF <sub>4</sub> •0.5CH <sub>2</sub> Cl <sub>2</sub> ( <b>3</b> ).....                       | S-5  |
| 5. Iron Catalyzed Aziridination Results.....                                                                                                                           | S-6  |
| 6. Computational Methods.....                                                                                                                                          | S-7  |
| 7. Comparison of Semi-empirical (DFT + SQUID) and Experimental Bond Distances.....                                                                                     | S-11 |
| 8. Experimental Procedures.....                                                                                                                                        | S-12 |
| 9. <sup>1</sup> H NMR Spectra.....                                                                                                                                     | S-14 |
| 10. Variable Temperature X-ray Crystallography Data for (CDA <sup>iPr</sup> )FeCl <sub>2</sub> ( <b>2a</b> ).....                                                      | S-17 |
| 11. Variable Temperature X-ray Crystallography Data for [(CDA <sup>iPr</sup> )FeCl <sub>2</sub> ]BF <sub>4</sub> •0.5CH <sub>2</sub> Cl <sub>2</sub> ( <b>3</b> )..... | S-38 |

## 1. General Considerations

Unless otherwise stated, all reactions were carried out in oven-dried glassware in a nitrogen atmosphere glovebox or using standard Schlenk line techniques.<sup>1</sup> Solvents were used after passage through a solvent purification system similar to the one reported by Grubbs<sup>2</sup> under a blanket of argon, and then degassed by briefly exposing the solvent to vacuum. Benzene-*d*<sub>6</sub> was purchased from Cambridge Isotope Laboratories and was vacuum distilled from Na/benzophenone. Dichloromethane-*d*<sub>2</sub> and chloroform-*d* were purchased from Cambridge Isotope Laboratories and vacuum distilled from CaH<sub>2</sub>.

Nuclear Magnetic Resonance (NMR) spectra were recorded at ambient temperature on spectrometers operating at 500 MHz for <sup>1</sup>H NMR. Resonances for paramagnetic complexes are reported as chemical shift in ppm (peak with at half height). Infrared (IR) spectra were recorded on an ATR infrared spectrometer. Magnetic moments were determined by Evans' method according to the procedure published by Gibson and coworkers.<sup>3</sup> High-resolution mass spectra were obtained at the Boston College Mass Spectrometry Facility using ESI+ or MALDI ionization modes.

Variable temperature (2–300 K) magnetization data were recorded in a 1 T magnetic field on an MPMS-XL Quantum Design SQUID magnetometer. Values for magnetic susceptibility were corrected for the underlying diamagnetic increment by using tabulated Pascal constants. The magnetic data at low temperature (<100 K) were fit using Eckhard Bill's julX program to obtain zero-field splitting parameters.<sup>4</sup> Statistic molar magnetic susceptibilities were calculated using the usual spin Hamiltonian approach for up to four spins with local multiplicities up to  $S = 5/2$  based on:

$$H = H_{ex} + H_{ZFS} + H_{Zee} \quad \text{where}$$
$$H_{ex} = -2 \sum_{i=1}^{ns-1} \sum_{j=i+1}^{ns} J_{ij} \vec{S}_i \cdot \vec{S}_j \quad \text{is the exchange Hamiltonian, and}$$
$$H_{ZFS} = \sum_{i=1}^{ns} D_i \left[ S_{z,i}^2 - \frac{1}{3} S_i(S_i + 1) \right] + \frac{E_i}{D_i} (S_{x,i}^2 - S_{y,i}^2) \quad \text{accounts for zero-field splitting, and}$$
$$H_{Zee} = \sum_{i=1}^{ns} g\beta \vec{S}_i \cdot \vec{B} \quad \text{is the Zeeman interaction.}$$

$J_{ij}$  are the exchange *coupling constants* of spins *i* and *j*, *ns* is the number of spins (max. four),  $D_i$ ,  $E/D_i$  and  $g_i$  are the local axial and rhombic zero field splitting parameters and *g*-values (isotropic average). At temperatures >100 K, the data was modeled using Sorai's model<sup>5</sup> as described in the text.

EPR samples were prepared in 4 mM OD suprasil quartz air-tight EPR tubes from Wilmad Labglass. All samples for EPR spectroscopy were run of pure solid powder or diluted in silica. X-band EPR spectra were recorded on a Bruker EMXplus spectrometer equipped with a 4119HS cavity and an Oxford ESR-900 helium flow cryostat operating at 10 K. The instrumental parameters employed for all samples were as follows: 1 mW power; time constant 41 ms; modulation amplitude 8 G; 9.40 GHz (10K spectra); modulation frequency 100 kHz. The approximate *g*-values are represented in Figures S1.

Selected single crystals suitable for X-ray crystallographic analysis were used for structural determination. Unless otherwise stated, the X-ray intensity data were measured at 100(2) K (Oxford Cryostream 700) on a Bruker Kappa APEX Duo diffractometer system equipped with a sealed Mo-target X-ray tube ( $\lambda = 0.71073 \text{ \AA}$ ) and a high brightness  $I\mu S$  copper source ( $\lambda = 1.54178 \text{ \AA}$ ). The crystals were mounted on a goniometer head with paratone oil. The detector was placed at a distance of 5.000 cm from the crystal. For each experiment, data collection strategy was determined by APEX software package and all frames were collected with a scan width of  $0.5^\circ$  in  $\omega$  and  $\phi$  with an exposure time of 10 or 20 s/frame. The frames were integrated with the Bruker SAINT Software package using a narrow-frame integration algorithm to a maximum  $2\theta$  angle of  $56.54^\circ$  ( $0.75 \text{ \AA}$  resolution) for Mo data and  $136.50^\circ$  ( $0.83 \text{ \AA}$  resolution) for Cu data. The final cell constants are based upon the refinement of the XYZ-centroids of several thousand reflections above  $20 \sigma(I)$ . Analysis of the data showed negligible decay during data collection. Data were corrected for absorption effects using the empirical method (SADABS). The structures were solved and refined by full-matrix least squares procedures on  $|F^2|$  using the Bruker SHELXTL (version 6.12) software package. All hydrogen atoms were included in idealized positions for structure factor calculations. Anisotropic displacement parameters were assigned to all non-hydrogen atoms, except those disordered. SQUEEZE (PLATON, A.Spek) was used in crystal structure of **3** to treat disordered solvent molecules (THF and/or CH<sub>2</sub>Cl<sub>2</sub>), which could not be satisfactorily modeled.

<sup>1</sup> B. J. Burger and J. E. Bercaw. *New Developments in the Synthesis, Manipulation and Characterization of Organometallic Compounds*; A. L. Wayda and M. Y. Darensbourg, eds.; American Chemical Society: Washington, D.C., 1987.

<sup>2</sup> A. B. Pangborn, M. A. Giardello, R. H. Grubbs, R. K. Rose and F. J. Timmers, *Organometallics* 1996, **15**, 1518.

<sup>3</sup> G. J. P. Britsovsek, V. C. Gibson, S. K. Spitzmesser, K. P. Tellmann, A. J. P. White, and D. J. Williams, *J. Chem. Soc., Dalton Trans.* 2002, 1159.

<sup>4</sup> E. Bill, julX version 1.5, MPI for Chemical Energy Conversion, Germany, 2013.

<sup>5</sup> O. Kahn, *Molecular Magnetism*, VCH Publishers, Inc.: New York, N. Y., 1993.

The chlorine atoms of some CH<sub>2</sub>Cl<sub>2</sub> molecules in the structure of **2a** and chlorine ligands in structure of **3** appeared to be disordered over two orientations, and the disorder was modeled as such.

<sup>57</sup>Fe Mössbauer spectra were measured on liquid nitrogen cooled samples at zero magnetic field with a constant acceleration spectrometer (SEE Co., Edina, MN). Solid or crystalline samples were prepared as Paratone-N mulls in an inert atmosphere glovebox and frozen in liquid nitrogen prior to handling in air. Isomer shifts are quoted relative to Fe foil at room temperature. Data was processed, simulated, and analyzed using a package written by E.R.K. for IGOR Pro 6 (Wavemetrics, Lake Oswego, OR).

## 2. Sorai model for SQUID data for [(CDA<sup>iPr</sup>)FeCl<sub>2</sub>]BF<sub>4</sub>•0.5CH<sub>2</sub>Cl<sub>2</sub> (**3**)

**Figure S1.** Variable temperature solid-state dc-magnetization data for **3** using SQUID magnetometry. Filled symbols represent experimental data, and the solid line represents the simulation obtained by combining two models: below 100 K, the data were fit to intermediate spin iron complexes with significant contributions from zero-field splitting (for  $S = 3/2$ :  $g_{iso} = 2.01$ ,  $|D| = 3.4 \text{ cm}^{-1}$ ,  $|E| = 2.0 \text{ cm}^{-1}$ ) and above 100 K, the data were fit using  $x = 1/[1 + \exp\{(\Delta H/R)(1/T - 1/T_c)\}]$  ( $T_c = 201 \text{ K}$ ;  $\Delta H = 503 \text{ cm}^{-1}$ ).<sup>17</sup>

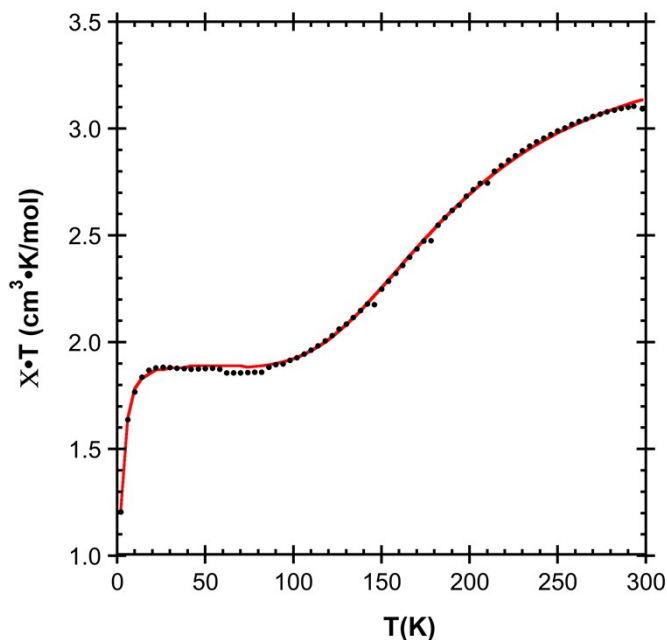

### 3. X-Band EPR Spectra for $[(\text{CDA}^{\text{Pr}})\text{FeCl}_2]\text{BF}_4 \cdot 0.5\text{CH}_2\text{Cl}_2$ (3)

Figure S2. X-Band EPR spectra at 3 K of  $[(\text{CDA}^{\text{Pr}})\text{FeCl}_2]\text{BF}_4$  (3).

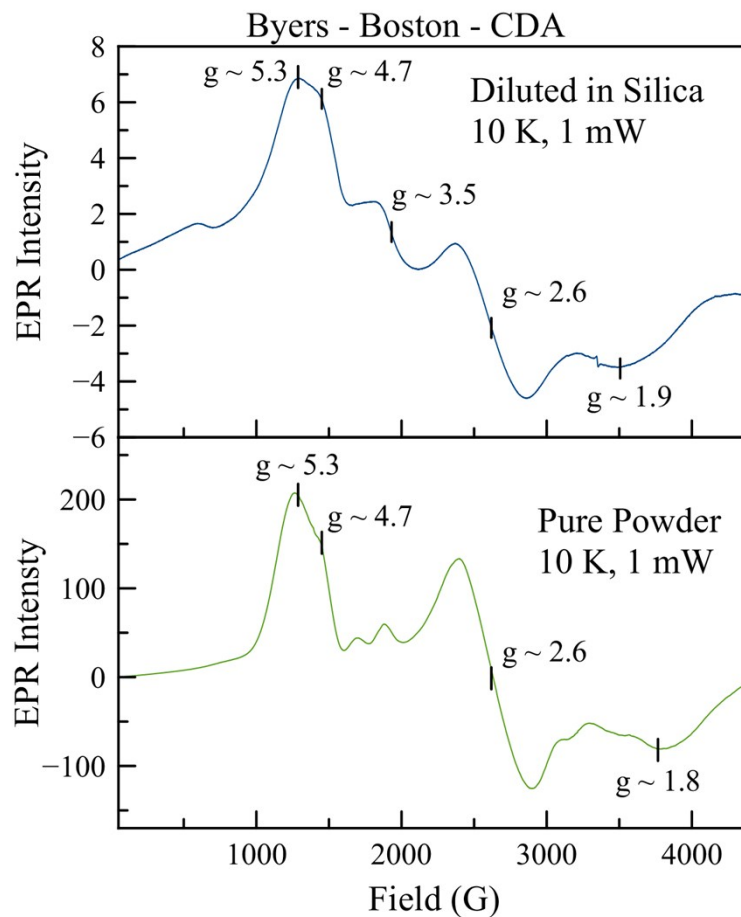

#### 4. $^{57}\text{Fe}$ Mössbauer Spectra for $[(\text{CDA}^{i\text{Pr}})\text{FeCl}_2]\text{BF}_4 \cdot 0.5\text{CH}_2\text{Cl}_2$ (**3**)

**Figure S3.** Zero-field  $^{57}\text{Fe}$  Mössbauer spectra of  $[(\text{CDA}^{i\text{Pr}})\text{FeCl}_2]\text{BF}_4$  (**3**). Simulation yields the following parameters:  $\delta$ ,  $|\Delta E_Q|$ (mm/s) at 100 K: 0.18, 2.21 ( $\Gamma$ ) = 0.25 mm/s; at 150 K: 0.18, 2.02 ( $\Gamma$ ) = 0.26 mm/s; at 200 K: 0.17, 1.75 ( $\Gamma$ ) = 0.22 mm/s; at 298 K: 0.21, 1.59 ( $\Gamma$ ) = 0.1 mm/s where  $\Gamma$  = half width at half height. The asymmetry of the recorded spectrum at low temperatures may be related to vibrational anisotropy with regard to the crystal lattice.<sup>6</sup>

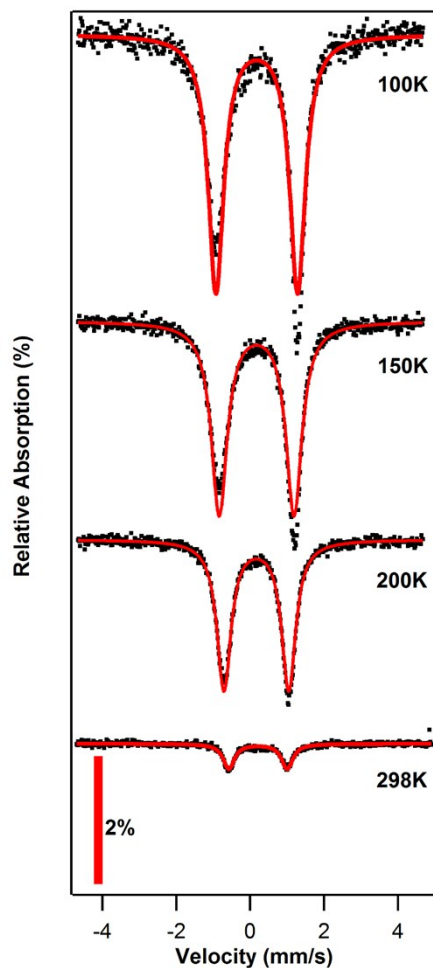

<sup>6</sup> V. I. Goldanskii, E. F. Makarov, I. P. Suzdalev and I. A. Vinogradov, *Phys. Rev. Lett.* 1968, **20**, 137.

## 5. Iron Catalyzed Aziridination Results

**Table S1.** Catalytic aziridination of 1-octene with *p*-tolylazide.

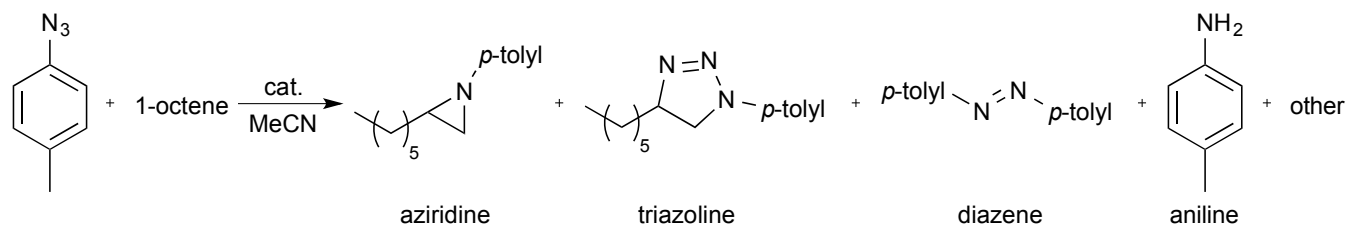

| entry | cat.                                                        | temp.<br>(°C) | conv.<br>(%) | aziridine<br>(%) | triazoline<br>(%) | diazene<br>(%) | aniline<br>(%) | others<br>(%) |
|-------|-------------------------------------------------------------|---------------|--------------|------------------|-------------------|----------------|----------------|---------------|
| 1     | N/A                                                         | 50            | 0            | -                | -                 | -              | -              | -             |
| 2     | FeCl <sub>2</sub>                                           | 50            | 0            | -                | -                 | -              | -              | -             |
| 3     | (PDI <sup><i>i</i>Pr</sup> )FeCl <sub>2</sub> ( <b>1a</b> ) | 50            | 0            | -                | -                 | -              | -              | -             |
| 4     | (CDA <sup><i>i</i>Pr</sup> )FeCl <sub>2</sub> ( <b>2a</b> ) | 50            | 0            | -                | -                 | -              | -              | -             |
| 5     | N/A                                                         | 90            | 44           | 23               | 13                | 0              | 0              | 8             |
| 6     | FeCl <sub>2</sub>                                           | 90            | 79           | 26               | 28                | 2              | 11             | 11            |
| 7     | (PDI <sup><i>i</i>Pr</sup> )FeCl <sub>2</sub> ( <b>1a</b> ) | 90            | 78           | 18               | 31                | 3              | 14             | 12            |
| 8     | (CDA <sup><i>i</i>Pr</sup> )FeCl <sub>2</sub> ( <b>2a</b> ) | 90            | 80           | 25               | 27                | 6              | 20             | 3             |
| 9     | (PDI <sup>Me</sup> )FeCl <sub>2</sub> ( <b>1b</b> )         | 50            | 11           | 0                | 0                 | 0              | 11             | 0             |
| 10    | (CDA <sup>Me</sup> )FeCl <sub>2</sub> ( <b>2b</b> )         | 50            | 75           | 28               | 0                 | 5              | 19             | 23            |
| 11    | hv                                                          | 50            | 73           | 10               | 2                 | 29             | 20             | 11            |

## 6. Computational Methods

All DFT calculations were carried out in an analogous fashion as described by Wieghardt, Chirik, and coworkers for the related bis(imino)pyridine complexes<sup>7</sup> using the ORCA open access software package.<sup>8</sup> Spin unrestricted Kohn-Sham geometry optimizations were carried out starting from coordinates obtained from the crystal structures of compounds **2a** and **3**. Calculations were carried out using the B3LYP functional. The triple-d quality basis sets def2-TZVP developed by Ahlrichs<sup>9</sup> with one set of polarization functions were used on the metal, on the nitrogen atoms, and on all atoms attached to the metal. For all remaining carbon and hydrogen atoms, a double- $\zeta$  quality def2-SV(P) basis set also developed by Ahlrichs<sup>10</sup> was used that also included a polarizing set of d-functions on the carbon atoms. Appropriate auxiliary basis sets were chosen to match the orbital basis sets.<sup>11</sup> The RIJCOSX<sup>12</sup> approximation was used to accelerate the calculations. Nonrelativistic single-point calculations were carried out on the optimized geometry to predict Mössbauer isomer shifts ( $\delta$ ) and quadrupole splittings ( $\Delta E_Q$ ). The ORCA “CoreProp” basis set CP(PPP) was used for iron.<sup>13</sup> This basis set is based on the TurboMole DZ basis set developed by Ahlrichs and coworkers and obtained from the basis set library under [ftp.chemi.uni-karlsruhe.de/pub/basen](ftp://chemi.uni-karlsruhe.de/pub/basen). The Ahlrichs (2d2fg,3p2df) polarization functions used were obtained from the TurboMole basis set library under [ftp.chemie.uni-karlsruhe.de/pub/basen](ftp://chemie.uni-karlsruhe.de/pub/basen). All other basis sets were the same as those used in the geometry optimization calculations. Output files for these calculations are available upon request.

**Table S2.** Coordinates from ORCA for (CDA<sup>iPr</sup>)FeCl<sub>2</sub> (**2a**).

| S = 2                      |           |           |           | S = 1                      |           |           |           |
|----------------------------|-----------|-----------|-----------|----------------------------|-----------|-----------|-----------|
| ZPE = -3648.072220660154 H |           |           |           | ZPE = -3648.063584850536 H |           |           |           |
| Fe                         | -0.141248 | 0.010487  | -0.172481 | Fe                         | -0.068459 | -0.041262 | 0.093672  |
| Cl                         | -1.270947 | 0.255670  | -2.119733 | Cl                         | -0.780495 | 0.110796  | -2.061290 |
| Cl                         | 2.221212  | -0.023715 | -0.082547 | Cl                         | 2.302117  | -0.058591 | 0.176698  |
| N                          | -0.418120 | 2.120793  | 0.661453  | N                          | -0.410082 | 1.920464  | 0.671305  |
| N                          | -0.437956 | -2.199216 | 0.313596  | N                          | -0.456477 | -2.051279 | 0.392584  |
| N                          | 0.093755  | 0.960613  | 2.586860  | N                          | 0.158267  | 0.967136  | 2.654169  |
| N                          | 0.062093  | -1.372474 | 2.403645  | N                          | 0.091218  | -1.394349 | 2.498322  |
| C                          | -0.095914 | -0.151550 | 1.843804  | C                          | 0.045138  | -0.167166 | 1.908838  |
| C                          | 0.576032  | 0.920625  | 3.980171  | C                          | 0.525831  | 0.937748  | 4.076520  |
| H                          | -0.280622 | 0.956356  | 4.679602  | H                          | -0.381083 | 1.020506  | 4.704899  |
| H                          | 1.206546  | 1.797829  | 4.177910  | H                          | 1.172599  | 1.796606  | 4.306572  |
| C                          | 1.387246  | -0.354824 | 4.177979  | C                          | 1.269063  | -0.366326 | 4.363635  |
| H                          | 2.297738  | -0.305688 | 3.555847  | H                          | 2.235577  | -0.355828 | 3.831076  |
| H                          | 1.695611  | -0.446177 | 5.232613  | H                          | 1.473258  | -0.445858 | 5.444239  |
| C                          | 0.566875  | -1.573342 | 3.775696  | C                          | 0.459182  | -1.578794 | 3.908790  |
| H                          | 1.196132  | -2.473510 | 3.806423  | H                          | 1.062069  | -2.492550 | 4.013179  |
| H                          | -0.276713 | -1.728767 | 4.474044  | H                          | -0.450065 | -1.701726 | 4.527210  |
| C                          | -0.195838 | -2.468594 | 1.541758  | C                          | -0.178203 | -2.427525 | 1.604662  |
| C                          | -0.181813 | -3.842157 | 2.157690  | C                          | -0.137391 | -3.836109 | 2.122733  |
| H                          | -0.611292 | -4.567456 | 1.452653  | H                          | -0.546906 | -4.527293 | 1.374088  |
| H                          | -0.760698 | -3.867741 | 3.096219  | H                          | -0.718590 | -3.933818 | 3.055814  |
| H                          | 0.847899  | -4.169069 | 2.389399  | H                          | 0.900723  | -4.147887 | 2.340439  |
| C                          | -0.714039 | -3.212694 | -0.660221 | C                          | -0.734924 | -3.025735 | -0.632252 |
| C                          | 0.354739  | -3.936822 | -1.244399 | C                          | 0.326097  | -3.744494 | -1.234937 |
| C                          | 0.041886  | -4.881120 | -2.235647 | C                          | 0.000443  | -4.692249 | -2.218482 |

<sup>7</sup> Bart, S.; Krzystof, C.; Eckhard, B.; Boukamp, M. W.; Lobkovsky, E.; Neese, F.; Wieghardt, K.; Chirik, P. J. *J. Am. Chem. Soc.* **2006**, *128*, 13901-13912.

<sup>8</sup> Neese, F., Orca: an ab initio, DFT and Semiempirical Electronic Structure Package, Version 2.8, Revision 2287; Institut für Physikalische und Theoretische Chemie, Universität Bonn: Bonn, Germany, 2010.

<sup>9</sup> a) Schäfer, A.; Horn, H.; Ahlrichs, R. *J. Chem. Phys.* **1992**, *97*, 2571. b) Weigend, F.; Ahlrichs, R. *Phys. Chem. Chem. Phys.* **2005**, *7*, 3297.

<sup>10</sup> Schäfer, A.; Horn, H.; Ahlrichs, R. *J. Chem. Phys.* **1992**, *97*, 2571.

<sup>11</sup> a) Eichkorn, K.; Weigend, F.; Treutler, O.; Ahlrichs, R. *Theor. Chem. Acc.* **1997**, *97*, 119. b) Eichkorn, K.; Treutler, O.; Öhm, H.; Häser, M.; Ahlrichs, R. *Chem. Phys. Lett.* **1995**, *240*, 283. c) Eichkorn, K.; Treutler, O.; Öhm, H.; Häser, M.; Ahlrichs, R. *Chem. Phys. Lett.* **1995**, *242*, 652.

<sup>12</sup> a) Neese, F.; Wennmohs, F.; Hansen, A.; Becker, U. *Chem. Phys.* **2009**, *356*, 98. b) Kossmann, S.; Neese, F. *Chem. Phys. Lett.* **2009**, *481*, 240. c) Neese, F. *J. Comput. Chem.* **2003**, *24*, 1740.

<sup>13</sup> Neese, F. *Inorg. Chim. Acta* **2002**, *337*, 181.

|   |           |           |           |   |           |           |           |
|---|-----------|-----------|-----------|---|-----------|-----------|-----------|
| H | 0.852503  | -5.445176 | -2.705601 | H | 0.804870  | -5.253691 | -2.701510 |
| C | -1.272871 | -5.108458 | -2.639205 | C | -1.319890 | -4.924962 | -2.600082 |
| H | -1.493412 | -5.849424 | -3.414616 | H | -1.551445 | -5.672440 | -3.366086 |
| C | -2.307575 | -4.372344 | -2.060285 | C | -2.345354 | -4.181923 | -2.015525 |
| H | -3.336108 | -4.545510 | -2.391203 | H | -3.377853 | -4.352202 | -2.335859 |
| C | -2.055348 | -3.403582 | -1.079131 | C | -2.077483 | -3.208865 | -1.042273 |
| C | 1.818809  | -3.709553 | -0.865648 | C | 1.795501  | -3.490216 | -0.904815 |
| H | 1.865273  | -2.954839 | -0.065137 | H | 1.856610  | -2.775310 | -0.071098 |
| C | 2.484339  | -4.997194 | -0.336580 | C | 2.537096  | -4.770332 | -0.472116 |
| H | 3.493311  | -4.776689 | 0.059374  | H | 3.548710  | -4.517514 | -0.103154 |
| H | 2.600017  | -5.754266 | -1.134469 | H | 2.660352  | -5.482482 | -1.309578 |
| H | 1.892941  | -5.461350 | 0.473871  | H | 2.001919  | -5.302069 | 0.336632  |
| C | 2.614183  | -3.111622 | -2.042937 | C | 2.500902  | -2.800490 | -2.090395 |
| H | 3.640157  | -2.860348 | -1.717963 | H | 3.523544  | -2.500185 | -1.800321 |
| H | 2.145272  | -2.179224 | -2.397130 | H | 1.957533  | -1.887429 | -2.385710 |
| H | 2.680857  | -3.819289 | -2.890777 | H | 2.565024  | -3.472642 | -2.967043 |
| C | -3.211961 | -2.605800 | -0.476871 | C | -3.224715 | -2.387665 | -0.458456 |
| H | -2.772497 | -1.773192 | 0.094926  | H | -2.777964 | -1.573676 | 0.134120  |
| C | -4.037188 | -3.461054 | 0.505403  | C | -4.102589 | -3.225406 | 0.491433  |
| H | -3.407818 | -3.900734 | 1.300804  | H | -3.506674 | -3.685950 | 1.301059  |
| H | -4.538192 | -4.295705 | -0.019215 | H | -4.611482 | -4.043608 | -0.051263 |
| H | -4.820833 | -2.848111 | 0.990025  | H | -4.882941 | -2.594699 | 0.958585  |
| C | -4.121757 | -1.974714 | -1.546342 | C | -4.072911 | -1.721298 | -1.556309 |
| H | -3.531928 | -1.357113 | -2.242919 | H | -3.433337 | -1.110287 | -2.215799 |
| H | -4.872403 | -1.320058 | -1.063994 | H | -4.832457 | -1.059176 | -1.099828 |
| H | -4.674416 | -2.737791 | -2.125666 | H | -4.611981 | -2.463533 | -2.174041 |
| C | -0.161347 | 2.185326  | 1.915007  | C | -0.091135 | 2.120379  | 1.914046  |
| C | -0.125916 | 3.441200  | 2.744897  | C | 0.007118  | 3.444569  | 2.615786  |
| H | -0.489278 | 4.290441  | 2.150160  | H | -0.307437 | 4.254222  | 1.943444  |
| H | 0.904789  | 3.669977  | 3.071568  | H | 1.048271  | 3.641106  | 2.932093  |
| H | -0.748729 | 3.347647  | 3.650940  | H | -0.623620 | 3.468546  | 3.521577  |
| C | -0.856991 | 3.256744  | -0.093296 | C | -0.864698 | 3.005532  | -0.161054 |
| C | -2.221484 | 3.637478  | -0.025559 | C | -2.233452 | 3.364999  | -0.094290 |
| C | -2.640554 | 4.731107  | -0.796991 | C | -2.682608 | 4.417627  | -0.904809 |
| H | -3.689302 | 5.042908  | -0.759538 | H | -3.735477 | 4.715051  | -0.865446 |
| C | -1.754155 | 5.422933  | -1.621482 | C | -1.816647 | 5.089521  | -1.766249 |
| H | -2.103326 | 6.276104  | -2.212130 | H | -2.186775 | 5.910618  | -2.388995 |
| C | -0.426267 | 5.005901  | -1.702078 | C | -0.481267 | 4.696584  | -1.839760 |
| H | 0.261406  | 5.533861  | -2.369554 | H | 0.191268  | 5.212746  | -2.531270 |
| C | 0.049483  | 3.914438  | -0.959488 | C | 0.024103  | 3.647709  | -1.055436 |
| C | -3.256356 | 2.863449  | 0.791735  | C | -3.238310 | 2.625676  | 0.788792  |
| H | -2.732353 | 2.073822  | 1.352977  | H | -2.700231 | 1.826655  | 1.322656  |
| C | -4.256217 | 2.148265  | -0.139166 | C | -4.313811 | 1.931832  | -0.067468 |
| H | -3.723660 | 1.498494  | -0.855302 | H | -3.844829 | 1.267146  | -0.812886 |
| H | -4.857795 | 2.874315  | -0.717150 | H | -4.938226 | 2.666059  | -0.609552 |
| H | -4.956234 | 1.525029  | 0.449468  | H | -4.986281 | 1.325955  | 0.569426  |
| C | -3.984580 | 3.748229  | 1.821669  | C | -3.873761 | 3.540251  | 1.853427  |
| H | -4.676224 | 3.137906  | 2.433133  | H | -4.549080 | 2.958820  | 2.509803  |
| H | -4.585036 | 4.536725  | 1.332026  | H | -4.472144 | 4.346936  | 1.391628  |
| H | -3.276105 | 4.249818  | 2.506968  | H | -3.109118 | 4.021364  | 2.491280  |
| C | 1.488683  | 3.444607  | -1.152016 | C | 1.484852  | 3.237228  | -1.215358 |
| H | 1.683373  | 2.616583  | -0.454214 | H | 1.683580  | 2.382436  | -0.552679 |
| C | 1.690216  | 2.874399  | -2.571449 | C | 1.777084  | 2.752654  | -2.649739 |
| H | 0.946292  | 2.090476  | -2.790562 | H | 1.073587  | 1.954961  | -2.938324 |
| H | 2.695221  | 2.422970  | -2.658488 | H | 2.801011  | 2.339091  | -2.704228 |
| H | 1.595287  | 3.665624  | -3.339810 | H | 1.700012  | 3.577732  | -3.383652 |
| C | 2.524710  | 4.542420  | -0.852683 | C | 2.454134  | 4.362059  | -0.807799 |
| H | 2.425604  | 4.937330  | 0.176285  | H | 2.285941  | 4.696848  | 0.233550  |



|   |          |          |           |   |          |          |           |
|---|----------|----------|-----------|---|----------|----------|-----------|
| H | 2.435098 | 5.400710 | -1.544292 | H | 2.358153 | 5.251026 | -1.459162 |
| H | 3.544413 | 4.128124 | -0.964333 | H | 3.496492 | 3.999378 | -0.884104 |

**Table S3.** Coordinates from ORCA for [(CDA<sup>Pr</sup>)FeCl<sub>2</sub>]BF<sub>4</sub> (**3**).

| <b>S = 5/2</b>             |           |           |           | <b>S = 3/2</b>            |           |           |           |
|----------------------------|-----------|-----------|-----------|---------------------------|-----------|-----------|-----------|
| ZPE = -3647.863481162823 H |           |           |           | ZPE = -3647.856704256630H |           |           |           |
| Fe                         | 0.084974  | 0.025918  | -0.246556 | Fe                        | 0.050143  | 0.061154  | -0.030500 |
| Cl                         | -1.204901 | -1.769138 | -0.327716 | Cl                        | -1.313583 | -1.794116 | 0.265453  |
| Cl                         | 0.925052  | 0.838214  | -2.095624 | Cl                        | 0.388919  | 0.391815  | -2.156461 |
| N                          | 0.758051  | -0.687640 | 2.548274  | N                         | 0.727259  | -0.769580 | 2.562462  |
| N                          | -0.983380 | 0.848774  | 2.411329  | N                         | -1.079326 | 0.718633  | 2.464342  |
| N                          | 1.927040  | -0.978538 | 0.577311  | N                         | 1.850341  | -0.820897 | 0.583175  |
| N                          | -1.441955 | 1.620110  | 0.277586  | N                         | -1.336088 | 1.593396  | 0.379918  |
| C                          | 0.003984  | 0.158791  | 1.852878  | C                         | -0.121122 | -0.000067 | 1.864739  |
| C                          | 0.494202  | -1.013684 | 3.970085  | C                         | 0.489514  | -1.113444 | 3.983122  |
| H                          | 1.162629  | -0.415088 | 4.613049  | H                         | 1.141772  | -0.495971 | 4.625036  |
| H                          | 0.716930  | -2.075645 | 4.140897  | H                         | 0.752302  | -2.169706 | 4.136766  |
| C                          | -0.971330 | -0.724040 | 4.275822  | C                         | -0.984297 | -0.880202 | 4.300484  |
| H                          | -1.153677 | -0.841235 | 5.356421  | H                         | -1.157119 | -1.024214 | 5.379154  |
| H                          | -1.612827 | -1.452483 | 3.750613  | H                         | -1.600984 | -1.616805 | 3.758497  |
| C                          | -1.346618 | 0.690039  | 3.840454  | C                         | -1.407516 | 0.529751  | 3.895466  |
| H                          | -2.425654 | 0.851474  | 3.959506  | H                         | -2.490270 | 0.658861  | 4.028114  |
| H                          | -0.818459 | 1.451746  | 4.439556  | H                         | -0.891959 | 1.298921  | 4.496298  |
| C                          | -1.697996 | 1.724382  | 1.525177  | C                         | -1.741774 | 1.609797  | 1.604313  |
| C                          | -2.660253 | 2.679356  | 2.163316  | C                         | -2.795207 | 2.495952  | 2.188264  |
| H                          | -3.014295 | 3.408922  | 1.422534  | H                         | -3.122632 | 3.236253  | 1.445898  |
| H                          | -2.177486 | 3.215534  | 2.999507  | H                         | -2.402199 | 3.024973  | 3.075273  |
| H                          | -3.542153 | 2.147726  | 2.563284  | H                         | -3.677104 | 1.909639  | 2.503263  |
| C                          | -2.141947 | 2.410028  | -0.711373 | C                         | -1.981392 | 2.382871  | -0.643223 |
| C                          | -3.407142 | 1.959624  | -1.166326 | C                         | -3.223305 | 1.948769  | -1.170207 |
| C                          | -4.038874 | 2.710705  | -2.169511 | C                         | -3.773063 | 2.700151  | -2.219928 |
| H                          | -5.013091 | 2.385231  | -2.543116 | H                         | -4.722806 | 2.384290  | -2.659086 |
| C                          | -3.451215 | 3.856010  | -2.701766 | C                         | -3.135464 | 3.835171  | -2.717479 |
| H                          | -3.964184 | 4.424018  | -3.483706 | H                         | -3.586820 | 4.402919  | -3.536706 |
| C                          | -2.210611 | 4.281976  | -2.228446 | C                         | -1.925565 | 4.252388  | -2.162464 |
| H                          | -1.763581 | 5.187763  | -2.644662 | H                         | -1.442838 | 5.153502  | -2.548833 |
| C                          | -1.521200 | 3.572323  | -1.235209 | C                         | -1.314736 | 3.534928  | -1.125886 |
| C                          | -4.119277 | 0.718748  | -0.622609 | C                         | -3.984748 | 0.721867  | -0.667374 |
| H                          | -3.469485 | 0.239243  | 0.126105  | H                         | -3.422086 | 0.269227  | 0.162951  |
| C                          | -5.446646 | 1.089356  | 0.078430  | C                         | -5.382831 | 1.105221  | -0.129602 |
| H                          | -5.296519 | 1.830005  | 0.884599  | H                         | -5.327737 | 1.890056  | 0.646969  |
| H                          | -5.918404 | 0.192470  | 0.520495  | H                         | -5.884821 | 0.223499  | 0.309231  |
| H                          | -6.170413 | 1.527006  | -0.632094 | H                         | -6.036990 | 1.491840  | -0.931653 |
| C                          | -4.358570 | -0.332064 | -1.723999 | C                         | -4.080280 | -0.367839 | -1.752637 |
| H                          | -3.416407 | -0.616755 | -2.222550 | H                         | -3.081215 | -0.648412 | -2.126918 |
| H                          | -5.055894 | 0.040134  | -2.495252 | H                         | -4.688286 | -0.032044 | -2.611626 |
| H                          | -4.800003 | -1.245382 | -1.286079 | H                         | -4.551747 | -1.275940 | -1.336854 |
| C                          | -0.185742 | 4.114111  | -0.722726 | C                         | -0.012168 | 4.052771  | -0.519917 |
| H                          | 0.314817  | 3.309393  | -0.156959 | H                         | 0.410026  | 3.256985  | 0.119635  |
| C                          | -0.408292 | 5.300645  | 0.240159  | C                         | -0.282672 | 5.274733  | 0.384382  |
| H                          | -1.043369 | 5.025304  | 1.100997  | H                         | -0.997086 | 5.036110  | 1.192776  |
| H                          | -0.905976 | 6.138087  | -0.281190 | H                         | -0.713068 | 6.108671  | -0.198905 |
| H                          | 0.554311  | 5.676332  | 0.633421  | H                         | 0.651976  | 5.638822  | 0.849971  |
| C                          | 0.769767  | 4.525123  | -1.857435 | C                         | 1.045777  | 4.382590  | -1.586346 |
| H                          | 0.939666  | 3.694638  | -2.561786 | H                         | 1.263121  | 3.505020  | -2.219725 |
| H                          | 1.746356  | 4.825283  | -1.436983 | H                         | 1.984056  | 4.703900  | -1.100962 |
| H                          | 0.384282  | 5.388916  | -2.427521 | H                         | 0.723134  | 5.207376  | -2.245435 |

|   |          |           |           |   |          |           |           |
|---|----------|-----------|-----------|---|----------|-----------|-----------|
| C | 1.861031 | -1.251690 | 1.822971  | C | 1.829791 | -1.210807 | 1.813525  |
| C | 2.823847 | -2.094734 | 2.602430  | C | 2.858759 | -2.042586 | 2.510366  |
| H | 2.364835 | -3.074666 | 2.832780  | H | 2.463455 | -3.058904 | 2.696159  |
| H | 3.108643 | -1.621643 | 3.556333  | H | 3.133555 | -1.601771 | 3.483422  |
| H | 3.728483 | -2.278258 | 2.006188  | H | 3.760072 | -2.135326 | 1.889614  |
| C | 3.098372 | -1.265313 | -0.215630 | C | 2.965620 | -1.113021 | -0.284726 |
| C | 4.037279 | -0.208585 | -0.344986 | C | 3.863453 | -0.046316 | -0.550152 |
| C | 5.179393 | -0.447200 | -1.118991 | C | 4.967069 | -0.316422 | -1.368469 |
| H | 5.924382 | 0.342579  | -1.244720 | H | 5.679740 | 0.477718  | -1.600176 |
| C | 5.377491 | -1.678399 | -1.749692 | C | 5.172274 | -1.591292 | -1.902775 |
| H | 6.277622 | -1.849752 | -2.347806 | H | 6.044994 | -1.787137 | -2.533205 |
| C | 4.421452 | -2.684006 | -1.632542 | C | 4.257017 | -2.610026 | -1.650534 |
| H | 4.582841 | -3.632908 | -2.151029 | H | 4.420720 | -3.593135 | -2.099531 |
| C | 3.252677 | -2.505840 | -0.872281 | C | 3.122963 | -2.400471 | -0.848094 |
| C | 3.808068 | 1.141956  | 0.339276  | C | 3.638023 | 1.338270  | 0.058731  |
| H | 2.714222 | 1.278468  | 0.415171  | H | 2.543697 | 1.499701  | 0.084854  |
| C | 4.331236 | 2.343597  | -0.464203 | C | 4.224572 | 2.490655  | -0.768333 |
| H | 3.949470 | 2.329088  | -1.498903 | H | 3.867781 | 2.461834  | -1.811912 |
| H | 5.434740 | 2.374325  | -0.499635 | H | 5.328963 | 2.477607  | -0.776537 |
| H | 3.994131 | 3.283846  | 0.009857  | H | 3.914567 | 3.455880  | -0.330116 |
| C | 4.377478 | 1.169843  | 1.772687  | C | 4.156198 | 1.418361  | 1.511103  |
| H | 4.160004 | 2.139744  | 2.258884  | H | 3.903525 | 2.397011  | 1.961159  |
| H | 5.474361 | 1.032926  | 1.765792  | H | 5.255369 | 1.304699  | 1.542547  |
| H | 3.954866 | 0.374572  | 2.410652  | H | 3.727593 | 0.634180  | 2.158625  |
| C | 2.201182 | -3.615152 | -0.830405 | C | 2.103966 | -3.526926 | -0.679137 |
| H | 1.415072 | -3.316741 | -0.117611 | H | 1.353344 | -3.212124 | 0.062723  |
| C | 1.516048 | -3.782115 | -2.204319 | C | 1.335175 | -3.768530 | -1.996614 |
| H | 1.099992 | -2.827146 | -2.568213 | H | 0.862850 | -2.841353 | -2.362113 |
| H | 0.685829 | -4.507445 | -2.132738 | H | 0.538143 | -4.516340 | -1.838331 |
| H | 2.228752 | -4.156786 | -2.960896 | H | 2.008163 | -4.149875 | -2.785877 |
| C | 2.775615 | -4.963938 | -0.351664 | C | 2.739184 | -4.838297 | -0.174009 |
| H | 3.257449 | -4.885167 | 0.640772  | H | 3.303390 | -4.697491 | 0.766562  |
| H | 3.530913 | -5.358701 | -1.054245 | H | 3.437312 | -5.267692 | -0.914573 |
| H | 1.969513 | -5.716305 | -0.283061 | H | 1.954791 | -5.593436 | 0.009429  |

## 7. Comparison of Semi-empirical (DFT + SQUID) and Experimental Bond Distances

**Figure S4.** Semi-empirical (DFT + SQUID) vs. experimental bond distances in a)  $(\text{CDA}^{\text{Pr}})\text{FeCl}_2$  (**2a**) and b) for  $[(\text{CDA}^{\text{Pr}})\text{FeCl}_2]\text{BF}_4$  (**3**).

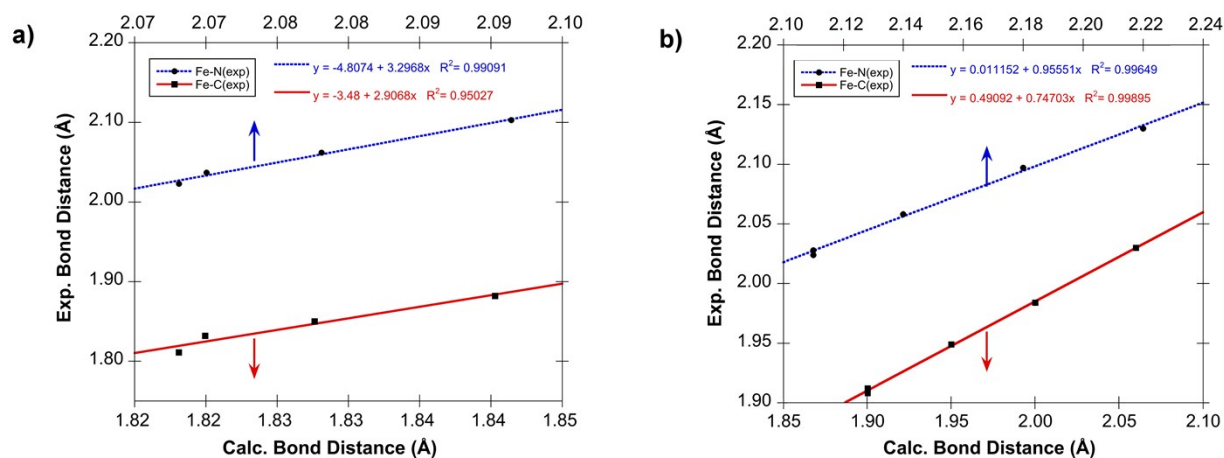

By using the magnetic data and the bond metrics from the DFT calculations as the limit for the high and intermediate spin electronic configurations, a theoretical bond distance at various temperatures can be predicted. While the absolute value for these semi-empirically determined bond distances do not match experimentally determined bond distances, they do reproduce how the bond distances respond to temperature. To illustrate this correlation, the semi-empirical metal-ligand bond distances are plotted versus the experimental metal-ligand bond distances at different temperatures in Figure S2. The nearly linear correlation observed for all bond lengths suggest that the same phenomenon that is responsible for the magnetic behavior is also responsible for the changes in bond distances. Since an equilibrium mixture of two spin states was used to model the magnetic behavior, we interpret the positive correlation between the magnetic and crystallographic data to be evidence for the existence of spin equilibrium between an intermediate and high spin state for both **2a** and **3**. Nevertheless, we cannot definitively rule out other possibilities such as significant inter-particle magnetic cooperativity or admixed quantum states to explain the solid state magnetic behavior that we observe.

## 8. Experimental Procedures

### Synthesis of {N,N-1,3-bis[1-(2,6-dimethylphenylimino)ethyl]4,5,6-trihydropyrimid-2-ylidene}iron dichloride (**2b**).

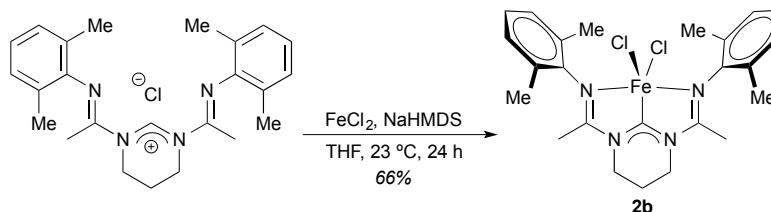

In an inert atmosphere glovebox, anhydrous iron(II) chloride (133 mg, 1.05 mmol, 1.05 equiv) was suspended in THF (15 mL) and cooled to  $-40\text{ }^\circ\text{C}$ . To the cold suspension was then added dropwise to a precooled ( $-40\text{ }^\circ\text{C}$ ) solution of sodium bis(trimethylsilyl)amide (195 mg, 1.05 mmol, 1.05 equiv) in THF (10 mL) and the mixture was held at  $-40\text{ }^\circ\text{C}$  and agitated occasionally for twelve hours. The mixture was then warmed to  $23\text{ }^\circ\text{C}$  for twenty minutes, during which time most of the remaining solid dissolved. The orange/brown solution was recooled to  $-40\text{ }^\circ\text{C}$ , filtered through Celite, and added to a precooled ( $-40\text{ }^\circ\text{C}$ ) suspension of 1,3-bis[1-(2,6-dimethylphenylimino)ethyl]-4,5,6-trihydropyrimidinium chloride<sup>14</sup> (414 mg, 1.00 mmol, 1.00 eq) in THF (10 mL). The suspension was allowed to gradually warm to  $23\text{ }^\circ\text{C}$ , during which time it turned bright pink in color. The reaction mixture was allowed to stir at  $23\text{ }^\circ\text{C}$  for twenty-four hours and was then concentrated *in vacuo*. The crude solid was dissolved in  $\text{CH}_2\text{Cl}_2$ , filtered through Celite, and was washed with THF. The crude residue was recrystallized from a mixture of  $\text{CH}_2\text{Cl}_2$  and pentane at  $-40\text{ }^\circ\text{C}$  to deliver the title compound **2b** as a bright pink red solid (331 mg, 66%). <sup>1</sup>H NMR ( $\text{CD}_2\text{Cl}_2$ , 500 MHz)  $\delta$  22.82 (262.7 Hz), 18.93 (225.9 Hz), 10.51 (319.4 Hz), 7.02 (94.3 Hz), 6.86 (73.3 Hz), 6.65 (40.2 Hz), 6.58 (60.3 Hz), 4.13 (78.1 Hz), 3.80 (214.5 Hz), 2.03 (65.7 Hz), 1.66 (112.4 Hz), 1.28 (50.0 Hz), 0.99 (130.1 Hz), 0.87 (42.9 Hz), 0.45 (427.2 Hz), 0.39 (162.2 Hz),  $-13.16$  (240.3 Hz),  $-31.05$  (526.2 Hz),  $-39.52$  (462.1 Hz). IR (neat) 1631, 1590, 1473, 1377, 1291, 1203, 1092, 1060, 1033, 1010, 817, 768  $\text{cm}^{-1}$ . HRMS (ESI+) for  $\text{C}_{24}\text{H}_{30}\text{ClFeN}_4$  [ $\text{M}$ ]<sup>+</sup>: Calcd. 465.15084; Found 465.15202.

### Synthesis of {N,N-1,3-bis[1-(2,6-diisopropylphenylimino)ethyl]4,5,6-trihydropyrimid-2-ylidene}iron dichloride tetrafluoroborate (**3**) $\cdot 0.5\text{CH}_2\text{Cl}_2$ .

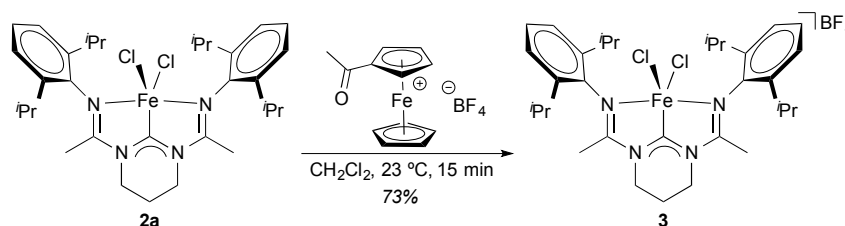

In an inert atmosphere glovebox, **2a** (50.0 mg, 0.0815 mmol, 1.00 equiv) was suspended in  $\text{CH}_2\text{Cl}_2$  (2.0 mL) and a solution of acetylferrocenium tetrafluoroborate (25.7 mg, 0.0815 mmol, 1.0 equiv) in  $\text{CH}_2\text{Cl}_2$  (2.0 mL) was added dropwise. Immediately upon addition, the reaction mixture changed from dark blue to a deep red. The solution was allowed to stir for 15 minutes at  $25\text{ }^\circ\text{C}$  and was then concentrated *in vacuo*. The crude solid was washed with pentane (5 x 10 mL) and was again dried *in vacuo*. The crude residue was recrystallized from 2:3:2  $\text{Et}_2\text{O}/\text{CH}_2\text{Cl}_2/\text{THF}$  v/v at  $-40\text{ }^\circ\text{C}$  to deliver the title compound **3** as dark red crystals suitable for X-ray crystallography (41.9 mg, 73%). <sup>1</sup>H NMR ( $\text{CD}_2\text{Cl}_2$ , 500 MHz)  $\delta$  77.58 (745.4 Hz), 60.25 (768.5 Hz), 39.06 (269.0 Hz), 7.52 (2853.2 Hz), 5.70 (358.3 Hz), 3.72 (95.9 Hz), 3.41 (11.7 Hz), 1.83 (13.9 Hz), 1.26 (14.8 Hz), 1.13 (9.4 Hz), 0.86 (14.5 Hz),  $-34.50$  (216.3 Hz). IR (neat) 1627, 1517, 1264, 1204, 1043, 1026, 1008, 816, 803  $\text{cm}^{-1}$ .  $\mu_{\text{eff}} = 5.0\ \mu_{\text{B}}$  at  $25\text{ }^\circ\text{C}$  (Evans' method). HRMS (MALDI) for  $\text{C}_{32.5}\text{H}_{46}\text{Cl}_3\text{F}_4\text{FeN}_4$  [ $\text{M}$ ]<sup>+</sup>: Calcd. 612.2449; Found 612.2450. Elemental analysis revealed that 0.5 equivalents of  $\text{CH}_2\text{Cl}_2$  crystallized with **3**:  $\text{C}_{32.5}\text{H}_{47}\text{BCl}_3\text{F}_4\text{FeN}_4$ ; calc'd: 52.55% C, 6.38% H, 7.54% N; found: 52.11% C, 6.78% H, 7.31% N. This resulted in a molecular weight of 742.85 g/mol, which was used as the molecular weight for the complex in magnetic moment measurements.

<sup>14</sup> J. A. Thagfi and G. G. Lavoie, *Organometallics* 2012, **31**, 7351.

**General procedure for the catalytic homocoupling of *p*-tolylazide.**

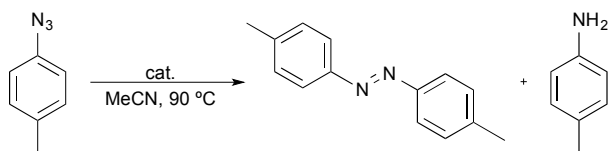

In an inert atmosphere glovebox, *p*-tolylazide (20 mg, 0.15 mmol, 1.00 equiv), cat. (0.008 mmol, 0.05 equiv), and MeCN (1 mL) were added to a Schlenk tube. The tube was removed from the glovebox and heated to 90 °C for 14 hours (or less), during which time the solution turned black. The solution was brought back into the glovebox and the mixture was extracted with pentane (3 x 1 mL). The combined pentane layers were concentrated *in vacuo* and analyzed by  $^1\text{H}$  NMR spectroscopy.

## 9. <sup>1</sup>H NMR Spectra

**Figure S5.** <sup>1</sup>H NMR for spectrum {N,N-1,3-bis[1-(2,6-dimethylphenylimino)ethyl]4,5,6-trihydropyrimid-2-ylidene} iron dichloride (**2b**) in CD<sub>2</sub>Cl<sub>2</sub>.

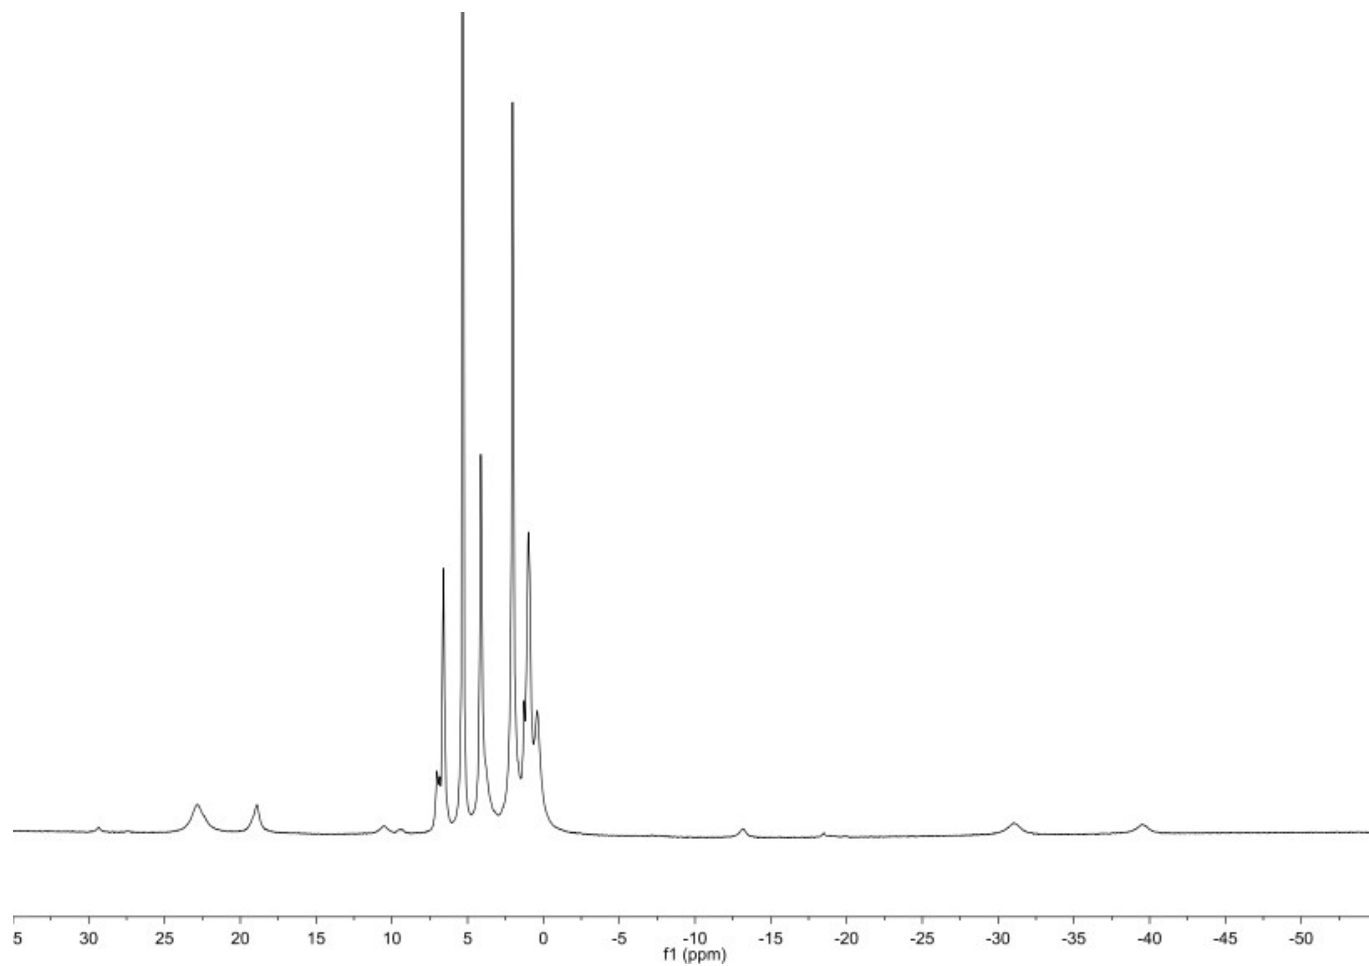

**Figure S6.**  $^1\text{H}$  NMR spectrum for {N,N-1,3-bis[1-(2,6-diisopropylphenylimino)ethyl]4,5,6-trihydropyrimid-2-ylidene}iron dichloride tetrafluoroborate (**3**) in  $\text{CD}_2\text{Cl}_2$ .

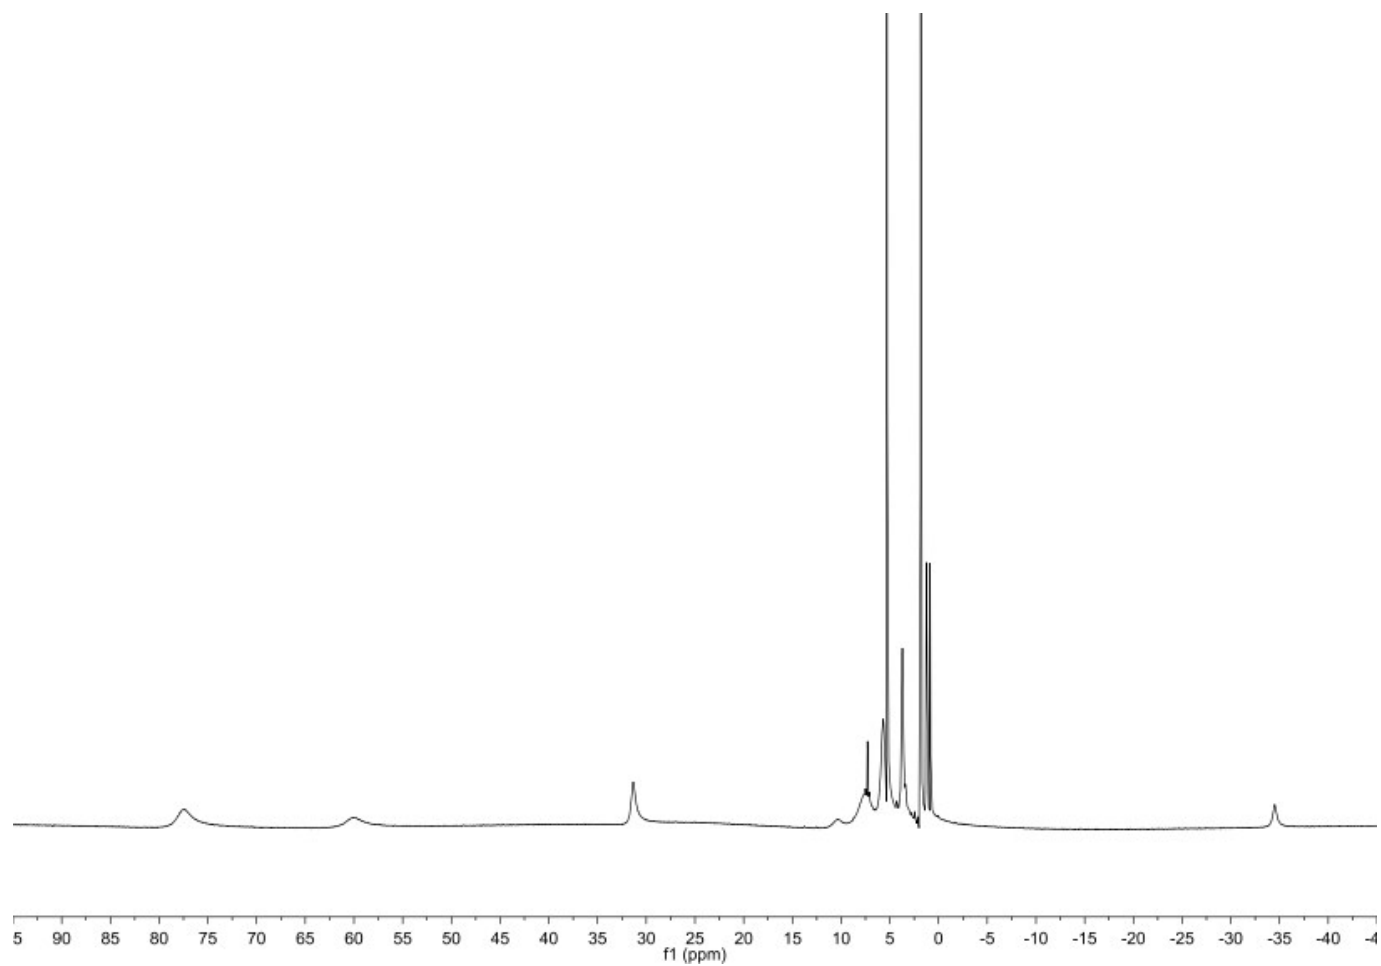

**Figure S7.** Representative  $^1\text{H}$  NMR spectrum for the catalytic homocoupling of *p*-tolylazide in  $\text{CDCl}_3$ .

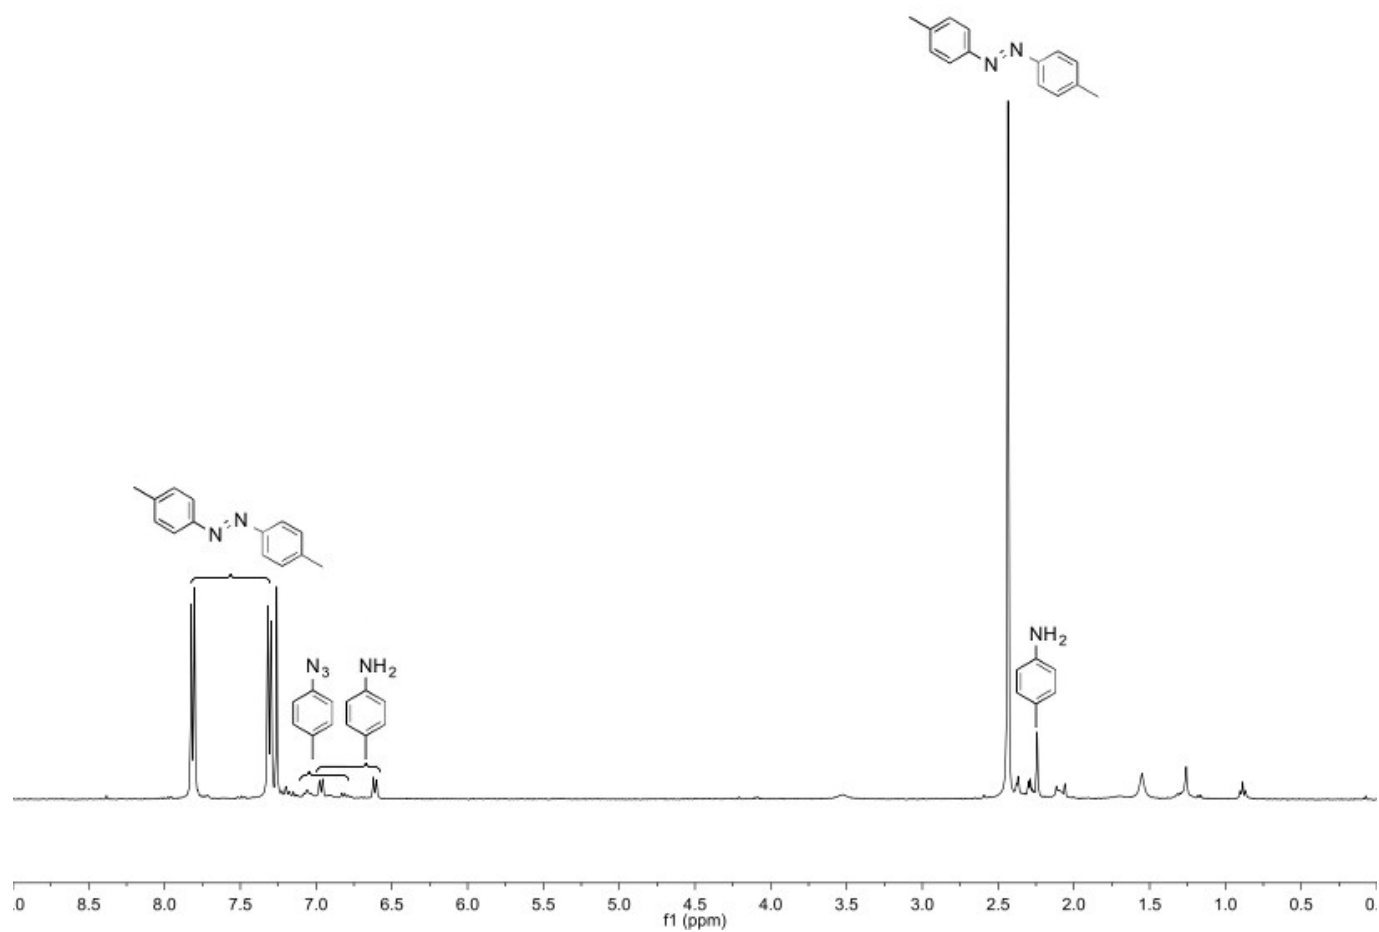



## 10. Variable Temperature X-ray Crystallography Data for (CDA<sup>iPr</sup>)FeCl<sub>2</sub> (2a)

**Table S4.** Variable temperature X-ray data for (CDA<sup>iPr</sup>)FeCl<sub>2</sub> (2a).

|                                   | 100 K                                                                                      | 150 K                                                                                     | 200 K                                                                                     | 250 K                                                                                      |
|-----------------------------------|--------------------------------------------------------------------------------------------|-------------------------------------------------------------------------------------------|-------------------------------------------------------------------------------------------|--------------------------------------------------------------------------------------------|
| Identification code/CCDC          | C32H46Cl2FeN4/900881                                                                       | C32H46Cl2FeN4_150K/927786                                                                 | C32H46Cl2FeN4_200K/927787                                                                 | C32H46Cl2FeN4_250K/927788                                                                  |
| Empirical formula                 | C <sub>34.25</sub> H <sub>50.50</sub> Cl <sub>6.50</sub> FeN <sub>4</sub>                  | C <sub>34</sub> H <sub>50</sub> Cl <sub>6</sub> FeN <sub>4</sub>                          | C <sub>34</sub> H <sub>50</sub> Cl <sub>6</sub> FeN <sub>4</sub>                          | C <sub>34</sub> H <sub>50</sub> Cl <sub>6</sub> FeN <sub>4</sub>                           |
| Formula weight                    | 804.56                                                                                     | 783.33                                                                                    | 783.33                                                                                    | 783.33                                                                                     |
| Temperature                       | 100(2) K                                                                                   | 150(2) K                                                                                  | 200(2) K                                                                                  | 250(2) K                                                                                   |
| Wavelength                        | 0.71073 Å                                                                                  | 1.54178 Å                                                                                 | 1.54178 Å                                                                                 | 0.54178 Å                                                                                  |
| Crystal system                    | Tetragonal                                                                                 | Tetragonal                                                                                | Tetragonal                                                                                | Tetragonal                                                                                 |
| Space group                       | I 4(1)/a                                                                                   | I 4(1)/a                                                                                  | I 4(1)/a                                                                                  | I 4(1)/a                                                                                   |
| Unit cell dimensions              | a = 21.4058(9) Å    α = 90°<br>b = 21.4058(9) Å    β = 90°<br>c = 35.1534(16) Å    γ = 90° | a = 21.3621(4) Å    α = 90°<br>b = 21.3621(4) Å    β = 90°<br>c = 35.3633(7) Å    γ = 90° | a = 21.4369(4) Å    α = 90°<br>b = 21.4369(4) Å    β = 90°<br>c = 35.4666(8) Å    γ = 90° | a = 21.5767(7) Å    α = 90°<br>b = 21.5767(7) Å    β = 90°<br>c = 35.5041(14) Å    γ = 90° |
| Volume                            | 16107.6(12) Å <sup>3</sup>                                                                 | 16137.7(5) Å <sup>3</sup>                                                                 | 16298.3(6) Å <sup>3</sup>                                                                 | 16529.1(10) Å <sup>3</sup>                                                                 |
| Z                                 | 16                                                                                         | 16                                                                                        | 16                                                                                        | 16                                                                                         |
| Density (calculated)              | 1.327 Mg/m <sup>3</sup>                                                                    | 1.290 Mg/m <sup>3</sup>                                                                   | 1.277 Mg/m <sup>3</sup>                                                                   | 1.259 Mg/m <sup>3</sup>                                                                    |
| Absorption coefficient            | 0.834 mm <sup>-1</sup>                                                                     | 6.863 mm <sup>-1</sup>                                                                    | 6.795 mm <sup>-1</sup>                                                                    | 6.701 mm <sup>-1</sup>                                                                     |
| F(000)                            | 6728                                                                                       | 6560                                                                                      | 6560                                                                                      | 6560                                                                                       |
| Crystal size                      | 0.15 x 0.14 x 0.14 mm <sup>3</sup>                                                         | 0.38 x 0.25 x 0.12 mm <sup>3</sup>                                                        | 0.38 x 0.25 x 0.12 mm <sup>3</sup>                                                        | 0.38 x 0.25 x 0.12 mm <sup>3</sup>                                                         |
| Theta range for data collection   | 1.35 to 32.15°                                                                             | 2.42 to 68.25°                                                                            | 2.41 to 68.40°                                                                            | 2.40 to 66.36°                                                                             |
| Index ranges                      | -28 ≤ h ≤ 32, -31 ≤ k ≤ 32, -52 ≤ l ≤ 52                                                   | -25 ≤ h ≤ 24, -25 ≤ k ≤ 18, -42 ≤ l ≤ 41                                                  | -25 ≤ h ≤ 24, -25 ≤ k ≤ 18, -42 ≤ l ≤ 41                                                  | -25 ≤ h ≤ 24, -25 ≤ k ≤ 18, -42 ≤ l ≤ 41                                                   |
| Reflections collected             | 147766                                                                                     | 78662                                                                                     | 79314                                                                                     | 79058                                                                                      |
| Independent reflections           | 14118 [R <sub>int</sub> = 0.04331]                                                         | 7133 [R <sub>int</sub> = 0.0460]                                                          | 7212 [R <sub>int</sub> = 0.0472]                                                          | 7169 [R <sub>int</sub> = 0.0597]                                                           |
| Completeness to θ = 32.15/66.36°  | 99.8 %                                                                                     | 96.6 %                                                                                    | 96.4 %                                                                                    | 98.7 %                                                                                     |
| Max. and min. transmission        | 0.8921 and 0.8850                                                                          | 0.4931 and 0.1801                                                                         | 0.4960 and 0.1822                                                                         | 0.5002 and 0.1851                                                                          |
| Data / restraints / parameters    | 14118 / 1 / 417                                                                            | 7133 / 2 / 425                                                                            | 7212 / 2 / 425                                                                            | 7169 / 2 / 425                                                                             |
| Goodness-of-fit on F <sup>2</sup> | 1.078                                                                                      | 1.029                                                                                     | 1.027                                                                                     | 1.020                                                                                      |
| Final R indices [I > 2σ(I)]       | R <sub>1</sub> = 0.0433, ωR <sub>2</sub> = 0.1152                                          | R <sub>1</sub> = 0.0415, ωR <sub>2</sub> = 0.1133                                         | R <sub>1</sub> = 0.0425, ωR <sub>2</sub> = 0.1148                                         | R <sub>1</sub> = 0.0520, ωR <sub>2</sub> = 0.1450                                          |
| R indices (all data)              | R <sub>1</sub> = 0.0559, ωR <sub>2</sub> = 0.1253                                          | R <sub>1</sub> = 0.0455, ωR <sub>2</sub> = 0.1170                                         | R <sub>1</sub> = 0.0484, ωR <sub>2</sub> = 0.1198                                         | R <sub>1</sub> = 0.0639, ωR <sub>2</sub> = 0.1557                                          |
| Largest diff. peak and hole       | 1.195 and -1.056 e.Å <sup>-3</sup>                                                         | 0.615 and -0.356 e.Å <sup>-3</sup>                                                        | 0.528 and -0.371 e.Å <sup>-3</sup>                                                        | 0.556 and -0.415 e.Å <sup>-3</sup>                                                         |

**Figure S8.** ORTEP plot of  $(\text{CDA}^{\text{Pr}})\text{FeCl}_2$  (**2a**) at 100 K at 50% probability level. Hydrogen atoms and solvent molecules were excluded for clarity.

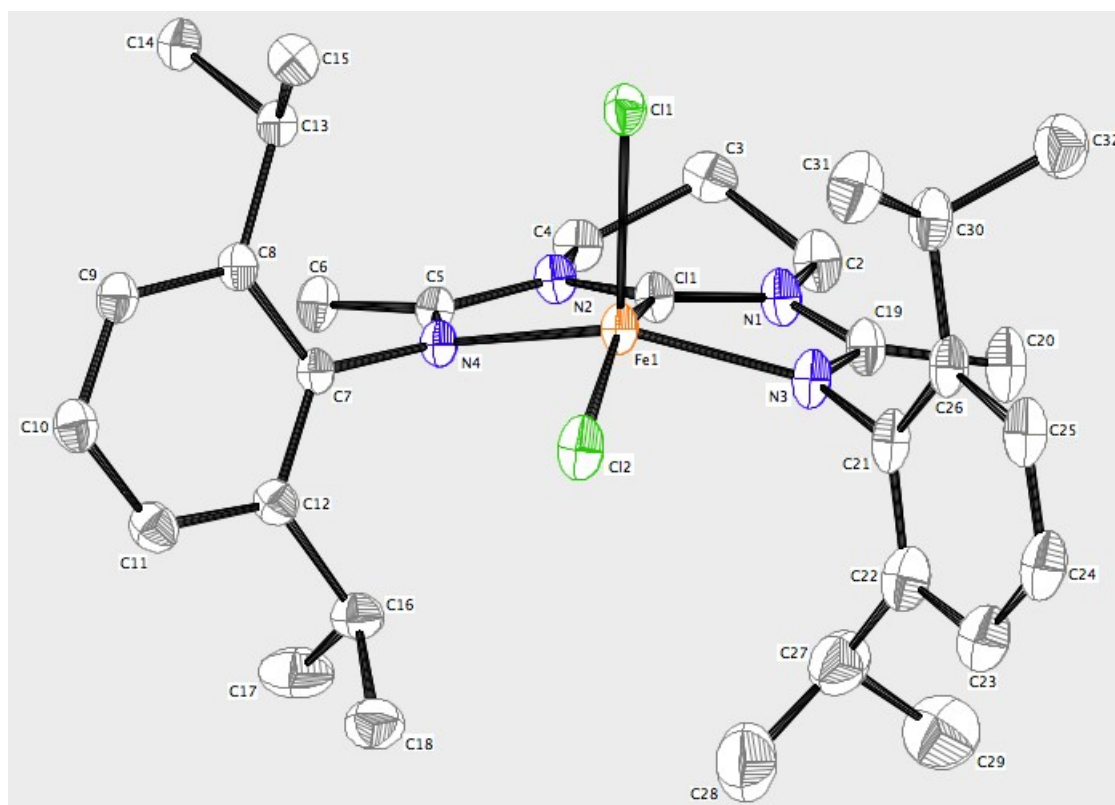

**Table S5.** Bond lengths (Å) and angles (°) for (CDA<sup>tPr</sup>)FeCl<sub>2</sub> (**2a**) at 100 K.

|              |            |              |          |                  |           |
|--------------|------------|--------------|----------|------------------|-----------|
| Fe(1)-C(1)   | 1.8116(18) | C(11)-C(12)  | 1.400(3) | C(26)-C(30)      | 1.511(4)  |
| Fe(1)-N(1)   | 2.0234(18) | C(11)-H(11A) | 0.9500   | C(27)-C(28)      | 1.516(6)  |
| Fe(1)-N(2)   | 2.0283(17) | C(12)-C(16)  | 1.517(3) | C(27)-C(29)      | 1.543(5)  |
| Fe(1)-Cl(1)  | 2.2803(6)  | C(13)-C(14)  | 1.526(3) | C(27)-H(27A)     | 1.0000    |
| Fe(1)-Cl(2)  | 2.3250(6)  | C(13)-C(15)  | 1.531(3) | C(28)-H(28A)     | 0.9800    |
| N(1)-C(19)   | 1.305(3)   | C(13)-H(13A) | 1.0000   | C(28)-H(28B)     | 0.9800    |
| N(1)-C(21)   | 1.436(3)   | C(14)-H(14A) | 0.9800   | C(28)-H(28C)     | 0.9800    |
| N(2)-C(5)    | 1.306(2)   | C(14)-H(14B) | 0.9800   | C(29)-H(29A)     | 0.9800    |
| N(2)-C(7)    | 1.442(2)   | C(14)-H(14C) | 0.9800   | C(29)-H(29B)     | 0.9800    |
| N(3)-C(1)    | 1.360(3)   | C(15)-H(15A) | 0.9800   | C(29)-H(29C)     | 0.9800    |
| N(3)-C(19)   | 1.372(3)   | C(15)-H(15B) | 0.9800   | C(30)-C(32)      | 1.528(4)  |
| N(3)-C(2)    | 1.470(3)   | C(15)-H(15C) | 0.9800   | C(30)-C(31)      | 1.535(4)  |
| N(4)-C(1)    | 1.360(3)   | C(16)-C(17)  | 1.529(4) | C(30)-H(30A)     | 1.0000    |
| N(4)-C(5)    | 1.374(3)   | C(16)-C(18)  | 1.529(4) | C(31)-H(31A)     | 0.9800    |
| N(4)-C(4)    | 1.477(3)   | C(16)-H(16A) | 1.0000   | C(31)-H(31B)     | 0.9800    |
| C(2)-C(3)    | 1.513(4)   | C(17)-H(17A) | 0.9800   | C(31)-H(31C)     | 0.9800    |
| C(2)-H(2A)   | 0.9900     | C(17)-H(17B) | 0.9800   | C(32)-H(32A)     | 0.9800    |
| C(2)-H(2B)   | 0.9900     | C(17)-H(17C) | 0.9800   | C(32)-H(32B)     | 0.9800    |
| C(3)-C(4)    | 1.518(3)   | C(18)-H(18A) | 0.9800   | C(32)-H(32C)     | 0.9800    |
| C(3)-H(3A)   | 0.9900     | C(18)-H(18B) | 0.9800   | C(1S)-Cl(4S)     | 1.758(4)  |
| C(3)-H(3B)   | 0.9900     | C(18)-H(18C) | 0.9800   | C(1S)-Cl(3S)     | 1.777(4)  |
| C(4)-H(4A)   | 0.9900     | C(19)-C(20)  | 1.488(3) | C(1S)-H(1SA)     | 0.9900    |
| C(4)-H(4B)   | 0.9900     | C(20)-H(20A) | 0.9800   | C(1S)-H(1SB)     | 0.9900    |
| C(5)-C(6)    | 1.486(3)   | C(20)-H(20B) | 0.9800   | C(2S)-Cl(5S)     | 1.733(3)  |
| C(6)-H(6A)   | 0.9800     | C(20)-H(20C) | 0.9800   | C(2S)-Cl(6S)     | 1.756(3)  |
| C(6)-H(6B)   | 0.9800     | C(21)-C(26)  | 1.399(3) | C(2S)-H(2SA)     | 0.9900    |
| C(6)-H(6C)   | 0.9800     | C(21)-C(22)  | 1.415(4) | C(2S)-H(2SB)     | 0.9900    |
| C(7)-C(8)    | 1.406(3)   | C(22)-C(23)  | 1.391(4) | C(3S)-Cl(8S)     | 1.711(17) |
| C(7)-C(12)   | 1.406(3)   | C(22)-C(27)  | 1.518(4) | C(3S)-Cl(7S)     | 1.733(17) |
| C(8)-C(9)    | 1.402(3)   | C(23)-C(24)  | 1.387(4) | C(3S)-H(3S1)     | 0.9900    |
| C(8)-C(13)   | 1.520(3)   | C(23)-H(23A) | 0.9500   | C(3S)-H(3S2)     | 0.9900    |
| C(9)-C(10)   | 1.379(3)   | C(24)-C(25)  | 1.369(4) | C(1)-Fe(1)-N(1)  | 78.42(8)  |
| C(9)-H(9A)   | 0.9500     | C(24)-H(24A) | 0.9500   | C(1)-Fe(1)-N(2)  | 78.25(8)  |
| C(10)-C(11)  | 1.380(3)   | C(25)-C(26)  | 1.405(3) | N(1)-Fe(1)-N(2)  | 146.60(7) |
| C(10)-H(10A) | 0.9500     | C(25)-H(25A) | 0.9500   | C(1)-Fe(1)-Cl(1) | 158.02(7) |

|                   |            |                    |            |                     |            |
|-------------------|------------|--------------------|------------|---------------------|------------|
| N(1)-Fe(1)-Cl(1)  | 94.66(6)   | C(3)-C(4)-H(4B)    | 110.1      | H(14A)-C(14)-H(14B) | 109.5      |
| N(2)-Fe(1)-Cl(1)  | 98.13(5)   | H(4A)-C(4)-H(4B)   | 108.4      | C(13)-C(14)-H(14C)  | 109.5      |
| C(1)-Fe(1)-Cl(2)  | 95.53(7)   | N(2)-C(5)-N(4)     | 114.61(17) | H(14A)-C(14)-H(14C) | 109.5      |
| N(1)-Fe(1)-Cl(2)  | 103.71(6)  | N(2)-C(5)-C(6)     | 126.88(18) | H(14B)-C(14)-H(14C) | 109.5      |
| N(2)-Fe(1)-Cl(2)  | 102.02(5)  | N(4)-C(5)-C(6)     | 118.48(17) | C(13)-C(15)-H(15A)  | 109.5      |
| Cl(1)-Fe(1)-Cl(2) | 106.40(2)  | C(5)-C(6)-H(6A)    | 109.5      | C(13)-C(15)-H(15B)  | 109.5      |
| C(19)-N(1)-C(21)  | 118.58(18) | C(5)-C(6)-H(6B)    | 109.5      | H(15A)-C(15)-H(15B) | 109.5      |
| C(19)-N(1)-Fe(1)  | 113.43(15) | H(6A)-C(6)-H(6B)   | 109.5      | C(13)-C(15)-H(15C)  | 109.5      |
| C(21)-N(1)-Fe(1)  | 127.98(14) | C(5)-C(6)-H(6C)    | 109.5      | H(15A)-C(15)-H(15C) | 109.5      |
| C(5)-N(2)-C(7)    | 117.66(16) | H(6A)-C(6)-H(6C)   | 109.5      | H(15B)-C(15)-H(15C) | 109.5      |
| C(5)-N(2)-Fe(1)   | 113.63(13) | H(6B)-C(6)-H(6C)   | 109.5      | C(12)-C(16)-C(17)   | 110.7(2)   |
| C(7)-N(2)-Fe(1)   | 128.22(12) | C(8)-C(7)-C(12)    | 121.52(18) | C(12)-C(16)-C(18)   | 112.1(2)   |
| C(1)-N(3)-C(19)   | 112.02(17) | C(8)-C(7)-N(2)     | 119.56(18) | C(17)-C(16)-C(18)   | 110.1(2)   |
| C(1)-N(3)-C(2)    | 122.95(18) | C(12)-C(7)-N(2)    | 118.90(18) | C(12)-C(16)-H(16A)  | 107.9      |
| C(19)-N(3)-C(2)   | 124.73(18) | C(9)-C(8)-C(7)     | 117.7(2)   | C(17)-C(16)-H(16A)  | 107.9      |
| C(1)-N(4)-C(5)    | 112.00(16) | C(9)-C(8)-C(13)    | 118.97(19) | C(18)-C(16)-H(16A)  | 107.9      |
| C(1)-N(4)-C(4)    | 122.85(17) | C(7)-C(8)-C(13)    | 123.33(18) | C(16)-C(17)-H(17A)  | 109.5      |
| C(5)-N(4)-C(4)    | 124.80(17) | C(10)-C(9)-C(8)    | 121.5(2)   | C(16)-C(17)-H(17B)  | 109.5      |
| N(3)-C(1)-N(4)    | 119.51(16) | C(10)-C(9)-H(9A)   | 119.3      | H(17A)-C(17)-H(17B) | 109.5      |
| N(3)-C(1)-Fe(1)   | 119.98(15) | C(8)-C(9)-H(9A)    | 119.3      | C(16)-C(17)-H(17C)  | 109.5      |
| N(4)-C(1)-Fe(1)   | 120.44(14) | C(9)-C(10)-C(11)   | 120.1(2)   | H(17A)-C(17)-H(17C) | 109.5      |
| N(3)-C(2)-C(3)    | 108.73(18) | C(9)-C(10)-H(10A)  | 120.0      | H(17B)-C(17)-H(17C) | 109.5      |
| N(3)-C(2)-H(2A)   | 109.9      | C(11)-C(10)-H(10A) | 120.0      | C(16)-C(18)-H(18A)  | 109.5      |
| C(3)-C(2)-H(2A)   | 109.9      | C(10)-C(11)-C(12)  | 121.1(2)   | C(16)-C(18)-H(18B)  | 109.5      |
| N(3)-C(2)-H(2B)   | 109.9      | C(10)-C(11)-H(11A) | 119.5      | H(18A)-C(18)-H(18B) | 109.5      |
| C(3)-C(2)-H(2B)   | 109.9      | C(12)-C(11)-H(11A) | 119.5      | C(16)-C(18)-H(18C)  | 109.5      |
| H(2A)-C(2)-H(2B)  | 108.3      | C(11)-C(12)-C(7)   | 118.2(2)   | H(18A)-C(18)-H(18C) | 109.5      |
| C(2)-C(3)-C(4)    | 111.02(19) | C(11)-C(12)-C(16)  | 119.6(2)   | H(18B)-C(18)-H(18C) | 109.5      |
| C(2)-C(3)-H(3A)   | 109.4      | C(7)-C(12)-C(16)   | 122.17(18) | N(1)-C(19)-N(3)     | 114.72(19) |
| C(4)-C(3)-H(3A)   | 109.4      | C(8)-C(13)-C(14)   | 112.35(18) | N(1)-C(19)-C(20)    | 126.8(2)   |
| C(2)-C(3)-H(3B)   | 109.4      | C(8)-C(13)-C(15)   | 111.15(18) | N(3)-C(19)-C(20)    | 118.44(19) |
| C(4)-C(3)-H(3B)   | 109.4      | C(14)-C(13)-C(15)  | 109.46(19) | C(19)-C(20)-H(20A)  | 109.5      |
| H(3A)-C(3)-H(3B)  | 108.0      | C(8)-C(13)-H(13A)  | 107.9      | C(19)-C(20)-H(20B)  | 109.5      |
| N(4)-C(4)-C(3)    | 107.86(17) | C(14)-C(13)-H(13A) | 107.9      | H(20A)-C(20)-H(20B) | 109.5      |
| N(4)-C(4)-H(4A)   | 110.1      | C(15)-C(13)-H(13A) | 107.9      | C(19)-C(20)-H(20C)  | 109.5      |
| C(3)-C(4)-H(4A)   | 110.1      | C(13)-C(14)-H(14A) | 109.5      | H(20A)-C(20)-H(20C) | 109.5      |
| N(4)-C(4)-H(4B)   | 110.1      | C(13)-C(14)-H(14B) | 109.5      | H(20B)-C(20)-H(20C) | 109.5      |

|                     |          |                     |            |
|---------------------|----------|---------------------|------------|
| C(26)-C(21)-C(22)   | 121.6(2) | C(26)-C(30)-C(31)   | 110.3(2)   |
| C(26)-C(21)-N(1)    | 120.2(2) | C(32)-C(30)-C(31)   | 111.1(2)   |
| C(22)-C(21)-N(1)    | 118.1(2) | C(26)-C(30)-H(30A)  | 107.8      |
| C(23)-C(22)-C(21)   | 117.9(3) | C(32)-C(30)-H(30A)  | 107.8      |
| C(23)-C(22)-C(27)   | 119.5(3) | C(31)-C(30)-H(30A)  | 107.8      |
| C(21)-C(22)-C(27)   | 122.6(2) | C(30)-C(31)-H(31A)  | 109.5      |
| C(24)-C(23)-C(22)   | 121.2(3) | C(30)-C(31)-H(31B)  | 109.5      |
| C(24)-C(23)-H(23A)  | 119.4    | H(31A)-C(31)-H(31B) | 109.5      |
| C(22)-C(23)-H(23A)  | 119.4    | C(30)-C(31)-H(31C)  | 109.5      |
| C(25)-C(24)-C(23)   | 119.8(3) | H(31A)-C(31)-H(31C) | 109.5      |
| C(25)-C(24)-H(24A)  | 120.1    | H(31B)-C(31)-H(31C) | 109.5      |
| C(23)-C(24)-H(24A)  | 120.1    | C(30)-C(32)-H(32A)  | 109.5      |
| C(24)-C(25)-C(26)   | 121.9(2) | C(30)-C(32)-H(32B)  | 109.5      |
| C(24)-C(25)-H(25A)  | 119.1    | H(32A)-C(32)-H(32B) | 109.5      |
| C(26)-C(25)-H(25A)  | 119.1    | C(30)-C(32)-H(32C)  | 109.5      |
| C(21)-C(26)-C(25)   | 117.5(3) | H(32A)-C(32)-H(32C) | 109.5      |
| C(21)-C(26)-C(30)   | 123.4(2) | H(32B)-C(32)-H(32C) | 109.5      |
| C(25)-C(26)-C(30)   | 119.1(2) | Cl(4S)-C(1S)-Cl(3S) | 111.22(16) |
| C(28)-C(27)-C(22)   | 112.1(3) | Cl(4S)-C(1S)-H(1SA) | 109.4      |
| C(28)-C(27)-C(29)   | 110.3(3) | Cl(3S)-C(1S)-H(1SA) | 109.4      |
| C(22)-C(27)-C(29)   | 111.2(3) | Cl(4S)-C(1S)-H(1SB) | 109.4      |
| C(28)-C(27)-H(27A)  | 107.7    | Cl(3S)-C(1S)-H(1SB) | 109.4      |
| C(22)-C(27)-H(27A)  | 107.7    | H(1SA)-C(1S)-H(1SB) | 108.0      |
| C(29)-C(27)-H(27A)  | 107.7    | Cl(5S)-C(2S)-Cl(6S) | 110.51(17) |
| C(27)-C(28)-H(28A)  | 109.5    | Cl(5S)-C(2S)-H(2SA) | 109.5      |
| C(27)-C(28)-H(28B)  | 109.5    | Cl(6S)-C(2S)-H(2SA) | 109.5      |
| H(28A)-C(28)-H(28B) | 109.5    | Cl(5S)-C(2S)-H(2SB) | 109.5      |
| C(27)-C(28)-H(28C)  | 109.5    | Cl(6S)-C(2S)-H(2SB) | 109.5      |
| H(28A)-C(28)-H(28C) | 109.5    | H(2SA)-C(2S)-H(2SB) | 108.1      |
| H(28B)-C(28)-H(28C) | 109.5    | Cl(8S)-C(3S)-Cl(7S) | 112.2(13)  |
| C(27)-C(29)-H(29A)  | 109.5    | Cl(8S)-C(3S)-H(3S1) | 109.2      |
| C(27)-C(29)-H(29B)  | 109.5    | Cl(7S)-C(3S)-H(3S1) | 109.2      |
| H(29A)-C(29)-H(29B) | 109.5    | Cl(8S)-C(3S)-H(3S2) | 109.2      |
| C(27)-C(29)-H(29C)  | 109.5    | Cl(7S)-C(3S)-H(3S2) | 109.2      |
| H(29A)-C(29)-H(29C) | 109.5    | H(3S1)-C(3S)-H(3S2) | 107.9      |
| H(29B)-C(29)-H(29C) | 109.5    |                     |            |
| C(26)-C(30)-C(32)   | 111.8(2) |                     |            |

**Table S6.** Anisotropic displacement parameters ( $\text{\AA}^2 \times 10^3$ ) for  $(\text{CDA}^{\text{Pr}})\text{FeCl}_2$  (**2a**) at 100 K. The anisotropic displacement factor exponent takes the form:  $-2p^2[h^2a^*2U^{11}+\dots+2hka^*b^*U^{12}]$ .

|        | $U^{11}$ | $U^{22}$ | $U^{33}$ | $U^{23}$ | $U^{13}$ | $U^{12}$ |
|--------|----------|----------|----------|----------|----------|----------|
| Fe(1)  | 29(1)    | 15(1)    | 11(1)    | 0(1)     | 1(1)     | -2(1)    |
| Cl(1)  | 47(1)    | 24(1)    | 13(1)    | 0(1)     | -5(1)    | 2(1)     |
| Cl(2)  | 28(1)    | 19(1)    | 26(1)    | 1(1)     | 4(1)     | -4(1)    |
| N(1)   | 38(1)    | 16(1)    | 16(1)    | 0(1)     | 2(1)     | -1(1)    |
| N(2)   | 23(1)    | 16(1)    | 12(1)    | -1(1)    | 0(1)     | -1(1)    |
| N(3)   | 36(1)    | 19(1)    | 12(1)    | -2(1)    | 0(1)     | -6(1)    |
| N(4)   | 26(1)    | 20(1)    | 10(1)    | 2(1)     | -1(1)    | -4(1)    |
| C(1)   | 28(1)    | 17(1)    | 11(1)    | 0(1)     | -1(1)    | -5(1)    |
| C(2)   | 42(1)    | 27(1)    | 11(1)    | -4(1)    | 1(1)     | -7(1)    |
| C(3)   | 28(1)    | 36(1)    | 13(1)    | -2(1)    | -1(1)    | -4(1)    |
| C(4)   | 30(1)    | 27(1)    | 10(1)    | 2(1)     | 0(1)     | 0(1)     |
| C(5)   | 22(1)    | 16(1)    | 14(1)    | 1(1)     | 0(1)     | 1(1)     |
| C(6)   | 34(1)    | 18(1)    | 18(1)    | 4(1)     | 4(1)     | -1(1)    |
| C(7)   | 22(1)    | 16(1)    | 13(1)    | -1(1)    | 0(1)     | -2(1)    |
| C(8)   | 25(1)    | 18(1)    | 14(1)    | -1(1)    | 1(1)     | -2(1)    |
| C(9)   | 28(1)    | 21(1)    | 21(1)    | -6(1)    | 3(1)     | 0(1)     |
| C(10)  | 31(1)    | 24(1)    | 23(1)    | -7(1)    | 1(1)     | -5(1)    |
| C(11)  | 27(1)    | 29(1)    | 22(1)    | -6(1)    | -1(1)    | -7(1)    |
| C(12)  | 22(1)    | 23(1)    | 18(1)    | -3(1)    | 0(1)     | -2(1)    |
| C(13)  | 24(1)    | 18(1)    | 17(1)    | 0(1)     | 2(1)     | -2(1)    |
| C(14)  | 30(1)    | 19(1)    | 24(1)    | 1(1)     | 0(1)     | 1(1)     |
| C(15)  | 28(1)    | 29(1)    | 22(1)    | 2(1)     | 2(1)     | -5(1)    |
| C(16)  | 24(1)    | 33(1)    | 22(1)    | -5(1)    | -1(1)    | 1(1)     |
| C(17)  | 28(1)    | 64(2)    | 32(1)    | 1(1)     | 8(1)     | 4(1)     |
| C(18)  | 29(1)    | 41(1)    | 35(1)    | -5(1)    | -9(1)    | 5(1)     |
| C(19)  | 36(1)    | 18(1)    | 18(1)    | -3(1)    | 2(1)     | -6(1)    |
| C(20)  | 62(2)    | 20(1)    | 25(1)    | -8(1)    | -2(1)    | -7(1)    |
| C(21)  | 46(1)    | 16(1)    | 17(1)    | -1(1)    | 1(1)     | 0(1)     |
| C(22)  | 47(2)    | 25(1)    | 31(1)    | 1(1)     | 6(1)     | 4(1)     |
| C(23)  | 50(2)    | 30(1)    | 43(2)    | 0(1)     | -1(1)    | 9(1)     |
| C(24)  | 56(2)    | 22(1)    | 27(1)    | 1(1)     | -3(1)    | 7(1)     |
| C(25)  | 53(2)    | 20(1)    | 18(1)    | 1(1)     | -1(1)    | -3(1)    |
| C(26)  | 43(1)    | 17(1)    | 17(1)    | 0(1)     | -1(1)    | -1(1)    |
| C(27)  | 46(2)    | 36(1)    | 57(2)    | 13(1)    | 17(2)    | 8(1)     |
| C(28)  | 67(2)    | 40(2)    | 81(3)    | -12(2)   | 22(2)    | -10(2)   |
| C(29)  | 59(2)    | 66(2)    | 51(2)    | -1(2)    | 17(2)    | -1(2)    |
| C(30)  | 44(1)    | 20(1)    | 26(1)    | 4(1)     | 4(1)     | -2(1)    |
| C(31)  | 58(2)    | 33(1)    | 36(1)    | 1(1)     | 17(1)    | 6(1)     |
| C(32)  | 45(2)    | 29(1)    | 46(2)    | 6(1)     | -3(1)    | -4(1)    |
| C(1S)  | 55(2)    | 27(1)    | 56(2)    | 4(1)     | -20(2)   | -9(1)    |
| C(2S)  | 46(2)    | 42(2)    | 29(1)    | -5(1)    | 1(1)     | -4(1)    |
| Cl(4S) | 39(1)    | 54(1)    | 43(1)    | 1(1)     | 5(1)     | 0(1)     |
| Cl(3S) | 47(1)    | 100(1)   | 45(1)    | -1(1)    | 8(1)     | -30(1)   |
| Cl(6S) | 80(1)    | 60(1)    | 37(1)    | -9(1)    | 10(1)    | 14(1)    |
| Cl(5S) | 48(1)    | 161(1)   | 45(1)    | -12(1)   | 2(1)     | -24(1)   |

**Figure S9.** ORTEP plot of  $(\text{CDA}^{\text{Pr}})\text{FeCl}_2$  (**2a**) at 150 K at 50% probability level. Hydrogen atoms and solvent molecules were excluded for clarity.

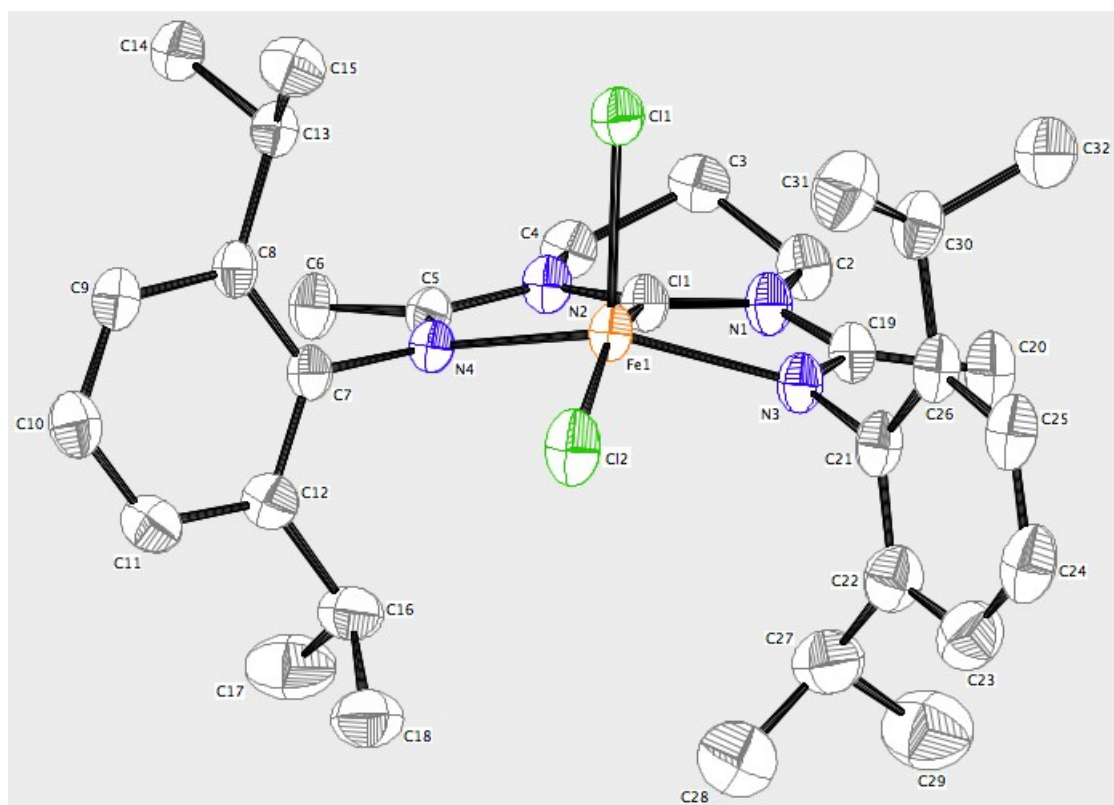

**Table S7.** Bond lengths (Å) and angles (°) for (CDA<sup>tPr</sup>)FeCl<sub>2</sub> (**2a**) at 150 K.

|              |           |              |          |                   |           |
|--------------|-----------|--------------|----------|-------------------|-----------|
| Fe(1)-C(1)   | 1.832(2)  | C(11)-H(11A) | 0.9500   | C(27)-C(29)       | 1.535(6)  |
| Fe(1)-N(3)   | 2.037(2)  | C(12)-C(16)  | 1.523(4) | C(27)-H(27A)      | 1.0000    |
| Fe(1)-N(4)   | 2.041(2)  | C(13)-C(15)  | 1.527(4) | C(28)-H(28A)      | 0.9800    |
| Fe(1)-Cl(2)  | 2.2697(7) | C(13)-C(14)  | 1.531(4) | C(28)-H(28B)      | 0.9800    |
| Fe(1)-Cl(1)  | 2.3210(8) | C(13)-H(13A) | 1.0000   | C(28)-H(28C)      | 0.9800    |
| N(1)-C(1)    | 1.358(3)  | C(14)-H(14A) | 0.9800   | C(29)-H(29A)      | 0.9800    |
| N(1)-C(19)   | 1.372(3)  | C(14)-H(14B) | 0.9800   | C(29)-H(29B)      | 0.9800    |
| N(1)-C(2)    | 1.472(3)  | C(14)-H(14C) | 0.9800   | C(29)-H(29C)      | 0.9800    |
| N(2)-C(1)    | 1.351(3)  | C(15)-H(15A) | 0.9800   | C(30)-C(32)       | 1.525(5)  |
| N(2)-C(5)    | 1.374(3)  | C(15)-H(15B) | 0.9800   | C(30)-C(31)       | 1.537(4)  |
| N(2)-C(4)    | 1.478(3)  | C(15)-H(15C) | 0.9800   | C(30)-H(30A)      | 1.0000    |
| N(3)-C(19)   | 1.298(3)  | C(16)-C(17)  | 1.520(5) | C(31)-H(31A)      | 0.9800    |
| N(3)-C(21)   | 1.445(3)  | C(16)-C(18)  | 1.522(4) | C(31)-H(31B)      | 0.9800    |
| N(4)-C(5)    | 1.300(3)  | C(16)-H(16A) | 1.0000   | C(31)-H(31C)      | 0.9800    |
| N(4)-C(7)    | 1.452(3)  | C(17)-H(17A) | 0.9800   | C(32)-H(32A)      | 0.9800    |
| C(2)-C(3)    | 1.505(4)  | C(17)-H(17B) | 0.9800   | C(32)-H(32B)      | 0.9800    |
| C(2)-H(2A)   | 0.9900    | C(17)-H(17C) | 0.9800   | C(32)-H(32C)      | 0.9800    |
| C(2)-H(2B)   | 0.9900    | C(18)-H(18A) | 0.9800   | C(1S)-Cl(3S)      | 1.685(6)  |
| C(3)-C(4)    | 1.517(4)  | C(18)-H(18B) | 0.9800   | C(1S)-Cl(4S)      | 1.821(5)  |
| C(3)-H(3A)   | 0.9900    | C(18)-H(18C) | 0.9800   | C(1S)-H(1S1)      | 0.9900    |
| C(3)-H(3B)   | 0.9900    | C(19)-C(20)  | 1.490(4) | C(1S)-H(1S2)      | 0.9900    |
| C(4)-H(4A)   | 0.9900    | C(20)-H(20A) | 0.9800   | C(2S)-Cl(5S)      | 1.714(4)  |
| C(4)-H(4B)   | 0.9900    | C(20)-H(20B) | 0.9800   | C(2S)-Cl(6S)      | 1.777(4)  |
| C(5)-C(6)    | 1.486(3)  | C(20)-H(20C) | 0.9800   | C(2S)-H(2S1)      | 0.9900    |
| C(6)-H(6A)   | 0.9800    | C(21)-C(22)  | 1.402(4) | C(2S)-H(2S2)      | 0.9900    |
| C(6)-H(6B)   | 0.9800    | C(21)-C(26)  | 1.404(4) | C(1)-Fe(1)-N(3)   | 78.02(10) |
| C(6)-H(6C)   | 0.9800    | C(22)-C(23)  | 1.389(5) | C(1)-Fe(1)-N(4)   | 77.76(9)  |
| C(7)-C(12)   | 1.401(4)  | C(22)-C(27)  | 1.521(5) | N(3)-Fe(1)-N(4)   | 146.12(8) |
| C(7)-C(8)    | 1.401(4)  | C(23)-C(24)  | 1.374(5) | C(1)-Fe(1)-Cl(2)  | 157.99(9) |
| C(8)-C(9)    | 1.404(4)  | C(23)-H(23A) | 0.9500   | N(3)-Fe(1)-Cl(2)  | 95.08(6)  |
| C(8)-C(13)   | 1.513(4)  | C(24)-C(25)  | 1.376(5) | N(4)-Fe(1)-Cl(2)  | 98.58(6)  |
| C(9)-C(10)   | 1.376(4)  | C(24)-H(24A) | 0.9500   | C(1)-Fe(1)-Cl(1)  | 94.79(9)  |
| C(9)-H(9A)   | 0.9500    | C(25)-C(26)  | 1.399(4) | N(3)-Fe(1)-Cl(1)  | 103.63(7) |
| C(10)-C(11)  | 1.374(4)  | C(25)-H(25A) | 0.9500   | N(4)-Fe(1)-Cl(1)  | 101.68(6) |
| C(10)-H(10A) | 0.9500    | C(26)-C(30)  | 1.504(4) | Cl(2)-Fe(1)-Cl(1) | 107.18(3) |
| C(11)-C(12)  | 1.391(4)  | C(27)-C(28)  | 1.515(6) | C(1)-N(1)-C(19)   | 112.3(2)  |



|                  |            |                     |          |                     |          |
|------------------|------------|---------------------|----------|---------------------|----------|
| C(1)-N(1)-C(2)   | 122.6(2)   | H(6A)-C(6)-H(6B)    | 109.5    | C(13)-C(15)-H(15C)  | 109.5    |
| C(19)-N(1)-C(2)  | 124.9(2)   | C(5)-C(6)-H(6C)     | 109.5    | H(15A)-C(15)-H(15C) | 109.5    |
| C(1)-N(2)-C(5)   | 112.2(2)   | H(6A)-C(6)-H(6C)    | 109.5    | H(15B)-C(15)-H(15C) | 109.5    |
| C(1)-N(2)-C(4)   | 122.5(2)   | H(6B)-C(6)-H(6C)    | 109.5    | C(17)-C(16)-C(18)   | 110.8(3) |
| C(5)-N(2)-C(4)   | 125.1(2)   | C(12)-C(7)-C(8)     | 122.1(2) | C(17)-C(16)-C(12)   | 110.3(3) |
| C(19)-N(3)-C(21) | 119.0(2)   | C(12)-C(7)-N(4)     | 118.6(2) | C(18)-C(16)-C(12)   | 111.8(2) |
| C(19)-N(3)-Fe(1) | 113.44(17) | C(8)-C(7)-N(4)      | 119.3(2) | C(17)-C(16)-H(16A)  | 107.9    |
| C(21)-N(3)-Fe(1) | 127.53(16) | C(7)-C(8)-C(9)      | 117.5(2) | C(18)-C(16)-H(16A)  | 107.9    |
| C(5)-N(4)-C(7)   | 118.0(2)   | C(7)-C(8)-C(13)     | 123.7(2) | C(12)-C(16)-H(16A)  | 107.9    |
| C(5)-N(4)-Fe(1)  | 113.51(16) | C(9)-C(8)-C(13)     | 118.9(2) | C(16)-C(17)-H(17A)  | 109.5    |
| C(7)-N(4)-Fe(1)  | 127.96(15) | C(10)-C(9)-C(8)     | 121.1(3) | C(16)-C(17)-H(17B)  | 109.5    |
| N(2)-C(1)-N(1)   | 120.0(2)   | C(10)-C(9)-H(9A)    | 119.5    | H(17A)-C(17)-H(17B) | 109.5    |
| N(2)-C(1)-Fe(1)  | 120.33(18) | C(8)-C(9)-H(9A)     | 119.5    | C(16)-C(17)-H(17C)  | 109.5    |
| N(1)-C(1)-Fe(1)  | 119.59(18) | C(11)-C(10)-C(9)    | 120.1(2) | H(17A)-C(17)-H(17C) | 109.5    |
| N(1)-C(2)-C(3)   | 108.7(2)   | C(11)-C(10)-H(10A)  | 119.9    | H(17B)-C(17)-H(17C) | 109.5    |
| N(1)-C(2)-H(2A)  | 109.9      | C(9)-C(10)-H(10A)   | 119.9    | C(16)-C(18)-H(18A)  | 109.5    |
| C(3)-C(2)-H(2A)  | 109.9      | C(10)-C(11)-C(12)   | 121.6(3) | C(16)-C(18)-H(18B)  | 109.5    |
| N(1)-C(2)-H(2B)  | 109.9      | C(10)-C(11)-H(11A)  | 119.2    | H(18A)-C(18)-H(18B) | 109.5    |
| C(3)-C(2)-H(2B)  | 109.9      | C(12)-C(11)-H(11A)  | 119.2    | C(16)-C(18)-H(18C)  | 109.5    |
| H(2A)-C(2)-H(2B) | 108.3      | C(11)-C(12)-C(7)    | 117.6(3) | H(18A)-C(18)-H(18C) | 109.5    |
| C(2)-C(3)-C(4)   | 111.1(2)   | C(11)-C(12)-C(16)   | 120.5(3) | H(18B)-C(18)-H(18C) | 109.5    |
| C(2)-C(3)-H(3A)  | 109.4      | C(7)-C(12)-C(16)    | 121.9(2) | N(3)-C(19)-N(1)     | 115.1(2) |
| C(4)-C(3)-H(3A)  | 109.4      | C(8)-C(13)-C(15)    | 111.4(2) | N(3)-C(19)-C(20)    | 126.6(2) |
| C(2)-C(3)-H(3B)  | 109.4      | C(8)-C(13)-C(14)    | 112.2(2) | N(1)-C(19)-C(20)    | 118.2(2) |
| C(4)-C(3)-H(3B)  | 109.4      | C(15)-C(13)-C(14)   | 109.5(2) | C(19)-C(20)-H(20A)  | 109.5    |
| H(3A)-C(3)-H(3B) | 108.0      | C(8)-C(13)-H(13A)   | 107.9    | C(19)-C(20)-H(20B)  | 109.5    |
| N(2)-C(4)-C(3)   | 108.0(2)   | C(15)-C(13)-H(13A)  | 107.9    | H(20A)-C(20)-H(20B) | 109.5    |
| N(2)-C(4)-H(4A)  | 110.1      | C(14)-C(13)-H(13A)  | 107.9    | C(19)-C(20)-H(20C)  | 109.5    |
| C(3)-C(4)-H(4A)  | 110.1      | C(13)-C(14)-H(14A)  | 109.5    | H(20A)-C(20)-H(20C) | 109.5    |
| N(2)-C(4)-H(4B)  | 110.1      | C(13)-C(14)-H(14B)  | 109.5    | H(20B)-C(20)-H(20C) | 109.5    |
| C(3)-C(4)-H(4B)  | 110.1      | H(14A)-C(14)-H(14B) | 109.5    | C(22)-C(21)-C(26)   | 121.9(3) |
| H(4A)-C(4)-H(4B) | 108.4      | C(13)-C(14)-H(14C)  | 109.5    | C(22)-C(21)-N(3)    | 118.5(3) |
| N(4)-C(5)-N(2)   | 115.1(2)   | H(14A)-C(14)-H(14C) | 109.5    | C(26)-C(21)-N(3)    | 119.6(3) |
| N(4)-C(5)-C(6)   | 126.8(2)   | H(14B)-C(14)-H(14C) | 109.5    | C(23)-C(22)-C(21)   | 117.7(3) |
| N(2)-C(5)-C(6)   | 118.1(2)   | C(13)-C(15)-H(15A)  | 109.5    | C(23)-C(22)-C(27)   | 119.9(3) |
| C(5)-C(6)-H(6A)  | 109.5      | C(13)-C(15)-H(15B)  | 109.5    | C(21)-C(22)-C(27)   | 122.4(3) |
| C(5)-C(6)-H(6B)  | 109.5      | H(15A)-C(15)-H(15B) | 109.5    | C(24)-C(23)-C(22)   | 121.7(3) |

|                     |          |                     |          |
|---------------------|----------|---------------------|----------|
| C(24)-C(23)-H(23A)  | 119.1    | C(30)-C(31)-H(31B)  | 109.5    |
| C(22)-C(23)-H(23A)  | 119.1    | H(31A)-C(31)-H(31B) | 109.5    |
| C(23)-C(24)-C(25)   | 119.8(3) | C(30)-C(31)-H(31C)  | 109.5    |
| C(23)-C(24)-H(24A)  | 120.1    | H(31A)-C(31)-H(31C) | 109.5    |
| C(25)-C(24)-H(24A)  | 120.1    | H(31B)-C(31)-H(31C) | 109.5    |
| C(24)-C(25)-C(26)   | 121.5(3) | C(30)-C(32)-H(32A)  | 109.5    |
| C(24)-C(25)-H(25A)  | 119.3    | C(30)-C(32)-H(32B)  | 109.5    |
| C(26)-C(25)-H(25A)  | 119.3    | H(32A)-C(32)-H(32B) | 109.5    |
| C(25)-C(26)-C(21)   | 117.4(3) | C(30)-C(32)-H(32C)  | 109.5    |
| C(25)-C(26)-C(30)   | 119.2(3) | H(32A)-C(32)-H(32C) | 109.5    |
| C(21)-C(26)-C(30)   | 123.4(2) | H(32B)-C(32)-H(32C) | 109.5    |
| C(28)-C(27)-C(22)   | 111.4(3) | Cl(3S)-C(1S)-Cl(4S) | 111.4(2) |
| C(28)-C(27)-C(29)   | 110.8(3) | Cl(3S)-C(1S)-H(1S1) | 109.3    |
| C(22)-C(27)-C(29)   | 111.6(3) | Cl(4S)-C(1S)-H(1S1) | 109.3    |
| C(28)-C(27)-H(27A)  | 107.6    | Cl(3S)-C(1S)-H(1S2) | 109.3    |
| C(22)-C(27)-H(27A)  | 107.6    | Cl(4S)-C(1S)-H(1S2) | 109.3    |
| C(29)-C(27)-H(27A)  | 107.6    | H(1S1)-C(1S)-H(1S2) | 108.0    |
| C(27)-C(28)-H(28A)  | 109.5    | Cl(5S)-C(2S)-Cl(6S) | 110.7(2) |
| C(27)-C(28)-H(28B)  | 109.5    | Cl(5S)-C(2S)-H(2S1) | 109.5    |
| H(28A)-C(28)-H(28B) | 109.5    | Cl(6S)-C(2S)-H(2S1) | 109.5    |
| C(27)-C(28)-H(28C)  | 109.5    | Cl(5S)-C(2S)-H(2S2) | 109.5    |
| H(28A)-C(28)-H(28C) | 109.5    | Cl(6S)-C(2S)-H(2S2) | 109.5    |
| H(28B)-C(28)-H(28C) | 109.5    | H(2S1)-C(2S)-H(2S2) | 108.1    |
| C(27)-C(29)-H(29A)  | 109.5    |                     |          |
| C(27)-C(29)-H(29B)  | 109.5    |                     |          |
| H(29A)-C(29)-H(29B) | 109.5    |                     |          |
| C(27)-C(29)-H(29C)  | 109.5    |                     |          |
| H(29A)-C(29)-H(29C) | 109.5    |                     |          |
| H(29B)-C(29)-H(29C) | 109.5    |                     |          |
| C(26)-C(30)-C(32)   | 112.1(3) |                     |          |
| C(26)-C(30)-C(31)   | 110.4(3) |                     |          |
| C(32)-C(30)-C(31)   | 110.8(3) |                     |          |
| C(26)-C(30)-H(30A)  | 107.8    |                     |          |
| C(32)-C(30)-H(30A)  | 107.8    |                     |          |
| C(31)-C(30)-H(30A)  | 107.8    |                     |          |
| C(30)-C(31)-H(31A)  | 109.5    |                     |          |

**Table S8.** Anisotropic displacement parameters ( $\text{\AA}^2 \times 10^3$ ) for  $(\text{CDA}^{\text{Pr}})\text{FeCl}_2$  (**2a**) at 150 K. The anisotropic displacement factor exponent takes the form:  $-2p^2[h^2a^*2U^{11}+\dots+2hka^*b^*U^{12}]$ .

|        | $U^{11}$ | $U^{22}$ | $U^{33}$ | $U^{23}$ | $U^{13}$ | $U^{12}$ |
|--------|----------|----------|----------|----------|----------|----------|
| Fe(1)  | 37(1)    | 21(1)    | 24(1)    | -1(1)    | 2(1)     | -1(1)    |
| Cl(1)  | 38(1)    | 30(1)    | 52(1)    | 1(1)     | 4(1)     | -2(1)    |
| Cl(2)  | 67(1)    | 35(1)    | 24(1)    | -1(1)    | -9(1)    | 1(1)     |
| N(1)   | 44(1)    | 25(1)    | 22(1)    | -3(1)    | -1(1)    | -4(1)    |
| N(2)   | 37(1)    | 27(1)    | 18(1)    | 1(1)     | 0(1)     | 0(1)     |
| N(3)   | 41(1)    | 24(1)    | 23(1)    | -2(1)    | -1(1)    | 0(1)     |
| N(4)   | 31(1)    | 22(1)    | 21(1)    | 0(1)     | 2(1)     | 1(1)     |
| C(1)   | 37(1)    | 26(1)    | 24(1)    | -1(1)    | 0(1)     | -3(1)    |
| C(2)   | 49(2)    | 38(2)    | 20(1)    | -5(1)    | -3(1)    | -8(1)    |
| C(3)   | 37(1)    | 45(2)    | 21(1)    | -1(1)    | -2(1)    | -2(1)    |
| C(4)   | 39(1)    | 36(1)    | 19(1)    | 3(1)     | 1(1)     | 2(1)     |
| C(5)   | 30(1)    | 23(1)    | 23(1)    | 0(1)     | 4(1)     | 3(1)     |
| C(6)   | 49(2)    | 26(1)    | 28(1)    | 4(1)     | 2(1)     | -1(1)    |
| C(7)   | 34(1)    | 23(1)    | 22(1)    | 0(1)     | 0(1)     | -3(1)    |
| C(8)   | 36(1)    | 22(1)    | 24(1)    | 1(1)     | 2(1)     | -3(1)    |
| C(9)   | 44(2)    | 26(1)    | 33(1)    | -5(1)    | 5(1)     | 0(1)     |
| C(10)  | 49(2)    | 35(2)    | 34(1)    | -11(1)   | -1(1)    | -11(1)   |
| C(11)  | 36(2)    | 44(2)    | 37(2)    | -4(1)    | -2(1)    | -11(1)   |
| C(12)  | 34(1)    | 38(1)    | 26(1)    | -1(1)    | 0(1)     | -2(1)    |
| C(13)  | 34(1)    | 26(1)    | 27(1)    | -2(1)    | 3(1)     | 0(1)     |
| C(14)  | 40(2)    | 32(1)    | 39(2)    | 1(1)     | 0(1)     | 2(1)     |
| C(15)  | 39(2)    | 49(2)    | 36(1)    | 5(1)     | 5(1)     | -7(1)    |
| C(16)  | 32(2)    | 52(2)    | 40(2)    | -10(1)   | -2(1)    | 1(1)     |
| C(17)  | 47(2)    | 96(3)    | 52(2)    | 0(2)     | 13(2)    | 7(2)     |
| C(18)  | 39(2)    | 61(2)    | 60(2)    | -7(2)    | -10(2)   | 9(2)     |
| C(19)  | 41(2)    | 24(1)    | 29(1)    | -2(1)    | 2(1)     | -5(1)    |
| C(20)  | 69(2)    | 30(1)    | 38(2)    | -8(1)    | -7(1)    | -2(1)    |
| C(21)  | 50(2)    | 25(1)    | 26(1)    | -4(1)    | -2(1)    | 2(1)     |
| C(22)  | 51(2)    | 40(2)    | 40(2)    | -4(1)    | -3(1)    | 6(1)     |
| C(23)  | 56(2)    | 50(2)    | 50(2)    | -6(2)    | -12(2)   | 16(2)    |
| C(24)  | 74(2)    | 35(2)    | 38(2)    | -2(1)    | -12(2)   | 15(2)    |
| C(25)  | 67(2)    | 29(1)    | 30(1)    | 0(1)     | -1(1)    | 4(1)     |
| C(26)  | 54(2)    | 25(1)    | 26(1)    | -2(1)    | -2(1)    | 2(1)     |
| C(27)  | 46(2)    | 56(2)    | 68(2)    | 5(2)     | 5(2)     | 6(2)     |
| C(28)  | 63(3)    | 74(3)    | 100(3)   | -17(3)   | 6(2)     | -10(2)   |
| C(29)  | 69(3)    | 100(3)   | 71(3)    | -8(2)    | 18(2)    | -5(2)    |
| C(30)  | 54(2)    | 28(1)    | 40(2)    | 6(1)     | 8(1)     | 2(1)     |
| C(31)  | 74(2)    | 49(2)    | 53(2)    | 1(2)     | 21(2)    | 11(2)    |
| C(32)  | 56(2)    | 41(2)    | 71(2)    | 4(2)     | 0(2)     | -2(2)    |
| C(1S)  | 71(2)    | 38(2)    | 98(3)    | -1(2)    | -30(2)   | -5(2)    |
| Cl(3S) | 67(1)    | 154(3)   | 85(1)    | -15(2)   | 22(1)    | -39(2)   |
| Cl(4S) | 50(1)    | 56(1)    | 67(1)    | 4(1)     | 10(1)    | -3(1)    |
| C(2S)  | 74(2)    | 52(2)    | 41(2)    | -4(2)    | -2(2)    | -6(2)    |
| Cl(5S) | 61(1)    | 147(4)   | 68(1)    | -3(1)    | -2(1)    | -20(1)   |
| Cl(6S) | 96(2)    | 84(1)    | 56(1)    | -13(1)   | 18(1)    | 12(1)    |

**Figure S10.** ORTEP plot of  $(\text{CDA}^{\text{tPr}})\text{FeCl}_2$  (**2a**) at 200 K at 50% probability level. Hydrogen atoms and solvent molecules were excluded for clarity.

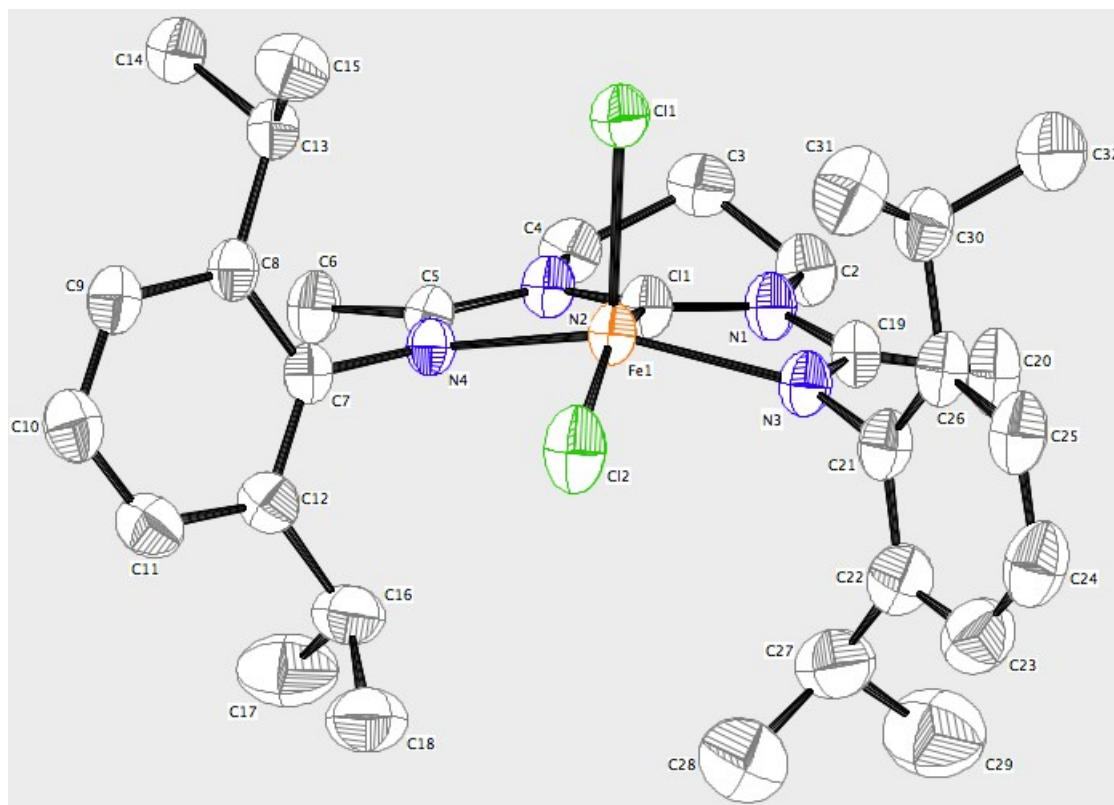

**Table S9.** Bond lengths (Å) and angles (°) for (CDA<sup>tPr</sup>)FeCl<sub>2</sub> (**2a**) at 200 K.

|              |           |              |          |                  |           |
|--------------|-----------|--------------|----------|------------------|-----------|
| Fe(1)-C(1)   | 1.850(2)  | C(11)-C(12)  | 1.391(4) | C(26)-C(30)      | 1.501(5)  |
| Fe(1)-N(3)   | 2.062(2)  | C(11)-H(11A) | 0.9500   | C(27)-C(28)      | 1.512(6)  |
| Fe(1)-N(4)   | 2.065(2)  | C(12)-C(16)  | 1.520(4) | C(27)-C(29)      | 1.532(6)  |
| Fe(1)-Cl(2)  | 2.2648(8) | C(13)-C(15)  | 1.526(4) | C(27)-H(27A)     | 1.0000    |
| Fe(1)-Cl(1)  | 2.3216(8) | C(13)-C(14)  | 1.528(4) | C(28)-H(28A)     | 0.9800    |
| N(1)-C(1)    | 1.354(3)  | C(13)-H(13A) | 1.0000   | C(28)-H(28B)     | 0.9800    |
| N(1)-C(19)   | 1.378(3)  | C(14)-H(14A) | 0.9800   | C(28)-H(28C)     | 0.9800    |
| N(1)-C(2)    | 1.470(3)  | C(14)-H(14B) | 0.9800   | C(29)-H(29A)     | 0.9800    |
| N(2)-C(1)    | 1.351(3)  | C(14)-H(14C) | 0.9800   | C(29)-H(29B)     | 0.9800    |
| N(2)-C(5)    | 1.374(3)  | C(15)-H(15A) | 0.9800   | C(29)-H(29C)     | 0.9800    |
| N(2)-C(4)    | 1.478(3)  | C(15)-H(15B) | 0.9800   | C(30)-C(32)      | 1.526(5)  |
| N(3)-C(19)   | 1.293(3)  | C(15)-H(15C) | 0.9800   | C(30)-C(31)      | 1.533(5)  |
| N(3)-C(21)   | 1.444(3)  | C(16)-C(17)  | 1.518(5) | C(30)-H(30A)     | 1.0000    |
| N(4)-C(5)    | 1.299(3)  | C(16)-C(18)  | 1.523(5) | C(31)-H(31A)     | 0.9800    |
| N(4)-C(7)    | 1.450(3)  | C(16)-H(16A) | 1.0000   | C(31)-H(31B)     | 0.9800    |
| C(2)-C(3)    | 1.503(4)  | C(17)-H(17A) | 0.9800   | C(31)-H(31C)     | 0.9800    |
| C(2)-H(2A)   | 0.9900    | C(17)-H(17B) | 0.9800   | C(32)-H(32A)     | 0.9800    |
| C(2)-H(2B)   | 0.9900    | C(17)-H(17C) | 0.9800   | C(32)-H(32B)     | 0.9800    |
| C(3)-C(4)    | 1.515(4)  | C(18)-H(18A) | 0.9800   | C(32)-H(32C)     | 0.9800    |
| C(3)-H(3A)   | 0.9900    | C(18)-H(18B) | 0.9800   | C(1S)-Cl(3S)     | 1.665(7)  |
| C(3)-H(3B)   | 0.9900    | C(18)-H(18C) | 0.9800   | C(1S)-Cl(4S)     | 1.834(5)  |
| C(4)-H(4A)   | 0.9900    | C(19)-C(20)  | 1.492(4) | C(1S)-H(1S1)     | 0.9900    |
| C(4)-H(4B)   | 0.9900    | C(20)-H(20A) | 0.9800   | C(1S)-H(1S2)     | 0.9900    |
| C(5)-C(6)    | 1.485(3)  | C(20)-H(20B) | 0.9800   | C(2S)-Cl(5S)     | 1.693(5)  |
| C(6)-H(6A)   | 0.9800    | C(20)-H(20C) | 0.9800   | C(2S)-Cl(6S)     | 1.775(5)  |
| C(6)-H(6B)   | 0.9800    | C(21)-C(22)  | 1.400(5) | C(2S)-H(2S1)     | 0.9900    |
| C(6)-H(6C)   | 0.9800    | C(21)-C(26)  | 1.401(4) | C(2S)-H(2S2)     | 0.9900    |
| C(7)-C(8)    | 1.400(4)  | C(22)-C(23)  | 1.390(5) | C(1)-Fe(1)-N(3)  | 77.34(10) |
| C(7)-C(12)   | 1.401(4)  | C(22)-C(27)  | 1.520(5) | C(1)-Fe(1)-N(4)  | 77.27(9)  |
| C(8)-C(9)    | 1.401(4)  | C(23)-C(24)  | 1.374(5) | N(3)-Fe(1)-N(4)  | 145.88(8) |
| C(8)-C(13)   | 1.513(4)  | C(23)-H(23A) | 0.9500   | C(1)-Fe(1)-Cl(2) | 156.89(9) |
| C(9)-C(10)   | 1.374(4)  | C(24)-C(25)  | 1.365(5) | N(3)-Fe(1)-Cl(2) | 95.44(6)  |
| C(9)-H(9A)   | 0.9500    | C(24)-H(24A) | 0.9500   | N(4)-Fe(1)-Cl(2) | 99.05(6)  |
| C(10)-C(11)  | 1.374(5)  | C(25)-C(26)  | 1.400(4) | C(1)-Fe(1)-Cl(1) | 94.76(9)  |
| C(10)-H(10A) | 0.9500    | C(25)-H(25A) | 0.9500   | N(3)-Fe(1)-Cl(1) | 103.17(7) |

|                   |            |                     |          |                     |          |
|-------------------|------------|---------------------|----------|---------------------|----------|
| N(4)-Fe(1)-Cl(1)  | 101.31(6)  | N(2)-C(5)-C(6)      | 118.2(2) | C(13)-C(15)-H(15A)  | 109.5    |
| Cl(2)-Fe(1)-Cl(1) | 108.30(3)  | C(5)-C(6)-H(6A)     | 109.5    | C(13)-C(15)-H(15B)  | 109.5    |
| C(1)-N(1)-C(19)   | 112.3(2)   | C(5)-C(6)-H(6B)     | 109.5    | H(15A)-C(15)-H(15B) | 109.5    |
| C(1)-N(1)-C(2)    | 122.8(2)   | H(6A)-C(6)-H(6B)    | 109.5    | C(13)-C(15)-H(15C)  | 109.5    |
| C(19)-N(1)-C(2)   | 124.7(2)   | C(5)-C(6)-H(6C)     | 109.5    | H(15A)-C(15)-H(15C) | 109.5    |
| C(1)-N(2)-C(5)    | 112.5(2)   | H(6A)-C(6)-H(6C)    | 109.5    | H(15B)-C(15)-H(15C) | 109.5    |
| C(1)-N(2)-C(4)    | 122.5(2)   | H(6B)-C(6)-H(6C)    | 109.5    | C(17)-C(16)-C(12)   | 110.6(3) |
| C(5)-N(2)-C(4)    | 124.8(2)   | C(8)-C(7)-C(12)     | 122.0(2) | C(17)-C(16)-C(18)   | 110.9(3) |
| C(19)-N(3)-C(21)  | 119.2(2)   | C(8)-C(7)-N(4)      | 119.5(2) | C(12)-C(16)-C(18)   | 111.7(3) |
| C(19)-N(3)-Fe(1)  | 113.38(17) | C(12)-C(7)-N(4)     | 118.6(2) | C(17)-C(16)-H(16A)  | 107.8    |
| C(21)-N(3)-Fe(1)  | 127.42(16) | C(7)-C(8)-C(9)      | 117.5(2) | C(12)-C(16)-H(16A)  | 107.8    |
| C(5)-N(4)-C(7)    | 118.4(2)   | C(7)-C(8)-C(13)     | 123.5(2) | C(18)-C(16)-H(16A)  | 107.8    |
| C(5)-N(4)-Fe(1)   | 113.30(16) | C(9)-C(8)-C(13)     | 119.0(2) | C(16)-C(17)-H(17A)  | 109.5    |
| C(7)-N(4)-Fe(1)   | 127.86(15) | C(10)-C(9)-C(8)     | 121.3(3) | C(16)-C(17)-H(17B)  | 109.5    |
| N(2)-C(1)-N(1)    | 120.0(2)   | C(10)-C(9)-H(9A)    | 119.4    | H(17A)-C(17)-H(17B) | 109.5    |
| N(2)-C(1)-Fe(1)   | 120.20(18) | C(8)-C(9)-H(9A)     | 119.4    | C(16)-C(17)-H(17C)  | 109.5    |
| N(1)-C(1)-Fe(1)   | 119.85(18) | C(11)-C(10)-C(9)    | 120.0(3) | H(17A)-C(17)-H(17C) | 109.5    |
| N(1)-C(2)-C(3)    | 108.7(2)   | C(11)-C(10)-H(10A)  | 120.0    | H(17B)-C(17)-H(17C) | 109.5    |
| N(1)-C(2)-H(2A)   | 110.0      | C(9)-C(10)-H(10A)   | 120.0    | C(16)-C(18)-H(18A)  | 109.5    |
| C(3)-C(2)-H(2A)   | 110.0      | C(10)-C(11)-C(12)   | 121.6(3) | C(16)-C(18)-H(18B)  | 109.5    |
| N(1)-C(2)-H(2B)   | 110.0      | C(10)-C(11)-H(11A)  | 119.2    | H(18A)-C(18)-H(18B) | 109.5    |
| C(3)-C(2)-H(2B)   | 110.0      | C(12)-C(11)-H(11A)  | 119.2    | C(16)-C(18)-H(18C)  | 109.5    |
| H(2A)-C(2)-H(2B)  | 108.3      | C(11)-C(12)-C(7)    | 117.7(3) | H(18A)-C(18)-H(18C) | 109.5    |
| C(2)-C(3)-C(4)    | 111.1(2)   | C(11)-C(12)-C(16)   | 120.1(3) | H(18B)-C(18)-H(18C) | 109.5    |
| C(2)-C(3)-H(3A)   | 109.4      | C(7)-C(12)-C(16)    | 122.2(2) | N(3)-C(19)-N(1)     | 115.4(2) |
| C(4)-C(3)-H(3A)   | 109.4      | C(8)-C(13)-C(15)    | 111.3(2) | N(3)-C(19)-C(20)    | 126.4(2) |
| C(2)-C(3)-H(3B)   | 109.4      | C(8)-C(13)-C(14)    | 112.3(2) | N(1)-C(19)-C(20)    | 118.1(2) |
| C(4)-C(3)-H(3B)   | 109.4      | C(15)-C(13)-C(14)   | 109.7(2) | C(19)-C(20)-H(20A)  | 109.5    |
| H(3A)-C(3)-H(3B)  | 108.0      | C(8)-C(13)-H(13A)   | 107.8    | C(19)-C(20)-H(20B)  | 109.5    |
| N(2)-C(4)-C(3)    | 108.1(2)   | C(15)-C(13)-H(13A)  | 107.8    | H(20A)-C(20)-H(20B) | 109.5    |
| N(2)-C(4)-H(4A)   | 110.1      | C(14)-C(13)-H(13A)  | 107.8    | C(19)-C(20)-H(20C)  | 109.5    |
| C(3)-C(4)-H(4A)   | 110.1      | C(13)-C(14)-H(14A)  | 109.5    | H(20A)-C(20)-H(20C) | 109.5    |
| N(2)-C(4)-H(4B)   | 110.1      | C(13)-C(14)-H(14B)  | 109.5    | H(20B)-C(20)-H(20C) | 109.5    |
| C(3)-C(4)-H(4B)   | 110.1      | H(14A)-C(14)-H(14B) | 109.5    | C(22)-C(21)-C(26)   | 121.9(3) |
| H(4A)-C(4)-H(4B)  | 108.4      | C(13)-C(14)-H(14C)  | 109.5    | C(22)-C(21)-N(3)    | 118.5(3) |
| N(4)-C(5)-N(2)    | 115.4(2)   | H(14A)-C(14)-H(14C) | 109.5    | C(26)-C(21)-N(3)    | 119.5(3) |
| N(4)-C(5)-C(6)    | 126.4(2)   | H(14B)-C(14)-H(14C) | 109.5    | C(23)-C(22)-C(21)   | 117.6(3) |

|                     |          |                     |          |
|---------------------|----------|---------------------|----------|
| C(23)-C(22)-C(27)   | 119.7(3) | C(31)-C(30)-H(30A)  | 107.7    |
| C(21)-C(22)-C(27)   | 122.7(3) | C(30)-C(31)-H(31A)  | 109.5    |
| C(24)-C(23)-C(22)   | 121.7(3) | C(30)-C(31)-H(31B)  | 109.5    |
| C(24)-C(23)-H(23A)  | 119.2    | H(31A)-C(31)-H(31B) | 109.5    |
| C(22)-C(23)-H(23A)  | 119.2    | C(30)-C(31)-H(31C)  | 109.5    |
| C(25)-C(24)-C(23)   | 119.8(3) | H(31A)-C(31)-H(31C) | 109.5    |
| C(25)-C(24)-H(24A)  | 120.1    | H(31B)-C(31)-H(31C) | 109.5    |
| C(23)-C(24)-H(24A)  | 120.1    | C(30)-C(32)-H(32A)  | 109.5    |
| C(24)-C(25)-C(26)   | 121.7(3) | C(30)-C(32)-H(32B)  | 109.5    |
| C(24)-C(25)-H(25A)  | 119.1    | H(32A)-C(32)-H(32B) | 109.5    |
| C(26)-C(25)-H(25A)  | 119.1    | C(30)-C(32)-H(32C)  | 109.5    |
| C(25)-C(26)-C(21)   | 117.2(3) | H(32A)-C(32)-H(32C) | 109.5    |
| C(25)-C(26)-C(30)   | 119.4(3) | H(32B)-C(32)-H(32C) | 109.5    |
| C(21)-C(26)-C(30)   | 123.3(3) | Cl(3S)-C(1S)-Cl(4S) | 111.2(3) |
| C(28)-C(27)-C(22)   | 111.4(4) | Cl(3S)-C(1S)-H(1S1) | 109.4    |
| C(28)-C(27)-C(29)   | 110.8(4) | Cl(4S)-C(1S)-H(1S1) | 109.4    |
| C(22)-C(27)-C(29)   | 111.8(4) | Cl(3S)-C(1S)-H(1S2) | 109.4    |
| C(28)-C(27)-H(27A)  | 107.6    | Cl(4S)-C(1S)-H(1S2) | 109.4    |
| C(22)-C(27)-H(27A)  | 107.6    | H(1S1)-C(1S)-H(1S2) | 108.0    |
| C(29)-C(27)-H(27A)  | 107.6    | Cl(5S)-C(2S)-Cl(6S) | 111.5(3) |
| C(27)-C(28)-H(28A)  | 109.5    | Cl(5S)-C(2S)-H(2S1) | 109.3    |
| C(27)-C(28)-H(28B)  | 109.5    | Cl(6S)-C(2S)-H(2S1) | 109.3    |
| H(28A)-C(28)-H(28B) | 109.5    | Cl(5S)-C(2S)-H(2S2) | 109.3    |
| C(27)-C(28)-H(28C)  | 109.5    | Cl(6S)-C(2S)-H(2S2) | 109.3    |
| H(28A)-C(28)-H(28C) | 109.5    | H(2S1)-C(2S)-H(2S2) | 108.0    |
| H(28B)-C(28)-H(28C) | 109.5    |                     |          |
| C(27)-C(29)-H(29A)  | 109.5    |                     |          |
| C(27)-C(29)-H(29B)  | 109.5    |                     |          |
| H(29A)-C(29)-H(29B) | 109.5    |                     |          |
| C(27)-C(29)-H(29C)  | 109.5    |                     |          |
| H(29A)-C(29)-H(29C) | 109.5    |                     |          |
| H(29B)-C(29)-H(29C) | 109.5    |                     |          |
| C(26)-C(30)-C(32)   | 112.1(3) |                     |          |
| C(26)-C(30)-C(31)   | 110.5(3) |                     |          |
| C(32)-C(30)-C(31)   | 110.9(3) |                     |          |
| C(26)-C(30)-H(30A)  | 107.7    |                     |          |
| C(32)-C(30)-H(30A)  | 107.7    |                     |          |

**Table S10.** Anisotropic displacement parameters ( $\text{\AA}^2 \times 10^3$ ) for  $(\text{CDA}^{\text{IPr}})\text{FeCl}_2$  (**2a**) at 200 K. The anisotropic displacement factor exponent takes the form:  $-2p^2[h^2a^*2U^{11}+\dots+2hka^*b^*U^{12}]$ .

|        | $U^{11}$ | $U^{22}$ | $U^{33}$ | $U^{23}$ | $U^{13}$ | $U^{12}$ |
|--------|----------|----------|----------|----------|----------|----------|
| Fe(1)  | 44(1)    | 25(1)    | 32(1)    | -2(1)    | 1(1)     | 0(1)     |
| Cl(1)  | 45(1)    | 36(1)    | 68(1)    | 2(1)     | 5(1)     | -2(1)    |
| Cl(2)  | 89(1)    | 44(1)    | 29(1)    | -2(1)    | -12(1)   | -1(1)    |
| N(1)   | 52(1)    | 31(1)    | 27(1)    | -4(1)    | -1(1)    | -4(1)    |
| N(2)   | 44(1)    | 32(1)    | 23(1)    | 1(1)     | 1(1)     | 0(1)     |
| N(3)   | 49(1)    | 32(1)    | 29(1)    | -3(1)    | -2(1)    | 1(1)     |
| N(4)   | 37(1)    | 27(1)    | 27(1)    | 0(1)     | 2(1)     | -1(1)    |
| C(1)   | 45(1)    | 31(1)    | 28(1)    | 0(1)     | 1(1)     | -2(1)    |
| C(2)   | 59(2)    | 45(2)    | 25(1)    | -6(1)    | -3(1)    | -9(1)    |
| C(3)   | 45(2)    | 55(2)    | 26(1)    | -1(1)    | -3(1)    | -1(1)    |
| C(4)   | 49(2)    | 44(2)    | 23(1)    | 3(1)     | 1(1)     | 3(1)     |
| C(5)   | 37(1)    | 27(1)    | 28(1)    | 0(1)     | 3(1)     | 3(1)     |
| C(6)   | 62(2)    | 29(1)    | 38(1)    | 6(1)     | 1(1)     | 0(1)     |
| C(7)   | 42(1)    | 28(1)    | 28(1)    | 0(1)     | -1(1)    | -3(1)    |
| C(8)   | 44(1)    | 28(1)    | 31(1)    | 2(1)     | 3(1)     | -3(1)    |
| C(9)   | 53(2)    | 36(1)    | 41(1)    | -8(1)    | 5(1)     | -1(1)    |
| C(10)  | 60(2)    | 45(2)    | 45(2)    | -14(1)   | -2(1)    | -13(1)   |
| C(11)  | 45(2)    | 57(2)    | 47(2)    | -7(1)    | -4(1)    | -12(1)   |
| C(12)  | 42(2)    | 44(2)    | 34(1)    | -1(1)    | -1(1)    | -5(1)    |
| C(13)  | 41(1)    | 31(1)    | 36(1)    | -2(1)    | 3(1)     | -2(1)    |
| C(14)  | 49(2)    | 40(2)    | 51(2)    | 1(1)     | 0(1)     | 2(1)     |
| C(15)  | 50(2)    | 64(2)    | 44(2)    | 6(1)     | 7(1)     | -9(2)    |
| C(16)  | 39(2)    | 66(2)    | 53(2)    | -13(2)   | -4(1)    | 0(1)     |
| C(17)  | 59(2)    | 119(4)   | 66(2)    | 1(2)     | 18(2)    | 9(2)     |
| C(18)  | 48(2)    | 79(2)    | 77(2)    | -9(2)    | -12(2)   | 10(2)    |
| C(19)  | 49(2)    | 28(1)    | 34(1)    | -3(1)    | 3(1)     | -5(1)    |
| C(20)  | 88(2)    | 33(2)    | 51(2)    | -12(1)   | -10(2)   | -1(2)    |
| C(21)  | 58(2)    | 34(1)    | 34(1)    | -3(1)    | -2(1)    | 4(1)     |
| C(22)  | 59(2)    | 50(2)    | 50(2)    | -3(1)    | -4(1)    | 8(2)     |
| C(23)  | 68(2)    | 63(2)    | 64(2)    | -7(2)    | -15(2)   | 21(2)    |
| C(24)  | 88(3)    | 46(2)    | 46(2)    | 0(1)     | -13(2)   | 19(2)    |
| C(25)  | 80(2)    | 37(2)    | 40(2)    | 1(1)     | -1(2)    | 4(2)     |
| C(26)  | 66(2)    | 31(1)    | 34(1)    | -2(1)    | -2(1)    | 3(1)     |
| C(27)  | 55(2)    | 70(2)    | 88(3)    | 8(2)     | 7(2)     | 9(2)     |
| C(28)  | 77(3)    | 95(3)    | 123(4)   | -20(3)   | 7(3)     | -17(3)   |
| C(29)  | 86(3)    | 127(4)   | 90(3)    | -10(3)   | 26(3)    | -4(3)    |
| C(30)  | 62(2)    | 36(2)    | 52(2)    | 8(1)     | 8(2)     | 2(1)     |
| C(31)  | 91(3)    | 62(2)    | 70(2)    | 2(2)     | 26(2)    | 14(2)    |
| C(32)  | 69(2)    | 53(2)    | 90(3)    | 3(2)     | 0(2)     | -4(2)    |
| C(1S)  | 87(3)    | 46(2)    | 121(4)   | 1(2)     | -35(3)   | -5(2)    |
| Cl(3S) | 85(2)    | 185(3)   | 111(2)   | -23(2)   | 30(1)    | -45(2)   |
| Cl(4S) | 64(1)    | 71(2)    | 89(1)    | 6(1)     | 15(1)    | -3(1)    |
| C(2S)  | 96(3)    | 68(2)    | 56(2)    | -2(2)    | -6(2)    | -8(2)    |
| Cl(5S) | 78(1)    | 167(5)   | 90(1)    | 1(1)     | -5(1)    | -21(2)   |
| Cl(6S) | 117(2)   | 121(2)   | 77(1)    | -19(1)   | 26(1)    | 12(2)    |



**Figure S11.** ORTEP plot of (CDA<sup>Pr</sup>)FeCl<sub>2</sub> (**2a**) at 250 K at 50% probability level. Hydrogen atoms and solvent molecules were excluded for clarity.

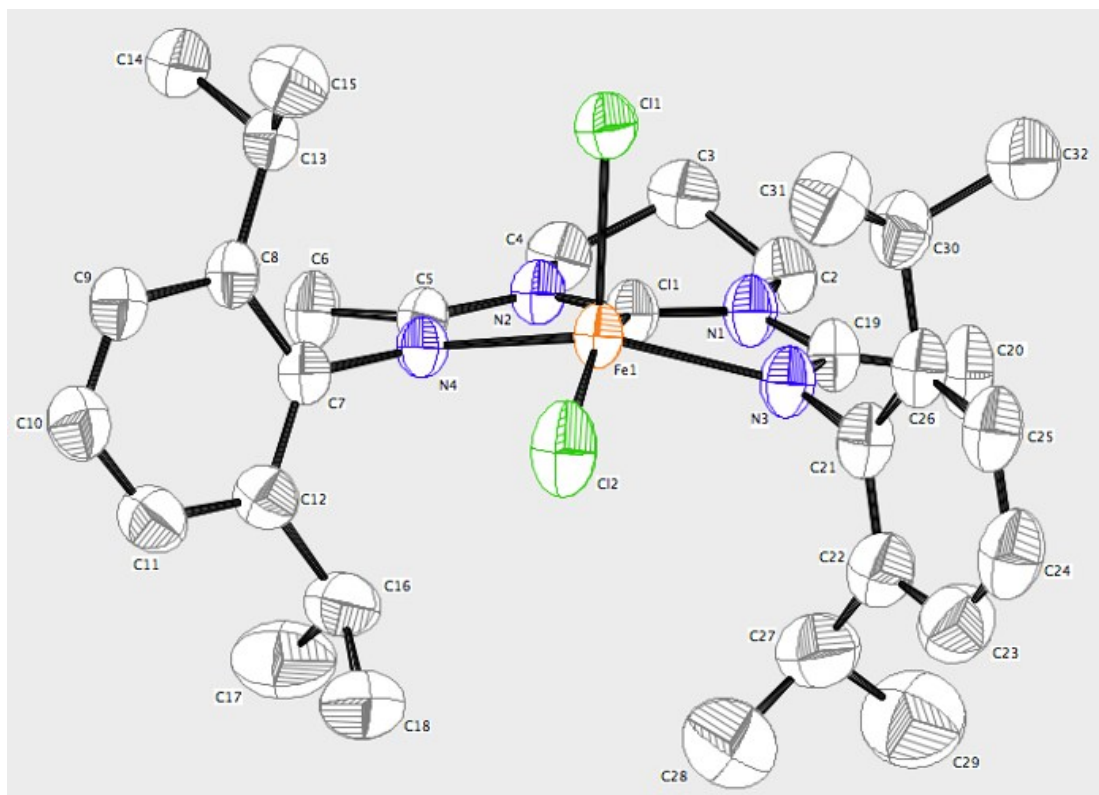

**Table S11.** Bond lengths (Å) and angles (°) for (CDA<sup>ipr</sup>)FeCl<sub>2</sub> (**2a**) at 250 K.

|              |            |              |          |                   |            |
|--------------|------------|--------------|----------|-------------------|------------|
| Fe(1)-C(1)   | 1.882(3)   | C(11)-H(11A) | 0.9400   | C(27)-C(29)       | 1.532(8)   |
| Fe(1)-N(3)   | 2.103(3)   | C(12)-C(16)  | 1.510(6) | C(27)-H(27A)      | 0.9900     |
| Fe(1)-N(4)   | 2.104(2)   | C(13)-C(15)  | 1.525(5) | C(28)-H(28A)      | 0.9700     |
| Fe(1)-Cl(2)  | 2.2574(11) | C(13)-C(14)  | 1.526(5) | C(28)-H(28B)      | 0.9700     |
| Fe(1)-Cl(1)  | 2.3214(11) | C(13)-H(13A) | 0.9900   | C(28)-H(28C)      | 0.9700     |
| N(1)-C(1)    | 1.347(4)   | C(14)-H(14A) | 0.9700   | C(29)-H(29A)      | 0.9700     |
| N(1)-C(19)   | 1.385(4)   | C(14)-H(14B) | 0.9700   | C(29)-H(29B)      | 0.9700     |
| N(1)-C(2)    | 1.470(4)   | C(14)-H(14C) | 0.9700   | C(29)-H(29C)      | 0.9700     |
| N(2)-C(1)    | 1.353(4)   | C(15)-H(15A) | 0.9700   | C(30)-C(31)       | 1.521(6)   |
| N(2)-C(5)    | 1.382(4)   | C(15)-H(15B) | 0.9700   | C(30)-C(32)       | 1.523(7)   |
| N(2)-C(4)    | 1.474(4)   | C(15)-H(15C) | 0.9700   | C(30)-H(30A)      | 0.9900     |
| N(3)-C(19)   | 1.287(4)   | C(16)-C(17)  | 1.514(7) | C(31)-H(31A)      | 0.9700     |
| N(3)-C(21)   | 1.445(5)   | C(16)-C(18)  | 1.529(6) | C(31)-H(31B)      | 0.9700     |
| N(4)-C(5)    | 1.289(4)   | C(16)-H(16A) | 0.9900   | C(31)-H(31C)      | 0.9700     |
| N(4)-C(7)    | 1.451(4)   | C(17)-H(17A) | 0.9700   | C(32)-H(32A)      | 0.9700     |
| C(2)-C(3)    | 1.507(5)   | C(17)-H(17B) | 0.9700   | C(32)-H(32B)      | 0.9700     |
| C(2)-H(2A)   | 0.9800     | C(17)-H(17C) | 0.9700   | C(32)-H(32C)      | 0.9700     |
| C(2)-H(2B)   | 0.9800     | C(18)-H(18A) | 0.9700   | C(1S)-Cl(3S)      | 1.659(9)   |
| C(3)-C(4)    | 1.512(5)   | C(18)-H(18B) | 0.9700   | C(1S)-Cl(4S)      | 1.843(7)   |
| C(3)-H(3A)   | 0.9800     | C(18)-H(18C) | 0.9700   | C(1S)-H(1S1)      | 0.9800     |
| C(3)-H(3B)   | 0.9800     | C(19)-C(20)  | 1.496(5) | C(1S)-H(1S2)      | 0.9800     |
| C(4)-H(4A)   | 0.9800     | C(20)-H(20A) | 0.9700   | C(2S)-Cl(5S)      | 1.689(7)   |
| C(4)-H(4B)   | 0.9800     | C(20)-H(20B) | 0.9700   | C(2S)-Cl(6S)      | 1.761(7)   |
| C(5)-C(6)    | 1.492(4)   | C(20)-H(20C) | 0.9700   | C(2S)-H(2S1)      | 0.9800     |
| C(6)-H(6A)   | 0.9700     | C(21)-C(26)  | 1.398(6) | C(2S)-H(2S2)      | 0.9800     |
| C(6)-H(6B)   | 0.9700     | C(21)-C(22)  | 1.401(6) | C(1)-Fe(1)-N(3)   | 76.21(12)  |
| C(6)-H(6C)   | 0.9700     | C(22)-C(23)  | 1.391(6) | C(1)-Fe(1)-N(4)   | 76.34(11)  |
| C(7)-C(8)    | 1.398(5)   | C(22)-C(27)  | 1.524(7) | N(3)-Fe(1)-N(4)   | 145.23(10) |
| C(7)-C(12)   | 1.400(5)   | C(23)-C(24)  | 1.373(7) | C(1)-Fe(1)-Cl(2)  | 154.88(11) |
| C(8)-C(9)    | 1.405(5)   | C(23)-H(23A) | 0.9400   | N(3)-Fe(1)-Cl(2)  | 95.90(8)   |
| C(8)-C(13)   | 1.514(5)   | C(24)-C(25)  | 1.359(7) | N(4)-Fe(1)-Cl(2)  | 99.97(8)   |
| C(9)-C(10)   | 1.355(6)   | C(24)-H(24A) | 0.9400   | C(1)-Fe(1)-Cl(1)  | 94.92(11)  |
| C(9)-H(9A)   | 0.9400     | C(25)-C(26)  | 1.394(5) | N(3)-Fe(1)-Cl(1)  | 102.46(9)  |
| C(10)-C(11)  | 1.381(6)   | C(25)-H(25A) | 0.9400   | N(4)-Fe(1)-Cl(1)  | 100.77(8)  |
| C(10)-H(10A) | 0.9400     | C(26)-C(30)  | 1.508(6) | Cl(2)-Fe(1)-Cl(1) | 110.13(5)  |
| C(11)-C(12)  | 1.387(5)   | C(27)-C(28)  | 1.518(9) | C(1)-N(1)-C(19)   | 112.7(3)   |

|                  |            |                     |          |                     |          |
|------------------|------------|---------------------|----------|---------------------|----------|
| C(1)-N(1)-C(2)   | 123.2(3)   | H(6A)-C(6)-H(6B)    | 109.5    | C(13)-C(15)-H(15C)  | 109.5    |
| C(19)-N(1)-C(2)  | 123.9(3)   | C(5)-C(6)-H(6C)     | 109.5    | H(15A)-C(15)-H(15C) | 109.5    |
| C(1)-N(2)-C(5)   | 112.6(2)   | H(6A)-C(6)-H(6C)    | 109.5    | H(15B)-C(15)-H(15C) | 109.5    |
| C(1)-N(2)-C(4)   | 122.9(3)   | H(6B)-C(6)-H(6C)    | 109.5    | C(12)-C(16)-C(17)   | 110.9(4) |
| C(5)-N(2)-C(4)   | 124.4(3)   | C(8)-C(7)-C(12)     | 122.0(3) | C(12)-C(16)-C(18)   | 112.0(4) |
| C(19)-N(3)-C(21) | 119.3(3)   | C(8)-C(7)-N(4)      | 119.2(3) | C(17)-C(16)-C(18)   | 110.6(4) |
| C(19)-N(3)-Fe(1) | 113.5(2)   | C(12)-C(7)-N(4)     | 118.8(3) | C(12)-C(16)-H(16A)  | 107.7    |
| C(21)-N(3)-Fe(1) | 127.1(2)   | C(7)-C(8)-C(9)      | 117.2(3) | C(17)-C(16)-H(16A)  | 107.7    |
| C(5)-N(4)-C(7)   | 118.9(3)   | C(7)-C(8)-C(13)     | 123.6(3) | C(18)-C(16)-H(16A)  | 107.7    |
| C(5)-N(4)-Fe(1)  | 113.4(2)   | C(9)-C(8)-C(13)     | 119.2(3) | C(16)-C(17)-H(17A)  | 109.5    |
| C(7)-N(4)-Fe(1)  | 127.45(19) | C(10)-C(9)-C(8)     | 121.8(4) | C(16)-C(17)-H(17B)  | 109.5    |
| N(1)-C(1)-N(2)   | 119.6(3)   | C(10)-C(9)-H(9A)    | 119.1    | H(17A)-C(17)-H(17B) | 109.5    |
| N(1)-C(1)-Fe(1)  | 120.1(2)   | C(8)-C(9)-H(9A)     | 119.1    | C(16)-C(17)-H(17C)  | 109.5    |
| N(2)-C(1)-Fe(1)  | 120.2(2)   | C(9)-C(10)-C(11)    | 119.8(3) | H(17A)-C(17)-H(17C) | 109.5    |
| N(1)-C(2)-C(3)   | 108.7(3)   | C(9)-C(10)-H(10A)   | 120.1    | H(17B)-C(17)-H(17C) | 109.5    |
| N(1)-C(2)-H(2A)  | 110.0      | C(11)-C(10)-H(10A)  | 120.1    | C(16)-C(18)-H(18A)  | 109.5    |
| C(3)-C(2)-H(2A)  | 110.0      | C(10)-C(11)-C(12)   | 121.7(4) | C(16)-C(18)-H(18B)  | 109.5    |
| N(1)-C(2)-H(2B)  | 110.0      | C(10)-C(11)-H(11A)  | 119.2    | H(18A)-C(18)-H(18B) | 109.5    |
| C(3)-C(2)-H(2B)  | 110.0      | C(12)-C(11)-H(11A)  | 119.2    | C(16)-C(18)-H(18C)  | 109.5    |
| H(2A)-C(2)-H(2B) | 108.3      | C(11)-C(12)-C(7)    | 117.5(3) | H(18A)-C(18)-H(18C) | 109.5    |
| C(2)-C(3)-C(4)   | 111.0(3)   | C(11)-C(12)-C(16)   | 120.1(3) | H(18B)-C(18)-H(18C) | 109.5    |
| C(2)-C(3)-H(3A)  | 109.4      | C(7)-C(12)-C(16)    | 122.4(3) | N(3)-C(19)-N(1)     | 115.6(3) |
| C(4)-C(3)-H(3A)  | 109.4      | C(8)-C(13)-C(15)    | 111.3(3) | N(3)-C(19)-C(20)    | 126.5(3) |
| C(2)-C(3)-H(3B)  | 109.4      | C(8)-C(13)-C(14)    | 112.2(3) | N(1)-C(19)-C(20)    | 117.9(3) |
| C(4)-C(3)-H(3B)  | 109.4      | C(15)-C(13)-C(14)   | 110.1(3) | C(19)-C(20)-H(20A)  | 109.5    |
| H(3A)-C(3)-H(3B) | 108.0      | C(8)-C(13)-H(13A)   | 107.7    | C(19)-C(20)-H(20B)  | 109.5    |
| N(2)-C(4)-C(3)   | 108.3(3)   | C(15)-C(13)-H(13A)  | 107.7    | H(20A)-C(20)-H(20B) | 109.5    |
| N(2)-C(4)-H(4A)  | 110.0      | C(14)-C(13)-H(13A)  | 107.7    | C(19)-C(20)-H(20C)  | 109.5    |
| C(3)-C(4)-H(4A)  | 110.0      | C(13)-C(14)-H(14A)  | 109.5    | H(20A)-C(20)-H(20C) | 109.5    |
| N(2)-C(4)-H(4B)  | 110.0      | C(13)-C(14)-H(14B)  | 109.5    | H(20B)-C(20)-H(20C) | 109.5    |
| C(3)-C(4)-H(4B)  | 110.0      | H(14A)-C(14)-H(14B) | 109.5    | C(26)-C(21)-C(22)   | 121.9(4) |
| H(4A)-C(4)-H(4B) | 108.4      | C(13)-C(14)-H(14C)  | 109.5    | C(26)-C(21)-N(3)    | 119.6(4) |
| N(4)-C(5)-N(2)   | 116.0(3)   | H(14A)-C(14)-H(14C) | 109.5    | C(22)-C(21)-N(3)    | 118.5(3) |
| N(4)-C(5)-C(6)   | 126.2(3)   | H(14B)-C(14)-H(14C) | 109.5    | C(23)-C(22)-C(21)   | 117.1(4) |
| N(2)-C(5)-C(6)   | 117.8(3)   | C(13)-C(15)-H(15A)  | 109.5    | C(23)-C(22)-C(27)   | 120.4(5) |
| C(5)-C(6)-H(6A)  | 109.5      | C(13)-C(15)-H(15B)  | 109.5    | C(21)-C(22)-C(27)   | 122.5(4) |
| C(5)-C(6)-H(6B)  | 109.5      | H(15A)-C(15)-H(15B) | 109.5    | C(24)-C(23)-C(22)   | 121.9(5) |

|                     |          |                     |          |
|---------------------|----------|---------------------|----------|
| C(24)-C(23)-H(23A)  | 119.0    | H(31A)-C(31)-H(31B) | 109.5    |
| C(22)-C(23)-H(23A)  | 119.0    | C(30)-C(31)-H(31C)  | 109.5    |
| C(25)-C(24)-C(23)   | 119.8(4) | H(31A)-C(31)-H(31C) | 109.5    |
| C(25)-C(24)-H(24A)  | 120.1    | H(31B)-C(31)-H(31C) | 109.5    |
| C(23)-C(24)-H(24A)  | 120.1    | C(30)-C(32)-H(32A)  | 109.5    |
| C(24)-C(25)-C(26)   | 121.7(4) | C(30)-C(32)-H(32B)  | 109.5    |
| C(24)-C(25)-H(25A)  | 119.1    | H(32A)-C(32)-H(32B) | 109.5    |
| C(26)-C(25)-H(25A)  | 119.1    | C(30)-C(32)-H(32C)  | 109.5    |
| C(25)-C(26)-C(21)   | 117.6(4) | H(32A)-C(32)-H(32C) | 109.5    |
| C(25)-C(26)-C(30)   | 119.2(4) | H(32B)-C(32)-H(32C) | 109.5    |
| C(21)-C(26)-C(30)   | 123.3(3) | Cl(3S)-C(1S)-Cl(4S) | 110.3(3) |
| C(28)-C(27)-C(22)   | 111.2(5) | Cl(3S)-C(1S)-H(1S1) | 109.6    |
| C(28)-C(27)-C(29)   | 109.9(5) | Cl(4S)-C(1S)-H(1S1) | 109.6    |
| C(22)-C(27)-C(29)   | 111.8(5) | Cl(3S)-C(1S)-H(1S2) | 109.6    |
| C(28)-C(27)-H(27A)  | 107.9    | Cl(4S)-C(1S)-H(1S2) | 109.6    |
| C(22)-C(27)-H(27A)  | 107.9    | H(1S1)-C(1S)-H(1S2) | 108.1    |
| C(29)-C(27)-H(27A)  | 107.9    | Cl(5S)-C(2S)-Cl(6S) | 113.8(4) |
| C(27)-C(28)-H(28A)  | 109.5    | Cl(5S)-C(2S)-H(2S1) | 108.8    |
| C(27)-C(28)-H(28B)  | 109.5    | Cl(6S)-C(2S)-H(2S1) | 108.8    |
| H(28A)-C(28)-H(28B) | 109.5    | Cl(5S)-C(2S)-H(2S2) | 108.8    |
| C(27)-C(28)-H(28C)  | 109.5    | Cl(6S)-C(2S)-H(2S2) | 108.8    |
| H(28A)-C(28)-H(28C) | 109.5    | H(2S1)-C(2S)-H(2S2) | 107.7    |
| H(28B)-C(28)-H(28C) | 109.5    |                     |          |
| C(27)-C(29)-H(29A)  | 109.5    |                     |          |
| C(27)-C(29)-H(29B)  | 109.5    |                     |          |
| H(29A)-C(29)-H(29B) | 109.5    |                     |          |
| C(27)-C(29)-H(29C)  | 109.5    |                     |          |
| H(29A)-C(29)-H(29C) | 109.5    |                     |          |
| H(29B)-C(29)-H(29C) | 109.5    |                     |          |
| C(26)-C(30)-C(31)   | 110.0(4) |                     |          |
| C(26)-C(30)-C(32)   | 112.1(4) |                     |          |
| C(31)-C(30)-C(32)   | 112.2(4) |                     |          |
| C(26)-C(30)-H(30A)  | 107.4    |                     |          |
| C(31)-C(30)-H(30A)  | 107.4    |                     |          |
| C(32)-C(30)-H(30A)  | 107.4    |                     |          |
| C(30)-C(31)-H(31A)  | 109.5    |                     |          |
| C(30)-C(31)-H(31B)  | 109.5    |                     |          |

**Table S12.** Anisotropic displacement parameters ( $\text{\AA}^2 \times 10^3$ ) for  $(\text{CDA}^{iPr})\text{FeCl}_2$  (**2a**) at 250 K. The anisotropic displacement factor exponent takes the form:  $-2p^2[h^2a^*2U^{11}+\dots+2hka^*b^*U^{12}]$ .

|        | $U^{11}$ | $U^{22}$ | $U^{33}$ | $U^{23}$ | $U^{13}$ | $U^{12}$ |
|--------|----------|----------|----------|----------|----------|----------|
| Fe(1)  | 55(1)    | 30(1)    | 42(1)    | -2(1)    | 1(1)     | -1(1)    |
| Cl(1)  | 56(1)    | 45(1)    | 89(1)    | 2(1)     | 8(1)     | -4(1)    |
| Cl(2)  | 118(1)   | 56(1)    | 38(1)    | -2(1)    | -15(1)   | -2(1)    |
| N(1)   | 64(2)    | 38(1)    | 34(1)    | -5(1)    | 0(1)     | -5(1)    |
| N(2)   | 52(2)    | 38(1)    | 30(1)    | 0(1)     | 0(1)     | -1(1)    |
| N(3)   | 65(2)    | 39(1)    | 37(1)    | -5(1)    | 0(1)     | 0(1)     |
| N(4)   | 46(2)    | 33(1)    | 34(1)    | 2(1)     | 1(1)     | -2(1)    |
| C(1)   | 54(2)    | 36(2)    | 35(2)    | -2(1)    | -1(1)    | -3(1)    |
| C(2)   | 72(2)    | 56(2)    | 32(2)    | -8(2)    | -4(2)    | -10(2)   |
| C(3)   | 59(2)    | 66(2)    | 31(2)    | 0(2)     | -3(2)    | -1(2)    |
| C(4)   | 62(2)    | 53(2)    | 30(2)    | 6(1)     | 2(1)     | 3(2)     |
| C(5)   | 45(2)    | 32(2)    | 37(2)    | 2(1)     | 4(1)     | 2(1)     |
| C(6)   | 80(3)    | 36(2)    | 46(2)    | 6(1)     | 2(2)     | -2(2)    |
| C(7)   | 50(2)    | 35(2)    | 37(2)    | -1(1)    | 1(1)     | -4(1)    |
| C(8)   | 57(2)    | 35(2)    | 40(2)    | 1(1)     | 4(2)     | -4(1)    |
| C(9)   | 66(2)    | 45(2)    | 51(2)    | -11(2)   | 5(2)     | -3(2)    |
| C(10)  | 70(3)    | 56(2)    | 60(2)    | -17(2)   | 0(2)     | -12(2)   |
| C(11)  | 55(2)    | 66(2)    | 61(2)    | -10(2)   | -4(2)    | -14(2)   |
| C(12)  | 52(2)    | 56(2)    | 44(2)    | -4(2)    | -1(2)    | -6(2)    |
| C(13)  | 50(2)    | 40(2)    | 43(2)    | -3(1)    | 4(2)     | 0(1)     |
| C(14)  | 61(2)    | 50(2)    | 67(2)    | 0(2)     | 0(2)     | 3(2)     |
| C(15)  | 64(3)    | 81(3)    | 56(2)    | 8(2)     | 10(2)    | -14(2)   |
| C(16)  | 52(2)    | 80(3)    | 65(2)    | -15(2)   | -3(2)    | -3(2)    |
| C(17)  | 75(3)    | 142(5)   | 82(3)    | -1(3)    | 21(3)    | 9(3)     |
| C(18)  | 62(3)    | 94(4)    | 104(4)   | -10(3)   | -18(3)   | 14(2)    |
| C(19)  | 65(2)    | 35(2)    | 41(2)    | -5(1)    | 3(2)     | -8(2)    |
| C(20)  | 111(4)   | 39(2)    | 67(3)    | -15(2)   | -12(2)   | -4(2)    |
| C(21)  | 74(3)    | 41(2)    | 43(2)    | -3(1)    | -4(2)    | 3(2)     |
| C(22)  | 74(3)    | 57(2)    | 64(2)    | -1(2)    | -5(2)    | 9(2)     |
| C(23)  | 83(3)    | 74(3)    | 84(3)    | -4(3)    | -16(3)   | 20(3)    |
| C(24)  | 107(4)   | 54(2)    | 62(3)    | 1(2)     | -15(3)   | 19(2)    |
| C(25)  | 95(3)    | 44(2)    | 53(2)    | 3(2)     | -1(2)    | 6(2)     |
| C(26)  | 80(3)    | 38(2)    | 47(2)    | -2(2)    | -1(2)    | 0(2)     |
| C(27)  | 71(3)    | 85(3)    | 113(4)   | 8(3)     | 14(3)    | 8(3)     |
| C(28)  | 99(5)    | 118(5)   | 152(6)   | -21(5)   | 12(4)    | -28(4)   |
| C(29)  | 116(5)   | 145(6)   | 112(5)   | -10(4)   | 36(4)    | -1(4)    |
| C(30)  | 77(3)    | 44(2)    | 65(2)    | 11(2)    | 14(2)    | 1(2)     |
| C(31)  | 113(4)   | 79(3)    | 91(4)    | 2(3)     | 32(3)    | 19(3)    |
| C(32)  | 85(3)    | 67(3)    | 112(4)   | 3(3)     | 3(3)     | -3(3)    |
| C(1S)  | 107(4)   | 61(3)    | 148(5)   | 2(3)     | -41(4)   | -11(3)   |
| Cl(3S) | 101(2)   | 218(5)   | 139(2)   | -30(3)   | 39(2)    | -45(2)   |
| Cl(4S) | 82(1)    | 94(2)    | 114(2)   | 9(1)     | 20(1)    | -2(1)    |
| C(2S)  | 128(5)   | 93(4)    | 76(3)    | -8(3)    | -12(3)   | -7(3)    |
| Cl(5S) | 96(2)    | 178(6)   | 116(2)   | 6(2)     | -11(1)   | -23(2)   |
| Cl(6S) | 159(4)   | 219(5)   | 116(2)   | -42(3)   | 47(3)    | -4(4)    |

## 11. Variable Temperature X-ray Crystallography Data for [(CDA<sup>iPr</sup>)FeCl<sub>2</sub>]BF<sub>4</sub> (3)

**Table S13.** Variable temperature X-ray data for [(CDA<sup>iPr</sup>)FeCl<sub>2</sub>]BF<sub>4</sub> (3).

|                                   | 80 K                                                                                                 | 150 K                                                                                                | 200 K                                                                                               | 298 K                                                                                                  |
|-----------------------------------|------------------------------------------------------------------------------------------------------|------------------------------------------------------------------------------------------------------|-----------------------------------------------------------------------------------------------------|--------------------------------------------------------------------------------------------------------|
| Identification code               | C32H46BCl2F4FeN4_80K                                                                                 | C32H46BCl2F4FeN4_150K                                                                                | C32H46BCl2F4FeN4_200K                                                                               | C32H46BCl2F4FeN4_298K                                                                                  |
| CCDC                              | 927790                                                                                               | 927792                                                                                               | 927793                                                                                              | 927794                                                                                                 |
| Empirical formula                 | C <sub>32</sub> H <sub>46</sub> BCl <sub>2</sub> F <sub>4</sub> FeN <sub>4</sub>                     | C <sub>32</sub> H <sub>46</sub> BCl <sub>2</sub> F <sub>4</sub> FeN <sub>4</sub>                     | C <sub>32</sub> H <sub>46</sub> BCl <sub>2</sub> F <sub>4</sub> FeN <sub>4</sub>                    | C <sub>32</sub> H <sub>46</sub> BCl <sub>2</sub> F <sub>4</sub> FeN <sub>4</sub>                       |
| Formula weight                    | 700.29                                                                                               | 700.29                                                                                               | 700.29                                                                                              | 700.29                                                                                                 |
| Temperature                       | 80(2) K                                                                                              | 150(2) K                                                                                             | 200(2) K                                                                                            | 298(2) K                                                                                               |
| Wavelength                        | 0.71073 Å                                                                                            | 1.54178 Å                                                                                            | 0.71073 Å                                                                                           | 1.54178 Å                                                                                              |
| Crystal system                    | Monoclinic                                                                                           | Monoclinic                                                                                           | Monoclinic                                                                                          | Monoclinic                                                                                             |
| Space group                       | P 2(1)/c                                                                                             | P 2(1)/c                                                                                             | P 2(1)/c                                                                                            | P 2(1)/c                                                                                               |
| Unit cell dimensions              | a = 18.6409(8) Å    α = 90°<br>b = 13.2744(6) Å    β =<br>115.405(2)°<br>c = 18.8709(8) Å    γ = 90° | a = 18.8421(7) Å    α = 90°<br>b = 13.3315(5) Å    β =<br>115.841(2)°<br>c = 18.9846(7) Å    γ = 90° | a = 19.0241(11) Å    α = 90°<br>b = 13.3780(9) Å    β = 116.142(3)°<br>c = 19.0251(12) Å    γ = 90° | a = 19.2475(3) Å    α = 90°<br>b = 13.5333(2) Å    β =<br>116.9130(10)°<br>c = 19.2087(2) Å    γ = 90° |
| Volume                            | 4218.0(3) Å <sup>3</sup>                                                                             | 4292.0(3) Å <sup>3</sup>                                                                             | 4346.7(5) Å <sup>3</sup>                                                                            | 4461.62(11) Å <sup>3</sup>                                                                             |
| Z                                 | 4                                                                                                    | 4                                                                                                    | 4                                                                                                   | 4                                                                                                      |
| Density (calculated)              | 1.103 Mg/m <sup>3</sup>                                                                              | 1.084 Mg/m <sup>3</sup>                                                                              | 1.070 Mg/m <sup>3</sup>                                                                             | 1.043 Mg/m <sup>3</sup>                                                                                |
| Absorption coefficient            | 0.525 mm <sup>-1</sup>                                                                               | 4.298 mm <sup>-1</sup>                                                                               | 0.509 mm <sup>-1</sup>                                                                              | 4.134 mm <sup>-1</sup>                                                                                 |
| F(000)                            | 1468                                                                                                 | 1468                                                                                                 | 1468                                                                                                | 1468                                                                                                   |
| Crystal size                      | 0.18 x 0.12 x 0.10 mm <sup>3</sup>                                                                   | 0.20 x 0.14 x 0.10 mm <sup>3</sup>                                                                   | 0.18 x 0.12 x 0.10 mm <sup>3</sup>                                                                  | 0.18 x 0.12 x 0.10 mm <sup>3</sup>                                                                     |
| Theta range for data collection   | 1.94 to 28.33°                                                                                       | 2.61 to 66.40°                                                                                       | 1.93 to 28.37°                                                                                      | 2.57 to 66.38°                                                                                         |
| Index ranges                      | -24 ≤ h ≤ 22, 0 ≤ k ≤ 17, 0 ≤ l ≤ 25                                                                 | -22 ≤ h ≤ 19, 0 ≤ k ≤ 15, 0 ≤ l ≤ 22                                                                 | -25 ≤ h ≤ 22, 0 ≤ k ≤ 17, 0 ≤ l ≤ 25                                                                | -22 ≤ h ≤ 20, 0 ≤ k ≤ 15, 0 ≤ l ≤ 22                                                                   |
| Reflections collected             | 10497                                                                                                | 7441                                                                                                 | 10806                                                                                               | 7616                                                                                                   |
| Independent reflections           | 10497 [R <sub>int</sub> = 0.0000]                                                                    | 7441 [R <sub>int</sub> = 0.0000]                                                                     | 10806 [R <sub>int</sub> = 0.0000]                                                                   | 7616 [R <sub>int</sub> = 0.0000]                                                                       |
| Completeness to θ = 32.15/66.36°  | 99.8 %                                                                                               | 98.3 %                                                                                               | 99.4 %                                                                                              | 97.1 %                                                                                                 |
| Max. and min. transmission        | 0.9494 and 0.9115                                                                                    | 0.6732 and 0.4803                                                                                    | 0.9508 and 0.9139                                                                                   | 0.6826 and 0.5232                                                                                      |
| Data / restraints / parameters    | 10497 / 1 / 418                                                                                      | 7441 / 1 / 418                                                                                       | 10806 / 1 / 418                                                                                     | 7616 / 41 / 425                                                                                        |
| Goodness-of-fit on F <sup>2</sup> | 1.014                                                                                                | 1.046                                                                                                | 0.940                                                                                               | 0.961                                                                                                  |
| Final R indices [I > 2σ(I)]       | R1 = 0.0450, ωR <sub>2</sub> = 0.1036                                                                | R1 = 0.0389, ωR <sub>2</sub> = 0.1027                                                                | R1 = 0.0523, ωR <sub>2</sub> = 0.1285                                                               | R1 = 0.0473, ωR <sub>2</sub> = 0.1236                                                                  |
| R indices (all data)              | R1 = 0.0771, ωR <sub>2</sub> = 0.1120                                                                | R1 = 0.0452, ωR <sub>2</sub> = 0.1062                                                                | R1 = 0.1027, ωR <sub>2</sub> = 0.1419                                                               | R1 = 0.0821, ωR <sub>2</sub> = 0.1352                                                                  |
| Largest diff. peak and hole       | 0.598 and -0.364 e.Å <sup>-3</sup>                                                                   | 0.525 and -0.236 e.Å <sup>-3</sup>                                                                   | 0.480 and -0.319 e.Å <sup>-3</sup>                                                                  | 0.238 and -0.260 e.Å <sup>-3</sup>                                                                     |

**Figure S12.** ORTEP plot of  $[(CDA^{iPr})FeCl_2]BF_4$  (**3**) at 80 K at 50% probability level. Hydrogen atoms, solvent molecules, and counterion were excluded for clarity.

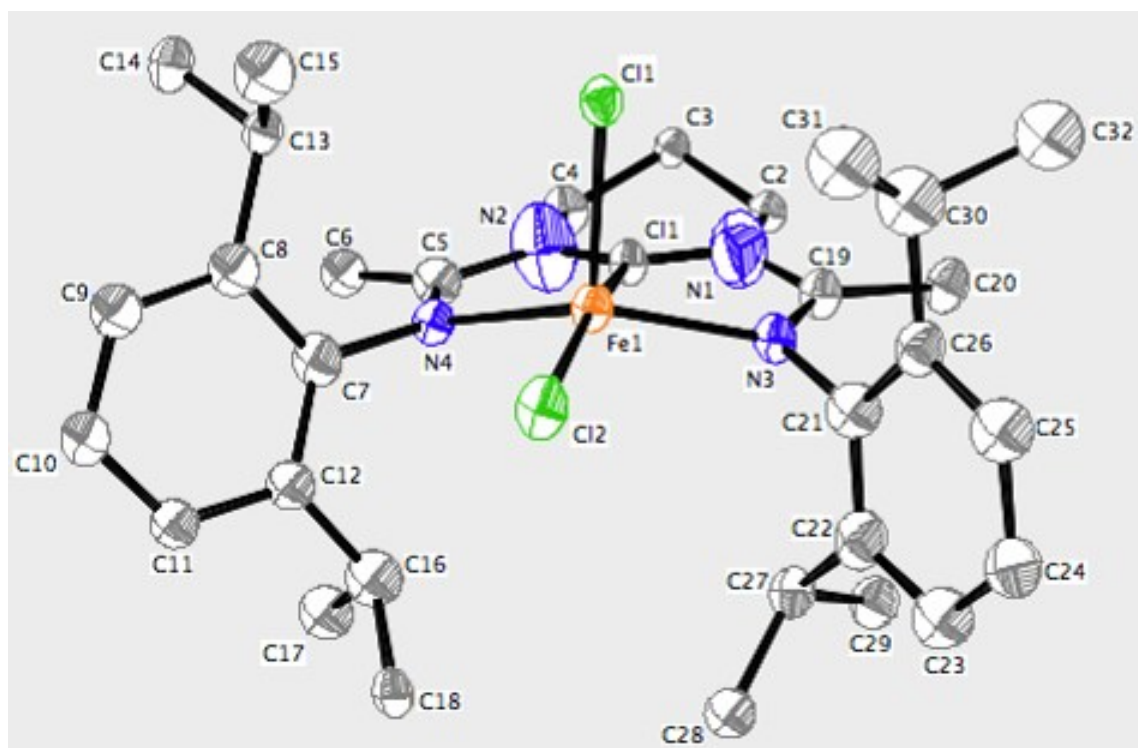

**Table S14.** Bond lengths (Å) and angles (°) for  $[(CDA^{iPr})FeCl_2]BF_4$  (**3**) at 80 K.

|              |            |              |          |                    |            |
|--------------|------------|--------------|----------|--------------------|------------|
| Fe(1)-C(1)   | 1.9081(19) | C(10)-H(10)  | 0.9500   | C(26)-C(30)        | 1.503(3)   |
| Fe(1)-N(3)   | 2.0242(15) | C(11)-C(12)  | 1.392(3) | C(27)-C(28)        | 1.512(3)   |
| Fe(1)-N(4)   | 2.0388(16) | C(11)-H(11)  | 0.9500   | C(27)-C(29)        | 1.519(3)   |
| Fe(1)-Cl(2)  | 2.168(4)   | C(12)-C(16)  | 1.514(3) | C(27)-H(27)        | 1.0000     |
| Fe(1)-Cl(2X) | 2.211(12)  | C(13)-C(15)  | 1.524(3) | C(28)-H(28A)       | 0.9800     |
| Fe(1)-Cl(1X) | 2.254(9)   | C(13)-C(14)  | 1.532(3) | C(28)-H(28B)       | 0.9800     |
| Fe(1)-Cl(1)  | 2.264(2)   | C(13)-H(13)  | 1.0000   | C(28)-H(28C)       | 0.9800     |
| N(1)-C(1)    | 1.341(2)   | C(14)-H(14A) | 0.9800   | C(29)-H(29A)       | 0.9800     |
| N(1)-C(19)   | 1.390(2)   | C(14)-H(14B) | 0.9800   | C(29)-H(29B)       | 0.9800     |
| N(1)-C(2)    | 1.482(2)   | C(14)-H(14C) | 0.9800   | C(29)-H(29C)       | 0.9800     |
| N(2)-C(1)    | 1.327(2)   | C(15)-H(15A) | 0.9800   | C(30)-C(31)        | 1.527(3)   |
| N(2)-C(5)    | 1.386(2)   | C(15)-H(15B) | 0.9800   | C(30)-C(32)        | 1.537(3)   |
| N(2)-C(4)    | 1.480(2)   | C(15)-H(15C) | 0.9800   | C(30)-H(30)        | 1.0000     |
| N(3)-C(19)   | 1.289(2)   | C(16)-C(17)  | 1.527(3) | C(31)-H(31A)       | 0.9800     |
| N(3)-C(21)   | 1.448(2)   | C(16)-C(18)  | 1.528(3) | C(31)-H(31B)       | 0.9800     |
| N(4)-C(5)    | 1.292(2)   | C(16)-H(16)  | 1.0000   | C(31)-H(31C)       | 0.9800     |
| N(4)-C(7)    | 1.450(2)   | C(17)-H(17A) | 0.9800   | C(32)-H(32A)       | 0.9800     |
| C(2)-C(3)    | 1.512(3)   | C(17)-H(17B) | 0.9800   | C(32)-H(32B)       | 0.9800     |
| C(2)-H(2A)   | 0.9900     | C(17)-H(17C) | 0.9800   | C(32)-H(32C)       | 0.9800     |
| C(2)-H(2B)   | 0.9900     | C(18)-H(18A) | 0.9800   | B(1)-F(3)          | 1.376(3)   |
| C(3)-C(4)    | 1.514(3)   | C(18)-H(18B) | 0.9800   | B(1)-F(1)          | 1.387(3)   |
| C(3)-H(3A)   | 0.9900     | C(18)-H(18C) | 0.9800   | B(1)-F(4)          | 1.396(3)   |
| C(3)-H(3B)   | 0.9900     | C(19)-C(20)  | 1.478(3) | B(1)-F(2)          | 1.399(3)   |
| C(4)-H(4A)   | 0.9900     | C(20)-H(20A) | 0.9800   | C(1)-Fe(1)-N(3)    | 76.69(7)   |
| C(4)-H(4B)   | 0.9900     | C(20)-H(20B) | 0.9800   | C(1)-Fe(1)-N(4)    | 76.40(7)   |
| C(5)-C(6)    | 1.480(3)   | C(20)-H(20C) | 0.9800   | N(3)-Fe(1)-N(4)    | 144.71(7)  |
| C(6)-H(6A)   | 0.9800     | C(21)-C(22)  | 1.400(3) | C(1)-Fe(1)-Cl(2)   | 167.61(10) |
| C(6)-H(6B)   | 0.9800     | C(21)-C(26)  | 1.404(3) | N(3)-Fe(1)-Cl(2)   | 101.98(11) |
| C(6)-H(6C)   | 0.9800     | C(22)-C(23)  | 1.394(3) | N(4)-Fe(1)-Cl(2)   | 99.46(12)  |
| C(7)-C(12)   | 1.403(3)   | C(22)-C(27)  | 1.519(3) | C(1)-Fe(1)-Cl(2X)  | 158.5(6)   |
| C(7)-C(8)    | 1.406(3)   | C(23)-C(24)  | 1.387(3) | N(3)-Fe(1)-Cl(2X)  | 101.2(3)   |
| C(8)-C(9)    | 1.391(3)   | C(23)-H(23)  | 0.9500   | N(4)-Fe(1)-Cl(2X)  | 95.6(4)    |
| C(8)-C(13)   | 1.519(3)   | C(24)-C(25)  | 1.382(3) | Cl(2)-Fe(1)-Cl(2X) | 9.2(6)     |
| C(9)-C(10)   | 1.378(3)   | C(24)-H(24)  | 0.9500   | C(1)-Fe(1)-Cl(1X)  | 94.8(6)    |
| C(9)-H(9)    | 0.9500     | C(25)-C(26)  | 1.396(3) | N(3)-Fe(1)-Cl(1X)  | 101.6(3)   |
| C(10)-C(11)  | 1.384(3)   | C(25)-H(25)  | 0.9500   | N(4)-Fe(1)-Cl(1X)  | 103.0(2)   |



|                     |            |                   |            |                     |            |
|---------------------|------------|-------------------|------------|---------------------|------------|
| Cl(2)-Fe(1)-Cl(1X)  | 97.5(6)    | C(3)-C(4)-H(4A)   | 110.0      | C(13)-C(14)-H(14A)  | 109.5      |
| Cl(2X)-Fe(1)-Cl(1X) | 106.5(3)   | N(2)-C(4)-H(4B)   | 110.0      | C(13)-C(14)-H(14B)  | 109.5      |
| C(1)-Fe(1)-Cl(1)    | 86.65(8)   | C(3)-C(4)-H(4B)   | 110.0      | H(14A)-C(14)-H(14B) | 109.5      |
| N(3)-Fe(1)-Cl(1)    | 97.62(8)   | H(4A)-C(4)-H(4B)  | 108.4      | C(13)-C(14)-H(14C)  | 109.5      |
| N(4)-Fe(1)-Cl(1)    | 103.15(8)  | N(4)-C(5)-N(2)    | 114.46(16) | H(14A)-C(14)-H(14C) | 109.5      |
| Cl(2)-Fe(1)-Cl(1)   | 105.70(9)  | N(4)-C(5)-C(6)    | 127.45(18) | H(14B)-C(14)-H(14C) | 109.5      |
| Cl(2X)-Fe(1)-Cl(1)  | 114.8(6)   | N(2)-C(5)-C(6)    | 118.08(16) | C(13)-C(15)-H(15A)  | 109.5      |
| Cl(1X)-Fe(1)-Cl(1)  | 8.4(6)     | C(5)-C(6)-H(6A)   | 109.5      | C(13)-C(15)-H(15B)  | 109.5      |
| C(1)-N(1)-C(19)     | 112.70(15) | C(5)-C(6)-H(6B)   | 109.5      | H(15A)-C(15)-H(15B) | 109.5      |
| C(1)-N(1)-C(2)      | 122.05(16) | H(6A)-C(6)-H(6B)  | 109.5      | C(13)-C(15)-H(15C)  | 109.5      |
| C(19)-N(1)-C(2)     | 124.39(16) | C(5)-C(6)-H(6C)   | 109.5      | H(15A)-C(15)-H(15C) | 109.5      |
| C(1)-N(2)-C(5)      | 113.12(15) | H(6A)-C(6)-H(6C)  | 109.5      | H(15B)-C(15)-H(15C) | 109.5      |
| C(1)-N(2)-C(4)      | 122.08(15) | H(6B)-C(6)-H(6C)  | 109.5      | C(12)-C(16)-C(17)   | 110.07(18) |
| C(5)-N(2)-C(4)      | 124.56(15) | C(12)-C(7)-C(8)   | 122.66(18) | C(12)-C(16)-C(18)   | 112.27(19) |
| C(19)-N(3)-C(21)    | 120.08(16) | C(12)-C(7)-N(4)   | 118.05(18) | C(17)-C(16)-C(18)   | 110.5(2)   |
| C(19)-N(3)-Fe(1)    | 115.67(13) | C(8)-C(7)-N(4)    | 119.23(18) | C(12)-C(16)-H(16)   | 107.9      |
| C(21)-N(3)-Fe(1)    | 124.26(12) | C(9)-C(8)-C(7)    | 117.06(19) | C(17)-C(16)-H(16)   | 107.9      |
| C(5)-N(4)-C(7)      | 119.98(16) | C(9)-C(8)-C(13)   | 119.26(19) | C(18)-C(16)-H(16)   | 107.9      |
| C(5)-N(4)-Fe(1)     | 115.48(13) | C(7)-C(8)-C(13)   | 123.67(18) | C(16)-C(17)-H(17A)  | 109.5      |
| C(7)-N(4)-Fe(1)     | 123.85(12) | C(10)-C(9)-C(8)   | 121.9(2)   | C(16)-C(17)-H(17B)  | 109.5      |
| N(2)-C(1)-N(1)      | 122.32(16) | C(10)-C(9)-H(9)   | 119.1      | H(17A)-C(17)-H(17B) | 109.5      |
| N(2)-C(1)-Fe(1)     | 119.39(13) | C(8)-C(9)-H(9)    | 119.1      | C(16)-C(17)-H(17C)  | 109.5      |
| N(1)-C(1)-Fe(1)     | 118.29(13) | C(9)-C(10)-C(11)  | 119.5(2)   | H(17A)-C(17)-H(17C) | 109.5      |
| N(1)-C(2)-C(3)      | 107.81(16) | C(9)-C(10)-H(10)  | 120.2      | H(17B)-C(17)-H(17C) | 109.5      |
| N(1)-C(2)-H(2A)     | 110.1      | C(11)-C(10)-H(10) | 120.2      | C(16)-C(18)-H(18A)  | 109.5      |
| C(3)-C(2)-H(2A)     | 110.1      | C(10)-C(11)-C(12) | 121.8(2)   | C(16)-C(18)-H(18B)  | 109.5      |
| N(1)-C(2)-H(2B)     | 110.1      | C(10)-C(11)-H(11) | 119.1      | H(18A)-C(18)-H(18B) | 109.5      |
| C(3)-C(2)-H(2B)     | 110.1      | C(12)-C(11)-H(11) | 119.1      | C(16)-C(18)-H(18C)  | 109.5      |
| H(2A)-C(2)-H(2B)    | 108.5      | C(11)-C(12)-C(7)  | 117.0(2)   | H(18A)-C(18)-H(18C) | 109.5      |
| C(2)-C(3)-C(4)      | 111.84(17) | C(11)-C(12)-C(16) | 119.0(2)   | H(18B)-C(18)-H(18C) | 109.5      |
| C(2)-C(3)-H(3A)     | 109.2      | C(7)-C(12)-C(16)  | 123.97(18) | N(3)-C(19)-N(1)     | 114.37(17) |
| C(4)-C(3)-H(3A)     | 109.2      | C(8)-C(13)-C(15)  | 109.80(18) | N(3)-C(19)-C(20)    | 127.25(18) |
| C(2)-C(3)-H(3B)     | 109.2      | C(8)-C(13)-C(14)  | 111.33(17) | N(1)-C(19)-C(20)    | 118.37(16) |
| C(4)-C(3)-H(3B)     | 109.2      | C(15)-C(13)-C(14) | 110.80(18) | C(19)-C(20)-H(20A)  | 109.5      |
| H(3A)-C(3)-H(3B)    | 107.9      | C(8)-C(13)-H(13)  | 108.3      | C(19)-C(20)-H(20B)  | 109.5      |
| N(2)-C(4)-C(3)      | 108.29(16) | C(15)-C(13)-H(13) | 108.3      | H(20A)-C(20)-H(20B) | 109.5      |
| N(2)-C(4)-H(4A)     | 110.0      | C(14)-C(13)-H(13) | 108.3      | C(19)-C(20)-H(20C)  | 109.5      |

|                     |            |                     |            |
|---------------------|------------|---------------------|------------|
| H(20A)-C(20)-H(20C) | 109.5      | H(29A)-C(29)-H(29C) | 109.5      |
| H(20B)-C(20)-H(20C) | 109.5      | H(29B)-C(29)-H(29C) | 109.5      |
| C(22)-C(21)-C(26)   | 123.40(18) | C(26)-C(30)-C(31)   | 111.15(18) |
| C(22)-C(21)-N(3)    | 116.61(18) | C(26)-C(30)-C(32)   | 110.99(18) |
| C(26)-C(21)-N(3)    | 119.96(18) | C(31)-C(30)-C(32)   | 110.78(19) |
| C(23)-C(22)-C(21)   | 117.45(19) | C(26)-C(30)-H(30)   | 107.9      |
| C(23)-C(22)-C(27)   | 120.82(19) | C(31)-C(30)-H(30)   | 107.9      |
| C(21)-C(22)-C(27)   | 121.68(18) | C(32)-C(30)-H(30)   | 107.9      |
| C(24)-C(23)-C(22)   | 120.5(2)   | C(30)-C(31)-H(31A)  | 109.5      |
| C(24)-C(23)-H(23)   | 119.8      | C(30)-C(31)-H(31B)  | 109.5      |
| C(22)-C(23)-H(23)   | 119.8      | H(31A)-C(31)-H(31B) | 109.5      |
| C(25)-C(24)-C(23)   | 120.6(2)   | C(30)-C(31)-H(31C)  | 109.5      |
| C(25)-C(24)-H(24)   | 119.7      | H(31A)-C(31)-H(31C) | 109.5      |
| C(23)-C(24)-H(24)   | 119.7      | H(31B)-C(31)-H(31C) | 109.5      |
| C(24)-C(25)-C(26)   | 121.4(2)   | C(30)-C(32)-H(32A)  | 109.5      |
| C(24)-C(25)-H(25)   | 119.3      | C(30)-C(32)-H(32B)  | 109.5      |
| C(26)-C(25)-H(25)   | 119.3      | H(32A)-C(32)-H(32B) | 109.5      |
| C(25)-C(26)-C(21)   | 116.5(2)   | C(30)-C(32)-H(32C)  | 109.5      |
| C(25)-C(26)-C(30)   | 120.56(19) | H(32A)-C(32)-H(32C) | 109.5      |
| C(21)-C(26)-C(30)   | 122.91(18) | H(32B)-C(32)-H(32C) | 109.5      |
| C(28)-C(27)-C(29)   | 111.78(18) | F(3)-B(1)-F(1)      | 110.0(2)   |
| C(28)-C(27)-C(22)   | 112.00(17) | F(3)-B(1)-F(4)      | 109.7(2)   |
| C(29)-C(27)-C(22)   | 110.85(17) | F(1)-B(1)-F(4)      | 109.27(19) |
| C(28)-C(27)-H(27)   | 107.3      | F(3)-B(1)-F(2)      | 110.24(19) |
| C(29)-C(27)-H(27)   | 107.3      | F(1)-B(1)-F(2)      | 109.32(19) |
| C(22)-C(27)-H(27)   | 107.3      | F(4)-B(1)-F(2)      | 108.21(19) |
| C(27)-C(28)-H(28A)  | 109.5      |                     |            |
| C(27)-C(28)-H(28B)  | 109.5      |                     |            |
| H(28A)-C(28)-H(28B) | 109.5      |                     |            |
| C(27)-C(28)-H(28C)  | 109.5      |                     |            |
| H(28A)-C(28)-H(28C) | 109.5      |                     |            |
| H(28B)-C(28)-H(28C) | 109.5      |                     |            |
| C(27)-C(29)-H(29A)  | 109.5      |                     |            |
| C(27)-C(29)-H(29B)  | 109.5      |                     |            |
| H(29A)-C(29)-H(29B) | 109.5      |                     |            |
| C(27)-C(29)-H(29C)  | 109.5      |                     |            |

**Table S15.** Anisotropic displacement parameters ( $\text{\AA}^2 \times 10^3$ ) for  $[(\text{CDA}^{\text{iPr}})\text{FeCl}_2]\text{BF}_4$  (**3**) at 80 K. The anisotropic displacement factor exponent takes the form:  $-2p^2[h^2a^*U^{11}+\dots+2hka^*b^*U^{12}]$ .

|        | $U^{11}$ | $U^{22}$ | $U^{33}$ | $U^{23}$ | $U^{13}$ | $U^{12}$ |
|--------|----------|----------|----------|----------|----------|----------|
| Fe(1)  | 19(1)    | 29(1)    | 14(1)    | 1(1)     | 8(1)     | 7(1)     |
| Cl(1)  | 21(1)    | 26(1)    | 24(1)    | -1(1)    | 10(1)    | 4(1)     |
| Cl(2)  | 27(1)    | 47(1)    | 12(1)    | 4(1)     | 8(1)     | 13(1)    |
| Cl(1X) | 42(3)    | 48(3)    | 153(7)   | -30(4)   | 38(5)    | -4(2)    |
| Cl(2X) | 83(6)    | 96(8)    | 23(3)    | 18(4)    | 29(4)    | 60(4)    |
| N(1)   | 21(1)    | 29(1)    | 12(1)    | 2(1)     | 6(1)     | 7(1)     |
| N(2)   | 20(1)    | 29(1)    | 10(1)    | -2(1)    | 7(1)     | 2(1)     |
| N(3)   | 21(1)    | 27(1)    | 13(1)    | 0(1)     | 7(1)     | 7(1)     |
| N(4)   | 20(1)    | 26(1)    | 14(1)    | 0(1)     | 7(1)     | 2(1)     |
| C(1)   | 18(1)    | 25(1)    | 15(1)    | 2(1)     | 8(1)     | 3(1)     |
| C(2)   | 31(1)    | 37(1)    | 12(1)    | 3(1)     | 6(1)     | 7(1)     |
| C(3)   | 30(1)    | 40(1)    | 15(1)    | 5(1)     | 10(1)    | 4(1)     |
| C(4)   | 27(1)    | 40(1)    | 10(1)    | -2(1)    | 10(1)    | 3(1)     |
| C(5)   | 18(1)    | 26(1)    | 17(1)    | -2(1)    | 8(1)     | 1(1)     |
| C(6)   | 26(1)    | 39(1)    | 22(1)    | -4(1)    | 11(1)    | 6(1)     |
| C(7)   | 24(1)    | 29(1)    | 15(1)    | 4(1)     | 8(1)     | 10(1)    |
| C(8)   | 24(1)    | 31(1)    | 18(1)    | -1(1)    | 10(1)    | 6(1)     |
| C(9)   | 20(1)    | 44(1)    | 24(1)    | 1(1)     | 7(1)     | 8(1)     |
| C(10)  | 28(1)    | 48(2)    | 29(1)    | 15(1)    | 11(1)    | 13(1)    |
| C(11)  | 30(1)    | 42(1)    | 31(1)    | 16(1)    | 13(1)    | 8(1)     |
| C(12)  | 24(1)    | 37(1)    | 25(1)    | 7(1)     | 12(1)    | 7(1)     |
| C(13)  | 22(1)    | 33(1)    | 24(1)    | -2(1)    | 8(1)     | 1(1)     |
| C(14)  | 27(1)    | 39(1)    | 36(1)    | 4(1)     | 14(1)    | 2(1)     |
| C(15)  | 34(1)    | 42(2)    | 28(1)    | -9(1)    | 4(1)     | 1(1)     |
| C(16)  | 23(1)    | 33(1)    | 33(1)    | 12(1)    | 8(1)     | 6(1)     |
| C(17)  | 32(1)    | 40(2)    | 49(2)    | 6(1)     | 12(1)    | 1(1)     |
| C(18)  | 28(1)    | 66(2)    | 45(2)    | 20(1)    | 17(1)    | 6(1)     |
| C(19)  | 21(1)    | 23(1)    | 19(1)    | -1(1)    | 7(1)     | 4(1)     |
| C(20)  | 25(1)    | 38(1)    | 18(1)    | 5(1)     | 5(1)     | 14(1)    |
| C(21)  | 18(1)    | 33(1)    | 12(1)    | 2(1)     | 4(1)     | 9(1)     |
| C(22)  | 24(1)    | 33(1)    | 17(1)    | 1(1)     | 8(1)     | 8(1)     |
| C(23)  | 27(1)    | 38(1)    | 18(1)    | 4(1)     | 9(1)     | 8(1)     |
| C(24)  | 29(1)    | 43(1)    | 17(1)    | 4(1)     | 11(1)    | 16(1)    |
| C(25)  | 25(1)    | 39(1)    | 15(1)    | -2(1)    | 3(1)     | 15(1)    |
| C(26)  | 20(1)    | 34(1)    | 15(1)    | 0(1)     | 3(1)     | 12(1)    |
| C(27)  | 28(1)    | 32(1)    | 24(1)    | -4(1)    | 15(1)    | 1(1)     |
| C(28)  | 26(1)    | 34(1)    | 24(1)    | -1(1)    | 5(1)     | 2(1)     |
| C(29)  | 50(2)    | 37(1)    | 22(1)    | 0(1)     | 10(1)    | 5(1)     |
| C(30)  | 28(1)    | 34(1)    | 24(1)    | -7(1)    | 9(1)     | 6(1)     |
| C(31)  | 29(1)    | 53(2)    | 38(1)    | -9(1)    | 5(1)     | 2(1)     |
| C(32)  | 39(1)    | 33(1)    | 39(1)    | -2(1)    | 13(1)    | 10(1)    |
| B(1)   | 28(1)    | 42(2)    | 20(1)    | 4(1)     | 8(1)     | 2(1)     |
| F(1)   | 47(1)    | 46(1)    | 29(1)    | -3(1)    | 13(1)    | -7(1)    |
| F(2)   | 43(1)    | 57(1)    | 47(1)    | 11(1)    | 28(1)    | 7(1)     |
| F(3)   | 38(1)    | 67(1)    | 27(1)    | 14(1)    | 17(1)    | 7(1)     |
| F(4)   | 50(1)    | 41(1)    | 40(1)    | -5(1)    | 24(1)    | 0(1)     |

**Figure S13.** ORTEP plot of  $[(\text{CDA}^{\text{Pr}})\text{FeCl}_2]\text{BF}_4$  (**3**) at 150 K at 50% probability level. Hydrogen atoms, solvent molecules, and counterion were excluded for clarity.

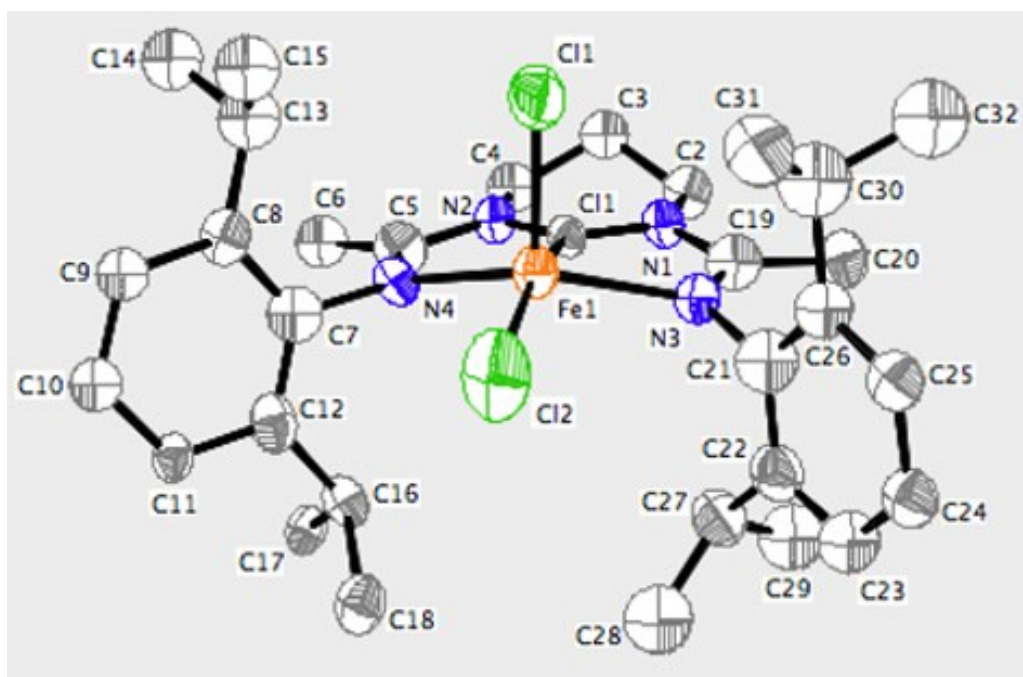

**Table S16.** Bond lengths (Å) and angles (°) for [(CDA<sup>Pr</sup>)FeCl<sub>2</sub>]BF<sub>4</sub> (**3**) at 150 K.

|              |            |              |          |                    |            |
|--------------|------------|--------------|----------|--------------------|------------|
| Fe(1)-C(1)   | 1.9488(18) | C(10)-H(10)  | 0.9500   | C(26)-C(30)        | 1.506(3)   |
| Fe(1)-N(3)   | 2.0586(15) | C(11)-C(12)  | 1.395(3) | C(27)-C(29)        | 1.506(3)   |
| Fe(1)-N(4)   | 2.0758(15) | C(11)-H(11)  | 0.9500   | C(27)-C(28)        | 1.514(3)   |
| Fe(1)-Cl(2)  | 2.149(2)   | C(12)-C(16)  | 1.516(3) | C(27)-H(27)        | 1.0000     |
| Fe(1)-Cl(1X) | 2.232(5)   | C(13)-C(15)  | 1.524(3) | C(28)-H(28A)       | 0.9800     |
| Fe(1)-Cl(1)  | 2.2516(14) | C(13)-C(14)  | 1.527(3) | C(28)-H(28B)       | 0.9800     |
| Fe(1)-Cl(2X) | 2.273(7)   | C(13)-H(13)  | 1.0000   | C(28)-H(28C)       | 0.9800     |
| N(1)-C(1)    | 1.336(2)   | C(14)-H(14A) | 0.9800   | C(29)-H(29A)       | 0.9800     |
| N(1)-C(19)   | 1.395(2)   | C(14)-H(14B) | 0.9800   | C(29)-H(29B)       | 0.9800     |
| N(1)-C(2)    | 1.486(2)   | C(14)-H(14C) | 0.9800   | C(29)-H(29C)       | 0.9800     |
| N(2)-C(1)    | 1.326(3)   | C(15)-H(15A) | 0.9800   | C(30)-C(31)        | 1.530(3)   |
| N(2)-C(5)    | 1.394(2)   | C(15)-H(15B) | 0.9800   | C(30)-C(32)        | 1.530(3)   |
| N(2)-C(4)    | 1.484(2)   | C(15)-H(15C) | 0.9800   | C(30)-H(30)        | 1.0000     |
| N(3)-C(19)   | 1.289(2)   | C(16)-C(17)  | 1.525(4) | C(31)-H(31A)       | 0.9800     |
| N(3)-C(21)   | 1.449(2)   | C(16)-C(18)  | 1.527(4) | C(31)-H(31B)       | 0.9800     |
| N(4)-C(5)    | 1.289(2)   | C(16)-H(16)  | 1.0000   | C(31)-H(31C)       | 0.9800     |
| N(4)-C(7)    | 1.448(2)   | C(17)-H(17A) | 0.9800   | C(32)-H(32A)       | 0.9800     |
| C(2)-C(3)    | 1.513(3)   | C(17)-H(17B) | 0.9800   | C(32)-H(32B)       | 0.9800     |
| C(2)-H(2A)   | 0.9900     | C(17)-H(17C) | 0.9800   | C(32)-H(32C)       | 0.9800     |
| C(2)-H(2B)   | 0.9900     | C(18)-H(18A) | 0.9800   | B(1)-F(1)          | 1.360(3)   |
| C(3)-C(4)    | 1.516(3)   | C(18)-H(18B) | 0.9800   | B(1)-F(3)          | 1.369(3)   |
| C(3)-H(3A)   | 0.9900     | C(18)-H(18C) | 0.9800   | B(1)-F(4)          | 1.390(4)   |
| C(3)-H(3B)   | 0.9900     | C(19)-C(20)  | 1.477(3) | B(1)-F(2)          | 1.403(3)   |
| C(4)-H(4A)   | 0.9900     | C(20)-H(20A) | 0.9800   | C(1)-Fe(1)-N(3)    | 75.80(7)   |
| C(4)-H(4B)   | 0.9900     | C(20)-H(20B) | 0.9800   | C(1)-Fe(1)-N(4)    | 75.53(7)   |
| C(5)-C(6)    | 1.482(3)   | C(20)-H(20C) | 0.9800   | N(3)-Fe(1)-N(4)    | 144.06(6)  |
| C(6)-H(6A)   | 0.9800     | C(21)-C(22)  | 1.398(3) | C(1)-Fe(1)-Cl(2)   | 164.3(2)   |
| C(6)-H(6B)   | 0.9800     | C(21)-C(26)  | 1.400(3) | N(3)-Fe(1)-Cl(2)   | 101.98(8)  |
| C(6)-H(6C)   | 0.9800     | C(22)-C(23)  | 1.397(3) | N(4)-Fe(1)-Cl(2)   | 99.80(8)   |
| C(7)-C(8)    | 1.400(3)   | C(22)-C(27)  | 1.519(3) | C(1)-Fe(1)-Cl(1X)  | 103.2(5)   |
| C(7)-C(12)   | 1.403(3)   | C(23)-C(24)  | 1.375(3) | N(3)-Fe(1)-Cl(1X)  | 103.6(2)   |
| C(8)-C(9)    | 1.391(3)   | C(23)-H(23)  | 0.9500   | N(4)-Fe(1)-Cl(1X)  | 103.65(13) |
| C(8)-C(13)   | 1.525(3)   | C(24)-C(25)  | 1.381(3) | Cl(2)-Fe(1)-Cl(1X) | 92.4(3)    |
| C(9)-C(10)   | 1.377(3)   | C(24)-H(24)  | 0.9500   | C(1)-Fe(1)-Cl(1)   | 87.90(18)  |
| C(9)-H(9)    | 0.9500     | C(25)-C(26)  | 1.399(3) | N(3)-Fe(1)-Cl(1)   | 98.00(9)   |
| C(10)-C(11)  | 1.375(3)   | C(25)-H(25)  | 0.9500   | N(4)-Fe(1)-Cl(1)   | 102.15(6)  |

|                     |            |                   |            |                     |            |
|---------------------|------------|-------------------|------------|---------------------|------------|
| Cl(2)-Fe(1)-Cl(1)   | 107.74(6)  | C(3)-C(4)-H(4A)   | 110.1      | C(13)-C(14)-H(14A)  | 109.5      |
| Cl(1X)-Fe(1)-Cl(1)  | 15.4(3)    | N(2)-C(4)-H(4B)   | 110.1      | C(13)-C(14)-H(14B)  | 109.5      |
| C(1)-Fe(1)-Cl(2X)   | 149.4(4)   | C(3)-C(4)-H(4B)   | 110.1      | H(14A)-C(14)-H(14B) | 109.5      |
| N(3)-Fe(1)-Cl(2X)   | 98.26(17)  | H(4A)-C(4)-H(4B)  | 108.4      | C(13)-C(14)-H(14C)  | 109.5      |
| N(4)-Fe(1)-Cl(2X)   | 95.5(2)    | N(4)-C(5)-N(2)    | 115.15(16) | H(14A)-C(14)-H(14C) | 109.5      |
| Cl(2)-Fe(1)-Cl(2X)  | 14.9(2)    | N(4)-C(5)-C(6)    | 127.04(18) | H(14B)-C(14)-H(14C) | 109.5      |
| Cl(1X)-Fe(1)-Cl(2X) | 107.33(18) | N(2)-C(5)-C(6)    | 117.81(16) | C(13)-C(15)-H(15A)  | 109.5      |
| Cl(1)-Fe(1)-Cl(2X)  | 122.7(3)   | C(5)-C(6)-H(6A)   | 109.5      | C(13)-C(15)-H(15B)  | 109.5      |
| C(1)-N(1)-C(19)     | 113.00(15) | C(5)-C(6)-H(6B)   | 109.5      | H(15A)-C(15)-H(15B) | 109.5      |
| C(1)-N(1)-C(2)      | 122.31(16) | H(6A)-C(6)-H(6B)  | 109.5      | C(13)-C(15)-H(15C)  | 109.5      |
| C(19)-N(1)-C(2)     | 123.94(15) | C(5)-C(6)-H(6C)   | 109.5      | H(15A)-C(15)-H(15C) | 109.5      |
| C(1)-N(2)-C(5)      | 113.29(15) | H(6A)-C(6)-H(6C)  | 109.5      | H(15B)-C(15)-H(15C) | 109.5      |
| C(1)-N(2)-C(4)      | 122.19(16) | H(6B)-C(6)-H(6C)  | 109.5      | C(12)-C(16)-C(17)   | 110.1(2)   |
| C(5)-N(2)-C(4)      | 124.25(15) | C(8)-C(7)-C(12)   | 122.28(18) | C(12)-C(16)-C(18)   | 112.1(2)   |
| C(19)-N(3)-C(21)    | 120.20(16) | C(8)-C(7)-N(4)    | 119.09(18) | C(17)-C(16)-C(18)   | 110.6(2)   |
| C(19)-N(3)-Fe(1)    | 115.62(13) | C(12)-C(7)-N(4)   | 118.57(18) | C(12)-C(16)-H(16)   | 108.0      |
| C(21)-N(3)-Fe(1)    | 124.15(11) | C(9)-C(8)-C(7)    | 117.4(2)   | C(17)-C(16)-H(16)   | 108.0      |
| C(5)-N(4)-C(7)      | 120.38(16) | C(9)-C(8)-C(13)   | 118.98(19) | C(18)-C(16)-H(16)   | 108.0      |
| C(5)-N(4)-Fe(1)     | 115.43(13) | C(7)-C(8)-C(13)   | 123.62(18) | C(16)-C(17)-H(17A)  | 109.5      |
| C(7)-N(4)-Fe(1)     | 123.80(12) | C(10)-C(9)-C(8)   | 121.7(2)   | C(16)-C(17)-H(17B)  | 109.5      |
| N(2)-C(1)-N(1)      | 122.33(16) | C(10)-C(9)-H(9)   | 119.1      | H(17A)-C(17)-H(17B) | 109.5      |
| N(2)-C(1)-Fe(1)     | 119.29(13) | C(8)-C(9)-H(9)    | 119.1      | C(16)-C(17)-H(17C)  | 109.5      |
| N(1)-C(1)-Fe(1)     | 118.33(13) | C(11)-C(10)-C(9)  | 119.7(2)   | H(17A)-C(17)-H(17C) | 109.5      |
| N(1)-C(2)-C(3)      | 107.53(16) | C(11)-C(10)-H(10) | 120.1      | H(17B)-C(17)-H(17C) | 109.5      |
| N(1)-C(2)-H(2A)     | 110.2      | C(9)-C(10)-H(10)  | 120.1      | C(16)-C(18)-H(18A)  | 109.5      |
| C(3)-C(2)-H(2A)     | 110.2      | C(10)-C(11)-C(12) | 121.7(2)   | C(16)-C(18)-H(18B)  | 109.5      |
| N(1)-C(2)-H(2B)     | 110.2      | C(10)-C(11)-H(11) | 119.2      | H(18A)-C(18)-H(18B) | 109.5      |
| C(3)-C(2)-H(2B)     | 110.2      | C(12)-C(11)-H(11) | 119.2      | C(16)-C(18)-H(18C)  | 109.5      |
| H(2A)-C(2)-H(2B)    | 108.5      | C(11)-C(12)-C(7)  | 117.2(2)   | H(18A)-C(18)-H(18C) | 109.5      |
| C(2)-C(3)-C(4)      | 111.95(18) | C(11)-C(12)-C(16) | 119.1(2)   | H(18B)-C(18)-H(18C) | 109.5      |
| C(2)-C(3)-H(3A)     | 109.2      | C(7)-C(12)-C(16)  | 123.65(18) | N(3)-C(19)-N(1)     | 114.98(16) |
| C(4)-C(3)-H(3A)     | 109.2      | C(15)-C(13)-C(8)  | 110.0(2)   | N(3)-C(19)-C(20)    | 126.90(18) |
| C(2)-C(3)-H(3B)     | 109.2      | C(15)-C(13)-C(14) | 110.8(2)   | N(1)-C(19)-C(20)    | 118.12(16) |
| C(4)-C(3)-H(3B)     | 109.2      | C(8)-C(13)-C(14)  | 111.29(18) | C(19)-C(20)-H(20A)  | 109.5      |
| H(3A)-C(3)-H(3B)    | 107.9      | C(15)-C(13)-H(13) | 108.2      | C(19)-C(20)-H(20B)  | 109.5      |
| N(2)-C(4)-C(3)      | 108.11(16) | C(8)-C(13)-H(13)  | 108.2      | H(20A)-C(20)-H(20B) | 109.5      |
| N(2)-C(4)-H(4A)     | 110.1      | C(14)-C(13)-H(13) | 108.2      | C(19)-C(20)-H(20C)  | 109.5      |

|                     |            |                     |            |
|---------------------|------------|---------------------|------------|
| H(20A)-C(20)-H(20C) | 109.5      | H(29B)-C(29)-H(29C) | 109.5      |
| H(20B)-C(20)-H(20C) | 109.5      | C(26)-C(30)-C(31)   | 110.7(2)   |
| C(22)-C(21)-C(26)   | 123.27(18) | C(26)-C(30)-C(32)   | 111.66(19) |
| C(22)-C(21)-N(3)    | 116.64(17) | C(31)-C(30)-C(32)   | 110.3(2)   |
| C(26)-C(21)-N(3)    | 120.05(18) | C(26)-C(30)-H(30)   | 108.0      |
| C(23)-C(22)-C(21)   | 117.3(2)   | C(31)-C(30)-H(30)   | 108.0      |
| C(23)-C(22)-C(27)   | 120.6(2)   | C(32)-C(30)-H(30)   | 108.0      |
| C(21)-C(22)-C(27)   | 122.11(18) | C(30)-C(31)-H(31A)  | 109.5      |
| C(24)-C(23)-C(22)   | 121.0(2)   | C(30)-C(31)-H(31B)  | 109.5      |
| C(24)-C(23)-H(23)   | 119.5      | H(31A)-C(31)-H(31B) | 109.5      |
| C(22)-C(23)-H(23)   | 119.5      | C(30)-C(31)-H(31C)  | 109.5      |
| C(23)-C(24)-C(25)   | 120.4(2)   | H(31A)-C(31)-H(31C) | 109.5      |
| C(23)-C(24)-H(24)   | 119.8      | H(31B)-C(31)-H(31C) | 109.5      |
| C(25)-C(24)-H(24)   | 119.8      | C(30)-C(32)-H(32A)  | 109.5      |
| C(24)-C(25)-C(26)   | 121.4(2)   | C(30)-C(32)-H(32B)  | 109.5      |
| C(24)-C(25)-H(25)   | 119.3      | H(32A)-C(32)-H(32B) | 109.5      |
| C(26)-C(25)-H(25)   | 119.3      | C(30)-C(32)-H(32C)  | 109.5      |
| C(25)-C(26)-C(21)   | 116.6(2)   | H(32A)-C(32)-H(32C) | 109.5      |
| C(25)-C(26)-C(30)   | 120.56(19) | H(32B)-C(32)-H(32C) | 109.5      |
| C(21)-C(26)-C(30)   | 122.87(18) | F(1)-B(1)-F(3)      | 110.7(2)   |
| C(29)-C(27)-C(28)   | 111.2(2)   | F(1)-B(1)-F(4)      | 109.4(2)   |
| C(29)-C(27)-C(22)   | 111.07(19) | F(3)-B(1)-F(4)      | 110.3(2)   |
| C(28)-C(27)-C(22)   | 112.39(18) | F(1)-B(1)-F(2)      | 109.0(2)   |
| C(29)-C(27)-H(27)   | 107.3      | F(3)-B(1)-F(2)      | 110.3(2)   |
| C(28)-C(27)-H(27)   | 107.3      | F(4)-B(1)-F(2)      | 107.0(2)   |
| C(22)-C(27)-H(27)   | 107.3      |                     |            |
| C(27)-C(28)-H(28A)  | 109.5      |                     |            |
| C(27)-C(28)-H(28B)  | 109.5      |                     |            |
| H(28A)-C(28)-H(28B) | 109.5      |                     |            |
| C(27)-C(28)-H(28C)  | 109.5      |                     |            |
| H(28A)-C(28)-H(28C) | 109.5      |                     |            |
| H(28B)-C(28)-H(28C) | 109.5      |                     |            |
| C(27)-C(29)-H(29A)  | 109.5      |                     |            |
| C(27)-C(29)-H(29B)  | 109.5      |                     |            |
| H(29A)-C(29)-H(29B) | 109.5      |                     |            |
| C(27)-C(29)-H(29C)  | 109.5      |                     |            |
| H(29A)-C(29)-H(29C) | 109.5      |                     |            |

**Table S17.** Anisotropic displacement parameters ( $\text{\AA}^2 \times 10^3$ ) for  $[(\text{CDA}^{\text{Pr}})\text{FeCl}_2]\text{BF}_4$  (**3**) at 150 K. The anisotropic displacement factor exponent takes the form:  $-2p^2[h^2a^*2U^{11}+\dots+2hka^*b^*U^{12}]$ .

|        | $U^{11}$ | $U^{22}$ | $U^{33}$ | $U^{23}$ | $U^{13}$ | $U^{12}$ |
|--------|----------|----------|----------|----------|----------|----------|
| Fe(1)  | 30(1)    | 40(1)    | 23(1)    | 1(1)     | 11(1)    | 8(1)     |
| Cl(1)  | 39(1)    | 42(1)    | 58(2)    | -4(1)    | 21(1)    | 1(1)     |
| Cl(2)  | 52(1)    | 81(2)    | 21(1)    | 8(1)     | 16(1)    | 25(1)    |
| Cl(1X) | 31(2)    | 51(2)    | 47(5)    | -16(2)   | 7(2)     | -1(1)    |
| Cl(2X) | 39(3)    | 64(4)    | 24(2)    | 8(2)     | 16(2)    | 14(2)    |
| N(1)   | 32(1)    | 40(1)    | 20(1)    | 2(1)     | 8(1)     | 6(1)     |
| N(2)   | 31(1)    | 39(1)    | 19(1)    | -2(1)    | 10(1)    | 3(1)     |
| N(3)   | 28(1)    | 39(1)    | 21(1)    | -2(1)    | 8(1)     | 5(1)     |
| N(4)   | 32(1)    | 34(1)    | 24(1)    | 0(1)     | 10(1)    | 4(1)     |
| C(1)   | 30(1)    | 38(1)    | 20(1)    | 1(1)     | 9(1)     | 4(1)     |
| C(2)   | 42(1)    | 54(1)    | 20(1)    | 6(1)     | 8(1)     | 9(1)     |
| C(3)   | 47(1)    | 59(1)    | 22(1)    | 6(1)     | 15(1)    | 5(1)     |
| C(4)   | 39(1)    | 56(1)    | 20(1)    | -2(1)    | 14(1)    | 3(1)     |
| C(5)   | 30(1)    | 35(1)    | 27(1)    | -2(1)    | 12(1)    | 1(1)     |
| C(6)   | 41(1)    | 52(1)    | 34(1)    | -4(1)    | 17(1)    | 11(1)    |
| C(7)   | 36(1)    | 42(1)    | 22(1)    | 2(1)     | 11(1)    | 9(1)     |
| C(8)   | 37(1)    | 46(1)    | 28(1)    | -2(1)    | 14(1)    | 6(1)     |
| C(9)   | 35(1)    | 60(2)    | 35(1)    | 2(1)     | 10(1)    | 8(1)     |
| C(10)  | 40(1)    | 68(2)    | 43(1)    | 18(1)    | 12(1)    | 14(1)    |
| C(11)  | 46(1)    | 59(2)    | 46(1)    | 22(1)    | 18(1)    | 11(1)    |
| C(12)  | 40(1)    | 50(1)    | 35(1)    | 11(1)    | 16(1)    | 9(1)     |
| C(13)  | 38(1)    | 45(1)    | 40(1)    | -2(1)    | 12(1)    | 3(1)     |
| C(14)  | 47(1)    | 58(2)    | 56(1)    | 6(1)     | 25(1)    | 2(1)     |
| C(15)  | 59(2)    | 57(2)    | 56(2)    | -13(1)   | 12(1)    | -4(1)    |
| C(16)  | 40(1)    | 47(1)    | 51(1)    | 17(1)    | 13(1)    | 6(1)     |
| C(17)  | 55(2)    | 58(2)    | 79(2)    | 6(1)     | 17(1)    | 1(1)     |
| C(18)  | 48(1)    | 82(2)    | 78(2)    | 31(2)    | 29(1)    | 6(1)     |
| C(19)  | 31(1)    | 35(1)    | 23(1)    | 0(1)     | 8(1)     | 3(1)     |
| C(20)  | 39(1)    | 56(1)    | 32(1)    | 9(1)     | 11(1)    | 19(1)    |
| C(21)  | 29(1)    | 43(1)    | 21(1)    | 0(1)     | 8(1)     | 10(1)    |
| C(22)  | 34(1)    | 47(1)    | 28(1)    | -2(1)    | 13(1)    | 4(1)     |
| C(23)  | 40(1)    | 56(1)    | 31(1)    | 5(1)     | 16(1)    | 8(1)     |
| C(24)  | 43(1)    | 60(1)    | 26(1)    | 6(1)     | 16(1)    | 18(1)    |
| C(25)  | 39(1)    | 52(1)    | 24(1)    | -2(1)    | 6(1)     | 18(1)    |
| C(26)  | 30(1)    | 46(1)    | 20(1)    | -1(1)    | 3(1)     | 10(1)    |
| C(27)  | 45(1)    | 48(1)    | 41(1)    | -5(1)    | 23(1)    | -1(1)    |
| C(28)  | 44(1)    | 48(1)    | 43(1)    | -2(1)    | 8(1)     | 3(1)     |
| C(29)  | 78(2)    | 52(2)    | 34(1)    | -1(1)    | 6(1)     | 2(1)     |
| C(30)  | 40(1)    | 46(1)    | 36(1)    | -8(1)    | 10(1)    | 5(1)     |
| C(31)  | 47(1)    | 78(2)    | 54(2)    | -15(1)   | 2(1)     | -9(1)    |
| C(32)  | 61(2)    | 46(1)    | 67(2)    | -1(1)    | 22(1)    | 3(1)     |
| B(1)   | 54(2)    | 67(2)    | 32(1)    | 5(1)     | 20(1)    | 4(1)     |
| F(1)   | 83(1)    | 86(1)    | 42(1)    | -3(1)    | 14(1)    | -21(1)   |
| F(2)   | 67(1)    | 104(1)   | 80(1)    | 26(1)    | 45(1)    | 13(1)    |
| F(3)   | 65(1)    | 124(2)   | 44(1)    | 28(1)    | 29(1)    | 13(1)    |
| F(4)   | 96(1)    | 68(1)    | 76(1)    | -11(1)   | 46(1)    | -9(1)    |



**Figure S14.** ORTEP plot of  $[(\text{CDA}^{\text{Pr}})\text{FeCl}_2]\text{BF}_4$  (**3**) at 200 K at 50% probability level. Hydrogen atoms, solvent molecules, and counterion were excluded for clarity.

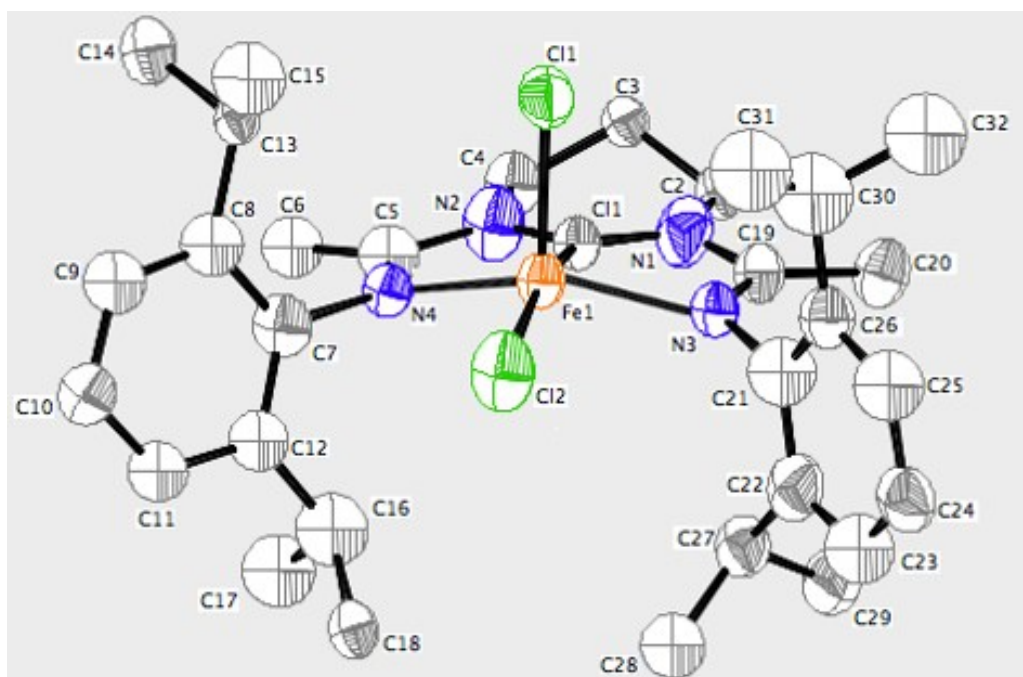

**Table S18.** Bond lengths (Å) and angles (°) for [(CDA<sup>Pr</sup>)FeCl<sub>2</sub>]BF<sub>4</sub> (**3**) at 200 K.

|              |            |              |          |                    |            |
|--------------|------------|--------------|----------|--------------------|------------|
| Fe(1)-C(1)   | 1.984(2)   | C(10)-H(10)  | 0.9500   | C(26)-C(30)        | 1.496(4)   |
| Fe(1)-N(3)   | 2.0974(18) | C(11)-C(12)  | 1.401(4) | C(27)-C(29)        | 1.512(4)   |
| Fe(1)-N(4)   | 2.1096(18) | C(11)-H(11)  | 0.9500   | C(27)-C(28)        | 1.513(4)   |
| Fe(1)-Cl(2)  | 2.113(8)   | C(12)-C(16)  | 1.507(4) | C(27)-H(27)        | 1.0000     |
| Fe(1)-Cl(1X) | 2.218(7)   | C(13)-C(14)  | 1.523(4) | C(28)-H(28A)       | 0.9800     |
| Fe(1)-Cl(2X) | 2.227(8)   | C(13)-C(15)  | 1.531(4) | C(28)-H(28B)       | 0.9800     |
| Fe(1)-Cl(1)  | 2.234(6)   | C(13)-H(13)  | 1.0000   | C(28)-H(28C)       | 0.9800     |
| N(1)-C(1)    | 1.336(3)   | C(14)-H(14A) | 0.9800   | C(29)-H(29A)       | 0.9800     |
| N(1)-C(19)   | 1.392(3)   | C(14)-H(14B) | 0.9800   | C(29)-H(29B)       | 0.9800     |
| N(1)-C(2)    | 1.484(3)   | C(14)-H(14C) | 0.9800   | C(29)-H(29C)       | 0.9800     |
| N(2)-C(1)    | 1.327(3)   | C(15)-H(15A) | 0.9800   | C(30)-C(31)        | 1.519(4)   |
| N(2)-C(5)    | 1.396(3)   | C(15)-H(15B) | 0.9800   | C(30)-C(32)        | 1.530(4)   |
| N(2)-C(4)    | 1.478(3)   | C(15)-H(15C) | 0.9800   | C(30)-H(30)        | 1.0000     |
| N(3)-C(19)   | 1.286(3)   | C(16)-C(17)  | 1.533(4) | C(31)-H(31A)       | 0.9800     |
| N(3)-C(21)   | 1.442(3)   | C(16)-C(18)  | 1.541(4) | C(31)-H(31B)       | 0.9800     |
| N(4)-C(5)    | 1.287(3)   | C(16)-H(16)  | 1.0000   | C(31)-H(31C)       | 0.9800     |
| N(4)-C(7)    | 1.453(3)   | C(17)-H(17A) | 0.9800   | C(32)-H(32A)       | 0.9800     |
| C(2)-C(3)    | 1.503(3)   | C(17)-H(17B) | 0.9800   | C(32)-H(32B)       | 0.9800     |
| C(2)-H(2A)   | 0.9900     | C(17)-H(17C) | 0.9800   | C(32)-H(32C)       | 0.9800     |
| C(2)-H(2B)   | 0.9900     | C(18)-H(18A) | 0.9800   | B(1)-F(1)          | 1.337(4)   |
| C(3)-C(4)    | 1.519(4)   | C(18)-H(18B) | 0.9800   | B(1)-F(3)          | 1.360(4)   |
| C(3)-H(3A)   | 0.9900     | C(18)-H(18C) | 0.9800   | B(1)-F(4)          | 1.378(5)   |
| C(3)-H(3B)   | 0.9900     | C(19)-C(20)  | 1.488(3) | B(1)-F(2)          | 1.381(4)   |
| C(4)-H(4A)   | 0.9900     | C(20)-H(20A) | 0.9800   | C(1)-Fe(1)-N(3)    | 74.80(8)   |
| C(4)-H(4B)   | 0.9900     | C(20)-H(20B) | 0.9800   | C(1)-Fe(1)-N(4)    | 74.45(8)   |
| C(5)-C(6)    | 1.477(3)   | C(20)-H(20C) | 0.9800   | N(3)-Fe(1)-N(4)    | 143.07(7)  |
| C(6)-H(6A)   | 0.9800     | C(21)-C(26)  | 1.395(3) | C(1)-Fe(1)-Cl(2)   | 162.0(5)   |
| C(6)-H(6B)   | 0.9800     | C(21)-C(22)  | 1.397(4) | N(3)-Fe(1)-Cl(2)   | 102.0(3)   |
| C(6)-H(6C)   | 0.9800     | C(22)-C(23)  | 1.389(3) | N(4)-Fe(1)-Cl(2)   | 100.9(3)   |
| C(7)-C(8)    | 1.393(3)   | C(22)-C(27)  | 1.527(4) | C(1)-Fe(1)-Cl(1X)  | 101.7(5)   |
| C(7)-C(12)   | 1.403(4)   | C(23)-C(24)  | 1.379(4) | N(3)-Fe(1)-Cl(1X)  | 102.5(2)   |
| C(8)-C(9)    | 1.389(4)   | C(23)-H(23)  | 0.9500   | N(4)-Fe(1)-Cl(1X)  | 103.35(18) |
| C(8)-C(13)   | 1.520(4)   | C(24)-C(25)  | 1.373(4) | Cl(2)-Fe(1)-Cl(1X) | 96.27(16)  |
| C(9)-C(10)   | 1.377(4)   | C(24)-H(24)  | 0.9500   | C(1)-Fe(1)-Cl(2X)  | 148.6(4)   |
| C(9)-H(9)    | 0.9500     | C(25)-C(26)  | 1.406(4) | N(3)-Fe(1)-Cl(2X)  | 99.0(2)    |
| C(10)-C(11)  | 1.359(4)   | C(25)-H(25)  | 0.9500   | N(4)-Fe(1)-Cl(2X)  | 96.7(3)    |

|                     |            |                   |            |                     |            |
|---------------------|------------|-------------------|------------|---------------------|------------|
| Cl(2)-Fe(1)-Cl(2X)  | 13.4(2)    | C(3)-C(4)-H(4A)   | 110.1      | C(13)-C(14)-H(14A)  | 109.5      |
| Cl(1X)-Fe(1)-Cl(2X) | 109.64(18) | N(2)-C(4)-H(4B)   | 110.1      | C(13)-C(14)-H(14B)  | 109.5      |
| C(1)-Fe(1)-Cl(1)    | 88.5(4)    | C(3)-C(4)-H(4B)   | 110.1      | H(14A)-C(14)-H(14B) | 109.5      |
| N(3)-Fe(1)-Cl(1)    | 98.1(2)    | H(4A)-C(4)-H(4B)  | 108.4      | C(13)-C(14)-H(14C)  | 109.5      |
| N(4)-Fe(1)-Cl(1)    | 101.08(19) | N(4)-C(5)-N(2)    | 115.54(19) | H(14A)-C(14)-H(14C) | 109.5      |
| Cl(2)-Fe(1)-Cl(1)   | 109.45(18) | N(4)-C(5)-C(6)    | 126.8(2)   | H(14B)-C(14)-H(14C) | 109.5      |
| Cl(1X)-Fe(1)-Cl(1)  | 13.22(17)  | N(2)-C(5)-C(6)    | 117.6(2)   | C(13)-C(15)-H(15A)  | 109.5      |
| Cl(2X)-Fe(1)-Cl(1)  | 122.83(16) | C(5)-C(6)-H(6A)   | 109.5      | C(13)-C(15)-H(15B)  | 109.5      |
| C(1)-N(1)-C(19)     | 113.29(18) | C(5)-C(6)-H(6B)   | 109.5      | H(15A)-C(15)-H(15B) | 109.5      |
| C(1)-N(1)-C(2)      | 122.45(19) | H(6A)-C(6)-H(6B)  | 109.5      | C(13)-C(15)-H(15C)  | 109.5      |
| C(19)-N(1)-C(2)     | 123.78(18) | C(5)-C(6)-H(6C)   | 109.5      | H(15A)-C(15)-H(15C) | 109.5      |
| C(1)-N(2)-C(5)      | 113.31(18) | H(6A)-C(6)-H(6C)  | 109.5      | H(15B)-C(15)-H(15C) | 109.5      |
| C(1)-N(2)-C(4)      | 122.42(18) | H(6B)-C(6)-H(6C)  | 109.5      | C(12)-C(16)-C(17)   | 110.7(2)   |
| C(5)-N(2)-C(4)      | 123.91(18) | C(8)-C(7)-C(12)   | 122.6(2)   | C(12)-C(16)-C(18)   | 111.4(3)   |
| C(19)-N(3)-C(21)    | 120.03(19) | C(8)-C(7)-N(4)    | 119.2(2)   | C(17)-C(16)-C(18)   | 109.9(3)   |
| C(19)-N(3)-Fe(1)    | 115.55(15) | C(12)-C(7)-N(4)   | 118.1(2)   | C(12)-C(16)-H(16)   | 108.2      |
| C(21)-N(3)-Fe(1)    | 124.30(14) | C(9)-C(8)-C(7)    | 117.2(2)   | C(17)-C(16)-H(16)   | 108.2      |
| C(5)-N(4)-C(7)      | 120.17(19) | C(9)-C(8)-C(13)   | 119.1(2)   | C(18)-C(16)-H(16)   | 108.2      |
| C(5)-N(4)-Fe(1)     | 115.68(15) | C(7)-C(8)-C(13)   | 123.6(2)   | C(16)-C(17)-H(17A)  | 109.5      |
| C(7)-N(4)-Fe(1)     | 123.97(14) | C(10)-C(9)-C(8)   | 121.9(3)   | C(16)-C(17)-H(17B)  | 109.5      |
| N(2)-C(1)-N(1)      | 121.95(19) | C(10)-C(9)-H(9)   | 119.1      | H(17A)-C(17)-H(17B) | 109.5      |
| N(2)-C(1)-Fe(1)     | 119.40(15) | C(8)-C(9)-H(9)    | 119.1      | C(16)-C(17)-H(17C)  | 109.5      |
| N(1)-C(1)-Fe(1)     | 118.49(16) | C(11)-C(10)-C(9)  | 119.5(3)   | H(17A)-C(17)-H(17C) | 109.5      |
| N(1)-C(2)-C(3)      | 107.79(19) | C(11)-C(10)-H(10) | 120.2      | H(17B)-C(17)-H(17C) | 109.5      |
| N(1)-C(2)-H(2A)     | 110.1      | C(9)-C(10)-H(10)  | 120.2      | C(16)-C(18)-H(18A)  | 109.5      |
| C(3)-C(2)-H(2A)     | 110.1      | C(10)-C(11)-C(12) | 122.3(3)   | C(16)-C(18)-H(18B)  | 109.5      |
| N(1)-C(2)-H(2B)     | 110.1      | C(10)-C(11)-H(11) | 118.9      | H(18A)-C(18)-H(18B) | 109.5      |
| C(3)-C(2)-H(2B)     | 110.1      | C(12)-C(11)-H(11) | 118.9      | C(16)-C(18)-H(18C)  | 109.5      |
| H(2A)-C(2)-H(2B)    | 108.5      | C(11)-C(12)-C(7)  | 116.5(2)   | H(18A)-C(18)-H(18C) | 109.5      |
| C(2)-C(3)-C(4)      | 112.0(2)   | C(11)-C(12)-C(16) | 119.8(3)   | H(18B)-C(18)-H(18C) | 109.5      |
| C(2)-C(3)-H(3A)     | 109.2      | C(7)-C(12)-C(16)  | 123.7(2)   | N(3)-C(19)-N(1)     | 115.71(19) |
| C(4)-C(3)-H(3A)     | 109.2      | C(8)-C(13)-C(14)  | 111.4(2)   | N(3)-C(19)-C(20)    | 126.4(2)   |
| C(2)-C(3)-H(3B)     | 109.2      | C(8)-C(13)-C(15)  | 110.1(3)   | N(1)-C(19)-C(20)    | 117.92(19) |
| C(4)-C(3)-H(3B)     | 109.2      | C(14)-C(13)-C(15) | 110.8(2)   | C(19)-C(20)-H(20A)  | 109.5      |
| H(3A)-C(3)-H(3B)    | 107.9      | C(8)-C(13)-H(13)  | 108.1      | C(19)-C(20)-H(20B)  | 109.5      |
| N(2)-C(4)-C(3)      | 108.08(19) | C(14)-C(13)-H(13) | 108.1      | H(20A)-C(20)-H(20B) | 109.5      |
| N(2)-C(4)-H(4A)     | 110.1      | C(15)-C(13)-H(13) | 108.1      | C(19)-C(20)-H(20C)  | 109.5      |

|                     |          |                     |          |
|---------------------|----------|---------------------|----------|
| H(20A)-C(20)-H(20C) | 109.5    | H(29B)-C(29)-H(29C) | 109.5    |
| H(20B)-C(20)-H(20C) | 109.5    | C(26)-C(30)-C(31)   | 111.7(2) |
| C(26)-C(21)-C(22)   | 123.1(2) | C(26)-C(30)-C(32)   | 111.2(2) |
| C(26)-C(21)-N(3)    | 120.1(2) | C(31)-C(30)-C(32)   | 110.0(3) |
| C(22)-C(21)-N(3)    | 116.8(2) | C(26)-C(30)-H(30)   | 107.9    |
| C(23)-C(22)-C(21)   | 117.7(2) | C(31)-C(30)-H(30)   | 107.9    |
| C(23)-C(22)-C(27)   | 119.7(2) | C(32)-C(30)-H(30)   | 107.9    |
| C(21)-C(22)-C(27)   | 122.6(2) | C(30)-C(31)-H(31A)  | 109.5    |
| C(24)-C(23)-C(22)   | 121.3(3) | C(30)-C(31)-H(31B)  | 109.5    |
| C(24)-C(23)-H(23)   | 119.3    | H(31A)-C(31)-H(31B) | 109.5    |
| C(22)-C(23)-H(23)   | 119.3    | C(30)-C(31)-H(31C)  | 109.5    |
| C(25)-C(24)-C(23)   | 119.4(2) | H(31A)-C(31)-H(31C) | 109.5    |
| C(25)-C(24)-H(24)   | 120.3    | H(31B)-C(31)-H(31C) | 109.5    |
| C(23)-C(24)-H(24)   | 120.3    | C(30)-C(32)-H(32A)  | 109.5    |
| C(24)-C(25)-C(26)   | 122.4(2) | C(30)-C(32)-H(32B)  | 109.5    |
| C(24)-C(25)-H(25)   | 118.8    | H(32A)-C(32)-H(32B) | 109.5    |
| C(26)-C(25)-H(25)   | 118.8    | C(30)-C(32)-H(32C)  | 109.5    |
| C(21)-C(26)-C(25)   | 116.0(2) | H(32A)-C(32)-H(32C) | 109.5    |
| C(21)-C(26)-C(30)   | 122.8(2) | H(32B)-C(32)-H(32C) | 109.5    |
| C(25)-C(26)-C(30)   | 121.2(2) | F(1)-B(1)-F(3)      | 110.0(3) |
| C(29)-C(27)-C(28)   | 110.9(2) | F(1)-B(1)-F(4)      | 108.4(3) |
| C(29)-C(27)-C(22)   | 111.0(2) | F(3)-B(1)-F(4)      | 110.5(3) |
| C(28)-C(27)-C(22)   | 112.3(2) | F(1)-B(1)-F(2)      | 109.2(3) |
| C(29)-C(27)-H(27)   | 107.4    | F(3)-B(1)-F(2)      | 111.4(3) |
| C(28)-C(27)-H(27)   | 107.4    | F(4)-B(1)-F(2)      | 107.2(3) |
| C(22)-C(27)-H(27)   | 107.4    |                     |          |
| C(27)-C(28)-H(28A)  | 109.5    |                     |          |
| C(27)-C(28)-H(28B)  | 109.5    |                     |          |
| H(28A)-C(28)-H(28B) | 109.5    |                     |          |
| C(27)-C(28)-H(28C)  | 109.5    |                     |          |
| H(28A)-C(28)-H(28C) | 109.5    |                     |          |
| H(28B)-C(28)-H(28C) | 109.5    |                     |          |
| C(27)-C(29)-H(29A)  | 109.5    |                     |          |
| C(27)-C(29)-H(29B)  | 109.5    |                     |          |
| H(29A)-C(29)-H(29B) | 109.5    |                     |          |
| C(27)-C(29)-H(29C)  | 109.5    |                     |          |
| H(29A)-C(29)-H(29C) | 109.5    |                     |          |

**Table S19.** Anisotropic displacement parameters ( $\text{\AA}^2 \times 10^3$ ) for  $[(\text{CDA}^{\text{Pr}})\text{FeCl}_2]\text{BF}_4$  (**3**) at 200 K. The anisotropic displacement factor exponent takes the form:  $-2p^2[h^2a^{*2}U^{11}+\dots+2hka^*b^*U^{12}]$ .

|        | $U^{11}$ | $U^{22}$ | $U^{33}$ | $U^{23}$ | $U^{13}$ | $U^{12}$ |
|--------|----------|----------|----------|----------|----------|----------|
| Fe(1)  | 34(1)    | 46(1)    | 29(1)    | 0(1)     | 14(1)    | 9(1)     |
| Cl(1)  | 46(2)    | 44(1)    | 81(4)    | -7(2)    | 30(2)    | -1(1)    |
| Cl(2)  | 66(3)    | 97(4)    | 27(1)    | 8(2)     | 20(2)    | 35(3)    |
| Cl(1X) | 40(2)    | 61(2)    | 84(4)    | -27(2)   | 22(2)    | -3(1)    |
| Cl(2X) | 60(3)    | 89(4)    | 32(2)    | 16(2)    | 25(2)    | 32(2)    |
| N(1)   | 34(1)    | 46(1)    | 22(1)    | 2(1)     | 9(1)     | 6(1)     |
| N(2)   | 34(1)    | 45(1)    | 24(1)    | -1(1)    | 14(1)    | 3(1)     |
| N(3)   | 33(1)    | 42(1)    | 26(1)    | -2(1)    | 13(1)    | 5(1)     |
| N(4)   | 35(1)    | 40(1)    | 28(1)    | -1(1)    | 12(1)    | 5(1)     |
| C(1)   | 33(1)    | 38(1)    | 28(1)    | 2(1)     | 14(1)    | 4(1)     |
| C(2)   | 48(2)    | 62(2)    | 21(1)    | 3(1)     | 12(1)    | 9(1)     |
| C(3)   | 53(2)    | 64(2)    | 25(1)    | 8(1)     | 16(1)    | 7(1)     |
| C(4)   | 47(2)    | 63(2)    | 26(1)    | -3(1)    | 19(1)    | 1(1)     |
| C(5)   | 30(1)    | 37(1)    | 32(1)    | -4(1)    | 14(1)    | 1(1)     |
| C(6)   | 52(2)    | 58(2)    | 43(2)    | -7(1)    | 22(1)    | 14(1)    |
| C(7)   | 41(1)    | 45(2)    | 30(1)    | 0(1)     | 13(1)    | 10(1)    |
| C(8)   | 39(1)    | 51(2)    | 36(1)    | -2(1)    | 18(1)    | 9(1)     |
| C(9)   | 42(2)    | 75(2)    | 44(2)    | -1(1)    | 14(1)    | 10(1)    |
| C(10)  | 46(2)    | 77(2)    | 47(2)    | 25(2)    | 17(1)    | 20(2)    |
| C(11)  | 56(2)    | 64(2)    | 54(2)    | 24(1)    | 22(2)    | 16(1)    |
| C(12)  | 46(2)    | 59(2)    | 42(2)    | 11(1)    | 21(1)    | 11(1)    |
| C(13)  | 41(2)    | 54(2)    | 52(2)    | -6(1)    | 18(1)    | 0(1)     |
| C(14)  | 48(2)    | 67(2)    | 83(2)    | 9(2)     | 34(2)    | 3(1)     |
| C(15)  | 69(2)    | 68(2)    | 81(2)    | -29(2)   | 17(2)    | -8(2)    |
| C(16)  | 48(2)    | 53(2)    | 63(2)    | 21(1)    | 19(1)    | 9(1)     |
| C(17)  | 71(2)    | 66(2)    | 90(3)    | 2(2)     | 24(2)    | 1(2)     |
| C(18)  | 62(2)    | 93(3)    | 99(3)    | 35(2)    | 39(2)    | 6(2)     |
| C(19)  | 33(1)    | 36(1)    | 32(1)    | 2(1)     | 12(1)    | 5(1)     |
| C(20)  | 48(2)    | 72(2)    | 40(2)    | 16(1)    | 18(1)    | 25(1)    |
| C(21)  | 32(1)    | 51(2)    | 26(1)    | -2(1)    | 10(1)    | 10(1)    |
| C(22)  | 36(1)    | 54(2)    | 36(1)    | -2(1)    | 15(1)    | 7(1)     |
| C(23)  | 47(2)    | 61(2)    | 40(2)    | 7(1)     | 23(1)    | 8(1)     |
| C(24)  | 48(2)    | 74(2)    | 34(1)    | 10(1)    | 20(1)    | 22(1)    |
| C(25)  | 44(2)    | 60(2)    | 30(1)    | -7(1)    | 7(1)     | 20(1)    |
| C(26)  | 33(1)    | 48(2)    | 29(1)    | -2(1)    | 7(1)     | 9(1)     |
| C(27)  | 51(2)    | 53(2)    | 53(2)    | -10(1)   | 30(1)    | -5(1)    |
| C(28)  | 60(2)    | 58(2)    | 58(2)    | -1(2)    | 14(2)    | 0(1)     |
| C(29)  | 93(2)    | 65(2)    | 49(2)    | -3(2)    | 4(2)     | 3(2)     |
| C(30)  | 48(2)    | 53(2)    | 46(2)    | -13(1)   | 12(1)    | 4(1)     |
| C(31)  | 51(2)    | 109(3)   | 64(2)    | -13(2)   | 5(2)     | -11(2)   |
| C(32)  | 75(2)    | 57(2)    | 92(3)    | 0(2)     | 26(2)    | 12(2)    |
| B(1)   | 59(2)    | 87(3)    | 47(2)    | 15(2)    | 26(2)    | 6(2)     |
| F(1)   | 122(2)   | 141(2)   | 57(1)    | -14(1)   | 18(1)    | -47(2)   |
| F(2)   | 104(2)   | 142(2)   | 114(2)   | 42(2)    | 71(2)    | 17(1)    |
| F(3)   | 94(2)    | 169(2)   | 68(1)    | 44(1)    | 46(1)    | 23(1)    |
| F(4)   | 159(2)   | 91(2)    | 127(2)   | -17(1)   | 89(2)    | -17(2)   |

**Figure S15.** ORTEP plot of  $[(\text{CDA}^{\text{Pr}})\text{FeCl}_2]\text{BF}_4$  (**3**) at 298 K at 50% probability level. Hydrogen atoms, solvent molecules, and counterion were excluded for clarity.

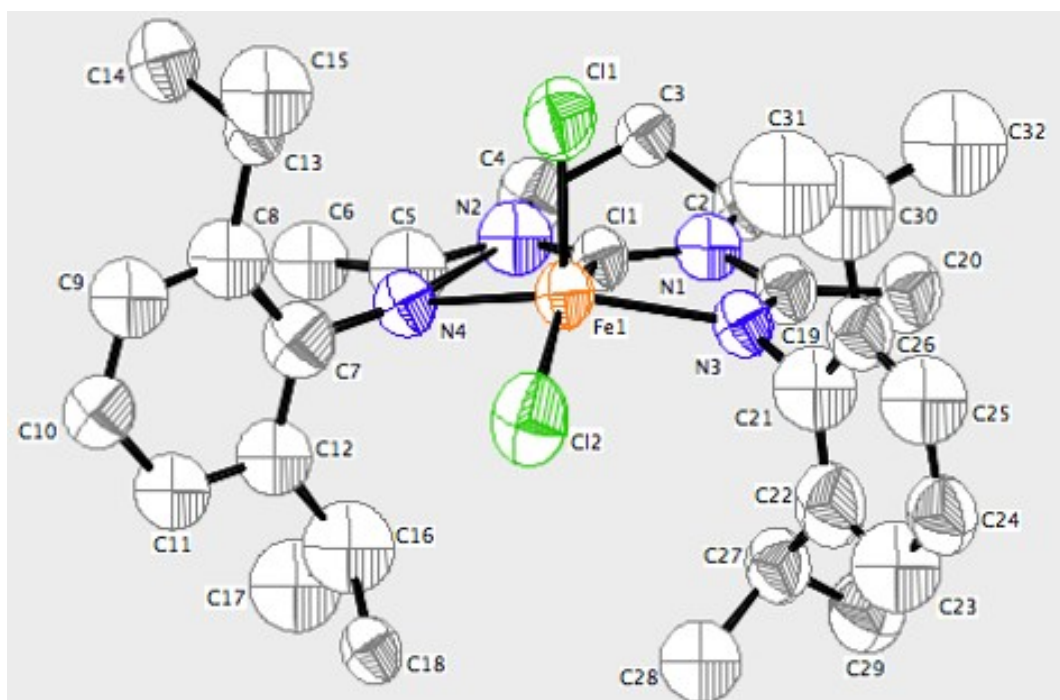

**Table S20.** Bond lengths (Å) and angles (°) for [(CDA<sup>Pr</sup>)FeCl<sub>2</sub>]BF<sub>4</sub> (**3**) at 298 K.

|              |            |              |          |                     |           |
|--------------|------------|--------------|----------|---------------------|-----------|
| Fe(1)-Cl(2X) | 2.009(14)  | C(10)-H(10)  | 0.9300   | C(26)-C(30)         | 1.501(5)  |
| Fe(1)-C(1)   | 2.033(2)   | C(11)-C(12)  | 1.402(4) | C(27)-C(29)         | 1.506(5)  |
| Fe(1)-N(3)   | 2.132(2)   | C(11)-H(11)  | 0.9300   | C(27)-C(28)         | 1.522(5)  |
| Fe(1)-N(4)   | 2.152(2)   | C(12)-C(16)  | 1.519(5) | C(27)-H(27)         | 0.9800    |
| Fe(1)-Cl(1X) | 2.162(13)  | C(13)-C(14)  | 1.536(5) | C(28)-H(28A)        | 0.9600    |
| Fe(1)-Cl(2)  | 2.1798(16) | C(13)-C(15)  | 1.556(5) | C(28)-H(28B)        | 0.9600    |
| Fe(1)-Cl(1)  | 2.1980(14) | C(13)-H(13)  | 0.9800   | C(28)-H(28C)        | 0.9600    |
| N(1)-C(1)    | 1.325(3)   | C(14)-H(14A) | 0.9600   | C(29)-H(29A)        | 0.9600    |
| N(1)-C(19)   | 1.401(3)   | C(14)-H(14B) | 0.9600   | C(29)-H(29B)        | 0.9600    |
| N(1)-C(2)    | 1.496(3)   | C(14)-H(14C) | 0.9600   | C(29)-H(29C)        | 0.9600    |
| N(2)-C(1)    | 1.317(3)   | C(15)-H(15A) | 0.9600   | C(30)-C(32)         | 1.524(5)  |
| N(2)-C(5)    | 1.402(3)   | C(15)-H(15B) | 0.9600   | C(30)-C(31)         | 1.527(4)  |
| N(2)-C(4)    | 1.486(3)   | C(15)-H(15C) | 0.9600   | C(30)-H(30)         | 0.9800    |
| N(3)-C(19)   | 1.286(3)   | C(16)-C(17)  | 1.532(6) | C(31)-H(31A)        | 0.9600    |
| N(3)-C(21)   | 1.453(3)   | C(16)-C(18)  | 1.536(5) | C(31)-H(31B)        | 0.9600    |
| N(4)-C(5)    | 1.301(3)   | C(16)-H(16)  | 0.9800   | C(31)-H(31C)        | 0.9600    |
| N(4)-C(7)    | 1.443(3)   | C(17)-H(17A) | 0.9600   | C(32)-H(32A)        | 0.9600    |
| C(2)-C(3)    | 1.508(4)   | C(17)-H(17B) | 0.9600   | C(32)-H(32B)        | 0.9600    |
| C(2)-H(2A)   | 0.9700     | C(17)-H(17C) | 0.9600   | C(32)-H(32C)        | 0.9600    |
| C(2)-H(2B)   | 0.9700     | C(18)-H(18A) | 0.9600   | B(1)-F(3X)          | 1.214(16) |
| C(3)-C(4)    | 1.503(4)   | C(18)-H(18B) | 0.9600   | B(1)-F(1)           | 1.282(6)  |
| C(3)-H(3A)   | 0.9700     | C(18)-H(18C) | 0.9600   | B(1)-F(4X)          | 1.299(17) |
| C(3)-H(3B)   | 0.9700     | C(19)-C(20)  | 1.476(4) | B(1)-F(3)           | 1.339(6)  |
| C(4)-H(4A)   | 0.9700     | C(20)-H(20A) | 0.9600   | B(1)-F(4)           | 1.357(7)  |
| C(4)-H(4B)   | 0.9700     | C(20)-H(20B) | 0.9600   | B(1)-F(1X)          | 1.361(18) |
| C(5)-C(6)    | 1.468(4)   | C(20)-H(20C) | 0.9600   | B(1)-F(2)           | 1.396(6)  |
| C(6)-H(6A)   | 0.9600     | C(21)-C(22)  | 1.392(4) | B(1)-F(2X)          | 1.41(2)   |
| C(6)-H(6B)   | 0.9600     | C(21)-C(26)  | 1.402(4) | Cl(2X)-Fe(1)-C(1)   | 169.2(5)  |
| C(6)-H(6C)   | 0.9600     | C(22)-C(23)  | 1.393(4) | Cl(2X)-Fe(1)-N(3)   | 104.0(4)  |
| C(7)-C(8)    | 1.396(4)   | C(22)-C(27)  | 1.512(5) | C(1)-Fe(1)-N(3)     | 73.91(10) |
| C(7)-C(12)   | 1.400(5)   | C(23)-C(24)  | 1.383(5) | Cl(2X)-Fe(1)-N(4)   | 103.8(4)  |
| C(8)-C(9)    | 1.381(4)   | C(23)-H(23)  | 0.9300   | C(1)-Fe(1)-N(4)     | 73.97(10) |
| C(8)-C(13)   | 1.501(5)   | C(24)-C(25)  | 1.367(5) | N(3)-Fe(1)-N(4)     | 142.44(8) |
| C(9)-C(10)   | 1.374(5)   | C(24)-H(24)  | 0.9300   | Cl(2X)-Fe(1)-Cl(1X) | 108.3(4)  |
| C(9)-H(9)    | 0.9300     | C(25)-C(26)  | 1.389(4) | C(1)-Fe(1)-Cl(1X)   | 82.5(4)   |
| C(10)-C(11)  | 1.385(5)   | C(25)-H(25)  | 0.9300   | N(3)-Fe(1)-Cl(1X)   | 96.8(3)   |

|                    |            |                   |          |                     |          |
|--------------------|------------|-------------------|----------|---------------------|----------|
| N(4)-Fe(1)-Cl(1X)  | 97.8(3)    | C(2)-C(3)-H(3B)   | 109.1    | C(14)-C(13)-C(15)   | 110.1(3) |
| Cl(2X)-Fe(1)-Cl(2) | 19.3(4)    | H(3A)-C(3)-H(3B)  | 107.8    | C(8)-C(13)-H(13)    | 107.9    |
| C(1)-Fe(1)-Cl(2)   | 149.86(15) | N(2)-C(4)-C(3)    | 108.1(2) | C(14)-C(13)-H(13)   | 107.9    |
| N(3)-Fe(1)-Cl(2)   | 99.56(7)   | N(2)-C(4)-H(4A)   | 110.1    | C(15)-C(13)-H(13)   | 107.9    |
| N(4)-Fe(1)-Cl(2)   | 98.46(8)   | C(3)-C(4)-H(4A)   | 110.1    | C(13)-C(14)-H(14A)  | 109.5    |
| Cl(1X)-Fe(1)-Cl(2) | 127.6(3)   | N(2)-C(4)-H(4B)   | 110.1    | C(13)-C(14)-H(14B)  | 109.5    |
| Cl(2X)-Fe(1)-Cl(1) | 91.9(4)    | C(3)-C(4)-H(4B)   | 110.1    | H(14A)-C(14)-H(14B) | 109.5    |
| C(1)-Fe(1)-Cl(1)   | 98.91(14)  | H(4A)-C(4)-H(4B)  | 108.4    | C(13)-C(14)-H(14C)  | 109.5    |
| N(3)-Fe(1)-Cl(1)   | 101.43(8)  | N(4)-C(5)-N(2)    | 115.8(2) | H(14A)-C(14)-H(14C) | 109.5    |
| N(4)-Fe(1)-Cl(1)   | 102.29(8)  | N(4)-C(5)-C(6)    | 125.9(3) | H(14B)-C(14)-H(14C) | 109.5    |
| Cl(1X)-Fe(1)-Cl(1) | 16.4(3)    | N(2)-C(5)-C(6)    | 118.3(2) | C(13)-C(15)-H(15A)  | 109.5    |
| Cl(2)-Fe(1)-Cl(1)  | 111.22(7)  | C(5)-C(6)-H(6A)   | 109.5    | C(13)-C(15)-H(15B)  | 109.5    |
| C(1)-N(1)-C(19)    | 114.4(2)   | C(5)-C(6)-H(6B)   | 109.5    | H(15A)-C(15)-H(15B) | 109.5    |
| C(1)-N(1)-C(2)     | 121.7(2)   | H(6A)-C(6)-H(6B)  | 109.5    | C(13)-C(15)-H(15C)  | 109.5    |
| C(19)-N(1)-C(2)    | 123.3(2)   | C(5)-C(6)-H(6C)   | 109.5    | H(15A)-C(15)-H(15C) | 109.5    |
| C(1)-N(2)-C(5)     | 114.6(2)   | H(6A)-C(6)-H(6C)  | 109.5    | H(15B)-C(15)-H(15C) | 109.5    |
| C(1)-N(2)-C(4)     | 122.3(2)   | H(6B)-C(6)-H(6C)  | 109.5    | C(12)-C(16)-C(17)   | 110.5(3) |
| C(5)-N(2)-C(4)     | 122.8(2)   | C(8)-C(7)-C(12)   | 122.5(3) | C(12)-C(16)-C(18)   | 111.8(3) |
| C(19)-N(3)-C(21)   | 119.0(2)   | C(8)-C(7)-N(4)    | 119.3(3) | C(17)-C(16)-C(18)   | 111.1(4) |
| C(19)-N(3)-Fe(1)   | 116.04(18) | C(12)-C(7)-N(4)   | 118.2(3) | C(12)-C(16)-H(16)   | 107.8    |
| C(21)-N(3)-Fe(1)   | 124.66(15) | C(9)-C(8)-C(7)    | 117.0(3) | C(17)-C(16)-H(16)   | 107.8    |
| C(5)-N(4)-C(7)     | 120.1(2)   | C(9)-C(8)-C(13)   | 119.6(3) | C(18)-C(16)-H(16)   | 107.8    |
| C(5)-N(4)-Fe(1)    | 115.01(18) | C(7)-C(8)-C(13)   | 123.4(3) | C(16)-C(17)-H(17A)  | 109.5    |
| C(7)-N(4)-Fe(1)    | 124.86(16) | C(10)-C(9)-C(8)   | 122.6(3) | C(16)-C(17)-H(17B)  | 109.5    |
| N(2)-C(1)-N(1)     | 122.9(2)   | C(10)-C(9)-H(9)   | 118.7    | H(17A)-C(17)-H(17B) | 109.5    |
| N(2)-C(1)-Fe(1)    | 118.75(18) | C(8)-C(9)-H(9)    | 118.7    | C(16)-C(17)-H(17C)  | 109.5    |
| N(1)-C(1)-Fe(1)    | 117.95(19) | C(9)-C(10)-C(11)  | 119.7(3) | H(17A)-C(17)-H(17C) | 109.5    |
| N(1)-C(2)-C(3)     | 107.4(2)   | C(9)-C(10)-H(10)  | 120.2    | H(17B)-C(17)-H(17C) | 109.5    |
| N(1)-C(2)-H(2A)    | 110.2      | C(11)-C(10)-H(10) | 120.2    | C(16)-C(18)-H(18A)  | 109.5    |
| C(3)-C(2)-H(2A)    | 110.2      | C(10)-C(11)-C(12) | 120.4(4) | C(16)-C(18)-H(18B)  | 109.5    |
| N(1)-C(2)-H(2B)    | 110.2      | C(10)-C(11)-H(11) | 119.8    | H(18A)-C(18)-H(18B) | 109.5    |
| C(3)-C(2)-H(2B)    | 110.2      | C(12)-C(11)-H(11) | 119.8    | C(16)-C(18)-H(18C)  | 109.5    |
| H(2A)-C(2)-H(2B)   | 108.5      | C(7)-C(12)-C(11)  | 117.8(3) | H(18A)-C(18)-H(18C) | 109.5    |
| C(4)-C(3)-C(2)     | 112.6(3)   | C(7)-C(12)-C(16)  | 123.9(3) | H(18B)-C(18)-H(18C) | 109.5    |
| C(4)-C(3)-H(3A)    | 109.1      | C(11)-C(12)-C(16) | 118.3(3) | N(3)-C(19)-N(1)     | 115.4(2) |
| C(2)-C(3)-H(3A)    | 109.1      | C(8)-C(13)-C(14)  | 111.7(3) | N(3)-C(19)-C(20)    | 126.6(3) |
| C(4)-C(3)-H(3B)    | 109.1      | C(8)-C(13)-C(15)  | 111.2(3) | N(1)-C(19)-C(20)    | 118.0(2) |



|                     |          |                     |           |                  |           |
|---------------------|----------|---------------------|-----------|------------------|-----------|
| C(19)-C(20)-H(20A)  | 109.5    | C(27)-C(29)-H(29B)  | 109.5     | F(4)-B(1)-F(1X)  | 58.2(13)  |
| C(19)-C(20)-H(20B)  | 109.5    | H(29A)-C(29)-H(29B) | 109.5     | F(3X)-B(1)-F(2)  | 81.0(9)   |
| H(20A)-C(20)-H(20B) | 109.5    | C(27)-C(29)-H(29C)  | 109.5     | F(1)-B(1)-F(2)   | 109.1(5)  |
| C(19)-C(20)-H(20C)  | 109.5    | H(29A)-C(29)-H(29C) | 109.5     | F(4X)-B(1)-F(2)  | 44.5(10)  |
| H(20A)-C(20)-H(20C) | 109.5    | H(29B)-C(29)-H(29C) | 109.5     | F(3)-B(1)-F(2)   | 112.2(5)  |
| H(20B)-C(20)-H(20C) | 109.5    | C(26)-C(30)-C(32)   | 111.4(3)  | F(4)-B(1)-F(2)   | 103.0(5)  |
| C(22)-C(21)-C(26)   | 122.8(3) | C(26)-C(30)-C(31)   | 112.1(3)  | F(1X)-B(1)-F(2)  | 131.1(10) |
| C(22)-C(21)-N(3)    | 117.5(3) | C(32)-C(30)-C(31)   | 108.8(3)  | F(3X)-B(1)-F(2X) | 110.6(13) |
| C(26)-C(21)-N(3)    | 119.6(3) | C(26)-C(30)-H(30)   | 108.2     | F(1)-B(1)-F(2X)  | 72.0(11)  |
| C(21)-C(22)-C(23)   | 117.5(3) | C(32)-C(30)-H(30)   | 108.2     | F(4X)-B(1)-F(2X) | 96.2(14)  |
| C(21)-C(22)-C(27)   | 122.9(3) | C(31)-C(30)-H(30)   | 108.2     | F(3)-B(1)-F(2X)  | 40.6(10)  |
| C(23)-C(22)-C(27)   | 119.6(3) | C(30)-C(31)-H(31A)  | 109.5     | F(4)-B(1)-F(2X)  | 134.1(11) |
| C(24)-C(23)-C(22)   | 120.9(4) | C(30)-C(31)-H(31B)  | 109.5     | F(1X)-B(1)-F(2X) | 97.9(13)  |
| C(24)-C(23)-H(23)   | 119.5    | H(31A)-C(31)-H(31B) | 109.5     | F(2)-B(1)-F(2X)  | 120.4(11) |
| C(22)-C(23)-H(23)   | 119.5    | C(30)-C(31)-H(31C)  | 109.5     |                  |           |
| C(25)-C(24)-C(23)   | 120.1(3) | H(31A)-C(31)-H(31C) | 109.5     |                  |           |
| C(25)-C(24)-H(24)   | 120.0    | H(31B)-C(31)-H(31C) | 109.5     |                  |           |
| C(23)-C(24)-H(24)   | 120.0    | C(30)-C(32)-H(32A)  | 109.5     |                  |           |
| C(24)-C(25)-C(26)   | 121.9(3) | C(30)-C(32)-H(32B)  | 109.5     |                  |           |
| C(24)-C(25)-H(25)   | 119.0    | H(32A)-C(32)-H(32B) | 109.5     |                  |           |
| C(26)-C(25)-H(25)   | 119.0    | C(30)-C(32)-H(32C)  | 109.5     |                  |           |
| C(25)-C(26)-C(21)   | 116.8(3) | H(32A)-C(32)-H(32C) | 109.5     |                  |           |
| C(25)-C(26)-C(30)   | 121.0(3) | H(32B)-C(32)-H(32C) | 109.5     |                  |           |
| C(21)-C(26)-C(30)   | 122.1(3) | F(3X)-B(1)-F(1)     | 166.9(11) |                  |           |
| C(29)-C(27)-C(22)   | 112.6(3) | F(3X)-B(1)-F(4X)    | 125.3(14) |                  |           |
| C(29)-C(27)-C(28)   | 109.9(3) | F(1)-B(1)-F(4X)     | 65.9(10)  |                  |           |
| C(22)-C(27)-C(28)   | 111.7(3) | F(3X)-B(1)-F(3)     | 70.0(10)  |                  |           |
| C(29)-C(27)-H(27)   | 107.5    | F(1)-B(1)-F(3)      | 111.9(6)  |                  |           |
| C(22)-C(27)-H(27)   | 107.5    | F(4X)-B(1)-F(3)     | 119.4(10) |                  |           |
| C(28)-C(27)-H(27)   | 107.5    | F(3X)-B(1)-F(4)     | 59.8(10)  |                  |           |
| C(27)-C(28)-H(28A)  | 109.5    | F(1)-B(1)-F(4)      | 108.7(6)  |                  |           |
| C(27)-C(28)-H(28B)  | 109.5    | F(4X)-B(1)-F(4)     | 126.9(10) |                  |           |
| H(28A)-C(28)-H(28B) | 109.5    | F(3)-B(1)-F(4)      | 111.5(5)  |                  |           |
| C(27)-C(28)-H(28C)  | 109.5    | F(3X)-B(1)-F(1X)    | 114.6(16) |                  |           |
| H(28A)-C(28)-H(28C) | 109.5    | F(1)-B(1)-F(1X)     | 52.5(11)  |                  |           |
| H(28B)-C(28)-H(28C) | 109.5    | F(4X)-B(1)-F(1X)    | 107.3(12) |                  |           |
| C(27)-C(29)-H(29A)  | 109.5    | F(3)-B(1)-F(1X)     | 116.7(10) |                  |           |

**Table S21.** Anisotropic displacement parameters ( $\text{\AA}^2 \times 10^3$ ) for  $[(\text{CDA}^{\text{Pr}})\text{FeCl}_2]\text{BF}_4$  (**3**) at 298 K. The anisotropic displacement factor exponent takes the form:  $-2p^2[h^2a^*2U^{11}+\dots+2hka^*b^*U^{12}]$ .

|       | $U^{11}$ | $U^{22}$ | $U^{33}$ | $U^{23}$ | $U^{13}$ | $U^{12}$ |
|-------|----------|----------|----------|----------|----------|----------|
| Fe(1) | 52(1)    | 66(1)    | 43(1)    | -1(1)    | 20(1)    | 10(1)    |
| Cl(1) | 71(1)    | 78(1)    | 139(2)   | -31(1)   | 46(1)    | -8(1)    |
| Cl(2) | 95(1)    | 145(2)   | 52(1)    | 28(1)    | 42(1)    | 49(1)    |
| N(1)  | 54(1)    | 62(2)    | 39(1)    | 4(1)     | 17(1)    | 8(1)     |
| N(2)  | 58(1)    | 61(2)    | 38(1)    | -5(1)    | 24(1)    | 3(1)     |
| N(3)  | 46(1)    | 60(2)    | 42(1)    | 0(1)     | 16(1)    | 6(1)     |
| N(4)  | 54(1)    | 54(2)    | 47(1)    | -3(1)    | 21(1)    | 4(1)     |
| C(1)  | 49(2)    | 61(2)    | 40(1)    | -2(1)    | 18(1)    | 0(1)     |
| C(2)  | 67(2)    | 95(3)    | 39(1)    | 11(1)    | 16(1)    | 11(2)    |
| C(3)  | 76(2)    | 98(3)    | 46(2)    | 12(2)    | 30(2)    | 6(2)     |
| C(4)  | 70(2)    | 93(3)    | 41(1)    | -2(2)    | 30(1)    | -2(2)    |
| C(5)  | 52(2)    | 59(2)    | 51(1)    | -3(1)    | 24(1)    | 0(2)     |
| C(6)  | 85(2)    | 87(3)    | 67(2)    | -8(2)    | 41(2)    | 22(2)    |
| C(7)  | 61(2)    | 62(2)    | 48(1)    | 5(1)     | 22(1)    | 11(2)    |
| C(8)  | 57(2)    | 66(2)    | 60(2)    | -3(2)    | 25(1)    | 7(2)     |
| C(9)  | 61(2)    | 96(3)    | 72(2)    | 6(2)     | 18(2)    | 13(2)    |
| C(10) | 80(3)    | 108(4)   | 81(2)    | 34(2)    | 26(2)    | 31(2)    |
| C(11) | 80(3)    | 93(3)    | 96(2)    | 33(2)    | 38(2)    | 20(2)    |
| C(12) | 69(2)    | 81(3)    | 68(2)    | 15(2)    | 29(2)    | 13(2)    |
| C(13) | 64(2)    | 74(3)    | 84(2)    | -4(2)    | 27(2)    | 7(2)     |
| C(14) | 88(3)    | 105(4)   | 134(3)   | 14(3)    | 67(3)    | 7(3)     |
| C(15) | 100(3)   | 112(4)   | 115(3)   | -37(3)   | 25(3)    | -7(3)    |
| C(16) | 76(2)    | 75(3)    | 111(3)   | 28(2)    | 36(2)    | 11(2)    |
| C(17) | 98(3)    | 107(4)   | 154(4)   | -21(3)   | 43(3)    | -19(3)   |
| C(18) | 107(3)   | 132(4)   | 156(4)   | 41(3)    | 76(3)    | 1(3)     |
| C(19) | 54(2)    | 55(2)    | 47(1)    | 1(1)     | 20(1)    | 8(1)     |
| C(20) | 64(2)    | 108(3)   | 58(2)    | 18(2)    | 23(2)    | 31(2)    |
| C(21) | 48(2)    | 70(2)    | 42(1)    | 0(1)     | 17(1)    | 11(2)    |
| C(22) | 58(2)    | 72(2)    | 54(2)    | 3(1)     | 27(1)    | 9(2)     |
| C(23) | 66(2)    | 82(3)    | 67(2)    | 8(2)     | 32(2)    | 13(2)    |
| C(24) | 79(2)    | 98(3)    | 56(2)    | 7(2)     | 34(2)    | 27(2)    |
| C(25) | 75(2)    | 80(3)    | 52(2)    | -6(2)    | 23(2)    | 30(2)    |
| C(26) | 54(2)    | 69(2)    | 46(1)    | -2(1)    | 12(1)    | 15(2)    |
| C(27) | 81(2)    | 74(3)    | 73(2)    | -13(2)   | 45(2)    | -13(2)   |
| C(28) | 93(3)    | 77(3)    | 105(3)   | 1(2)     | 22(2)    | 0(2)     |
| C(29) | 133(4)   | 89(4)    | 83(2)    | -7(2)    | 10(2)    | -5(3)    |
| C(30) | 68(2)    | 65(2)    | 71(2)    | -15(2)   | 21(2)    | 6(2)     |
| C(31) | 79(3)    | 149(5)   | 98(3)    | -26(3)   | 5(2)     | -17(3)   |
| C(32) | 117(3)   | 82(4)    | 155(4)   | 25(3)    | 48(3)    | 11(3)    |
| B(1)  | 120(5)   | 131(6)   | 84(3)    | 1(3)     | 52(3)    | -12(4)   |
| F(1)  | 227(6)   | 232(7)   | 80(2)    | -31(3)   | 13(3)    | -110(5)  |
| F(2)  | 142(4)   | 233(6)   | 173(4)   | 48(4)    | 103(3)   | -6(4)    |
| F(3)  | 142(3)   | 245(6)   | 96(2)    | 62(3)    | 69(2)    | 9(3)     |
| F(4)  | 290(7)   | 130(5)   | 227(6)   | -49(4)   | 171(6)   | -68(5)   |
